# Supplementary material
Source: Royal Society of Chemistry journal article supplement (doi:10.1039/d6qo00609d)
Supplement: d6qo00609d1.pdf [file d6qo00609d1.pdf]

## Supporting Information

### **Remote Asymmetric amination of Naphthalene-Blocked Alkynes with various amines**

Su Xie,<sup>a</sup> Shi-Wu Li<sup>a</sup> \*

<sup>a</sup>School of Chemistry and Chemical Engineering/State Key Laboratory Incubation Base for Green Processing of Chemical Engineering, Shihezi University, Shihezi, Xinjiang 832003, China  
E-mail: lishiwu@shzu.edu.cn.

## Table of Contents

|                                                              |      |
|--------------------------------------------------------------|------|
| I General Information .....                                  | S1   |
| II Optimization of Reaction Conditions .....                 | S2   |
| III Experimental Section .....                               | S8   |
| IV References .....                                          | S40  |
| V NMR Spectrum .....                                         | S41  |
| VI Chiral HPLC analysis trace .....                          | S104 |
| VII. Single Crystal X-Ray Diffraction of 3q, 5a and 7a. .... | S127 |

## I General Information

Commercially available materials were used as received, unless otherwise noted, all reactions and manipulations involving air- or moisture-sensitive compounds were performed using standard Schlenk technique. Reactions were checked by TLC analysis and plates were visualized with short-wave UV light (254 nm). HPLC analysis of the compounds was done using chiralcel ADH, ODH, IA or OJH column using hexane and isopropanol as eluent, and the column temperature is 40 °C. The Rudolph Autopol V polarimeter was employed to gauge the optical rotation. The <sup>1</sup>H, <sup>13</sup>C NMR and <sup>19</sup>F spectra were obtained in CDCl<sub>3</sub> using a Bruker-Bio Spin AVANCE III HD NMR spectrometer at 400 MHz, 100 MHz and 376 MHz respectively. Chemical shifts are reported in parts per million (δ value) calibrated against the residual solvent peak. The melting point was measured by Shanghai Instrument electrooptical SGW X-4A micro melting point instrument. High resolution mass spectra (HRMS) were recorded on Thermo Scientific Q Exactive mass spectrometry equipped with an APCI source. Crystal structure data was collected on a SuperNova, Dual, Cu at zero, Atlas diffractometer. The following abbreviations are used to designate chemical shift multiplicities: s = singlet, d = doublet, t = triplet, q = quartet, m = multiplet.

## II Optimization of Reaction Conditions

**Table 1.** Optimization of the Reaction Conditions

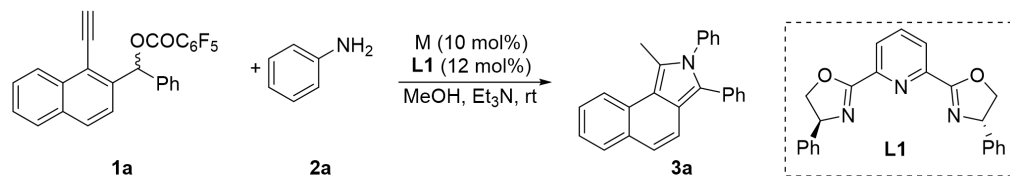

Table S1: Copper screening<sup>a</sup>

| Entry | M                                                   | Ligand    | Solvent | T (°C) | Yield (%) <sup>b</sup> |
|-------|-----------------------------------------------------|-----------|---------|--------|------------------------|
| 1     | Cu(CH <sub>3</sub> CN) <sub>4</sub> BF <sub>4</sub> | <b>L1</b> | MeOH    | 25     | 84                     |
| 2     | CuOTf                                               | <b>L1</b> | MeOH    | 25     | 79                     |
| 3     | CuI                                                 | <b>L1</b> | MeOH    | 25     | 75                     |
| 4     | Cu(CH <sub>3</sub> CN) <sub>4</sub> PF <sub>6</sub> | <b>L1</b> | MeOH    | 25     | 80                     |
| 5     | Cu <sub>2</sub> O                                   | <b>L1</b> | MeOH    | 25     | 79                     |
| 6     | CuBr                                                | <b>L1</b> | MeOH    | 25     | 95                     |
| 7     | CuCl                                                | <b>L1</b> | MeOH    | 25     | 83                     |
| 8     | CuTc                                                | <b>L1</b> | MeOH    | 25     | 76                     |
| 9     | CuOAc                                               | <b>L1</b> | MeOH    | 25     | 76                     |

<sup>a</sup>Reaction conditions: **1a** (0.1 mmol), **2a** (0.12 mmol), **M** (10 mol%), **L1** (12 mol%), MeOH (1.0 mL) at 25 °C under Argon atmosphere for 24 h. <sup>b</sup>Isolated yields.

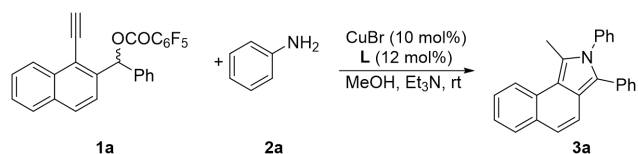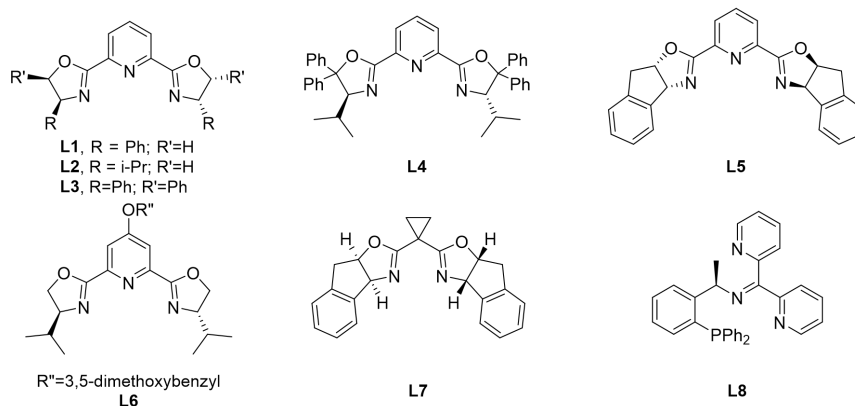

Table S2: Ligand screening<sup>a</sup>

| Entry | M    | Ligand    | Solvent | T (°C) | Yield (%) <sup>b</sup> |
|-------|------|-----------|---------|--------|------------------------|
| 1     | CuBr | <b>L1</b> | MeOH    | 25     | 95                     |
| 2     | CuBr | <b>L2</b> | MeOH    | 25     | 73                     |
| 3     | CuBr | <b>L3</b> | MeOH    | 25     | 85                     |
| 4     | CuBr | <b>L4</b> | MeOH    | 25     | 79                     |
| 5     | CuBr | <b>L5</b> | MeOH    | 25     | 83                     |
| 6     | CuBr | <b>L6</b> | MeOH    | 25     | 89                     |
| 7     | CuBr | <b>L7</b> | MeOH    | 25     | 89                     |
| 8     | CuBr | <b>L8</b> | MeOH    | 25     | 77                     |

<sup>a</sup>Reaction conditions: **1a** (0.1 mmol), **2a** (0.12 mmol), CuBr (10 mol%), **L** (12 mol%), MeOH (1.0 mL) at 25 °C under Argon atmosphere for 24 h. <sup>b</sup>Isolated yields.

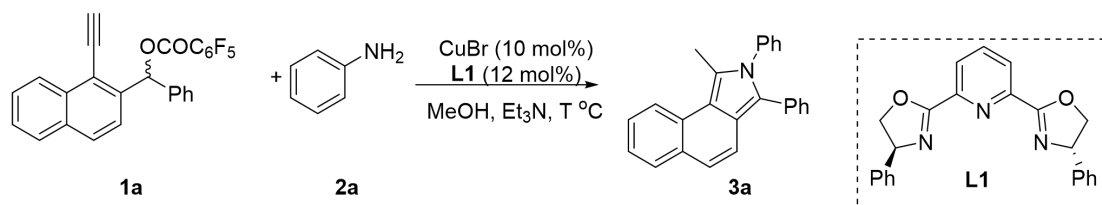

Table S3: Temperature screening<sup>a</sup>

| Entry | M    | Ligand    | Solvent | T (°C) | Yield (%) <sup>b</sup> |
|-------|------|-----------|---------|--------|------------------------|
| 1     | CuBr | <b>L1</b> | MeOH    | 0      | 83                     |
| 2     | CuBr | <b>L1</b> | MeOH    | -20    | 74                     |

<sup>a</sup>Reaction conditions: **1a** (0.1 mmol), **2a** (0.12 mmol), CuBr (10 mol%), **L1** (12 mol%), MeOH (1.0 mL) at T °C under Argon atmosphere for 24 h. <sup>b</sup>Isolated yields.

**Table 2. Optimization of the Reaction Conditions**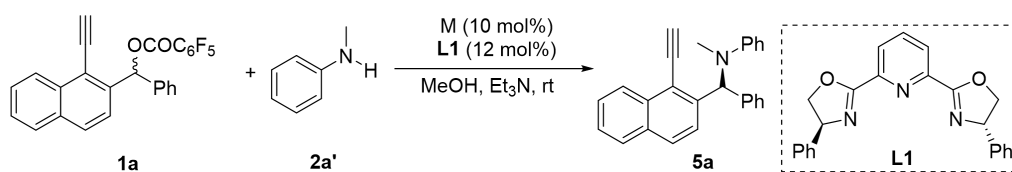Table S4: Copper screening<sup>a</sup>

| Entry | M                                                   | Base              | Ligand    | Solvent | Time (h) | Yield (%) <sup>b</sup> | Er <sup>c</sup> |
|-------|-----------------------------------------------------|-------------------|-----------|---------|----------|------------------------|-----------------|
| 1     | Cu(CH <sub>3</sub> CN) <sub>4</sub> BF <sub>4</sub> | Et <sub>3</sub> N | <b>L1</b> | MeOH    | 24       | 81                     | 86:14           |
| 2     | CuOTf                                               | Et <sub>3</sub> N | <b>L1</b> | MeOH    | 24       | 74                     | 85:15           |
| 3     | CuI                                                 | Et <sub>3</sub> N | <b>L1</b> | MeOH    | 24       | 82                     | 86:14           |
| 4     | Cu(CH <sub>3</sub> CN) <sub>4</sub> PF <sub>6</sub> | Et <sub>3</sub> N | <b>L1</b> | MeOH    | 24       | 80                     | 87:13           |
| 5     | Cu <sub>2</sub> O                                   | Et <sub>3</sub> N | <b>L1</b> | MeOH    | 24       | 79                     | 84:16           |
| 6     | CuBr                                                | Et <sub>3</sub> N | <b>L1</b> | MeOH    | 24       | 82                     | 85:15           |
| 7     | CuCl                                                | Et <sub>3</sub> N | <b>L1</b> | MeOH    | 24       | 80                     | 84:16           |
| 8     | CuTc                                                | Et <sub>3</sub> N | <b>L1</b> | MeOH    | 24       | 79                     | 85:15           |
| 9     | CuOAc                                               | Et <sub>3</sub> N | <b>L1</b> | MeOH    | 24       | 74                     | 85:15           |

<sup>a</sup>Reaction conditions: **1a** (0.1 mmol), **2a'** (0.2 mmol), M (10 mol%), **L1** (12 mol%), Et<sub>3</sub>N (2.0 equiv), MeOH (1.0 mL) at rt under Argon atmosphere for 24 h. <sup>b</sup>isolated yield. <sup>c</sup>Determined by chiral HPLC analysis.

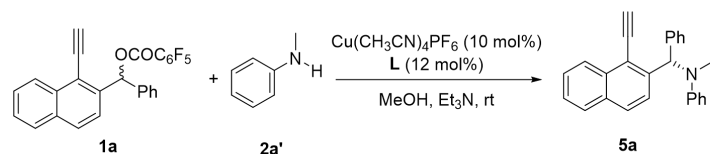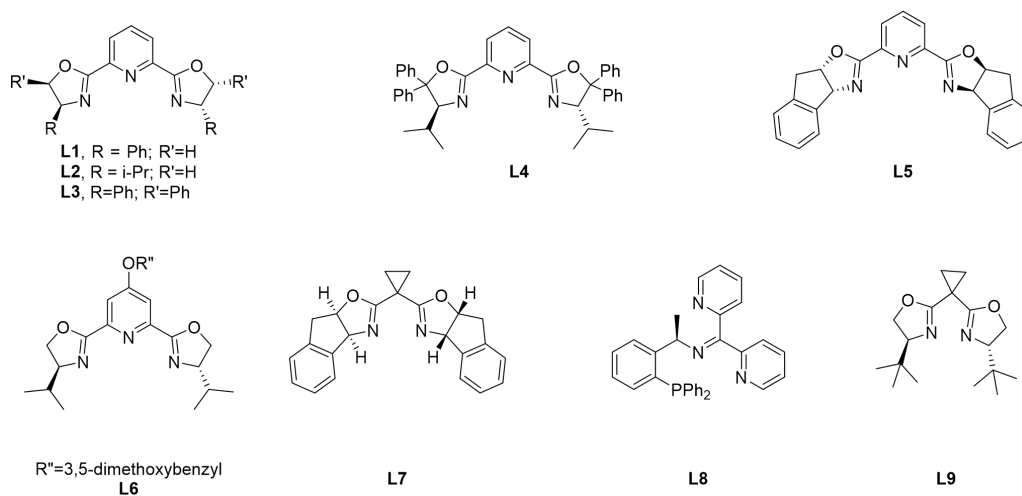

Table S5 Ligands screening<sup>a</sup>

| Entry | M                                              | Base                  | Ligand    | Solvent | Time (h) | Yield (%) <sup>b</sup> | Er <sup>c</sup> |
|-------|------------------------------------------------|-----------------------|-----------|---------|----------|------------------------|-----------------|
| 1     | $\text{Cu}(\text{CH}_3\text{CN})_4\text{PF}_6$ | $\text{Et}_3\text{N}$ | <b>L1</b> | MeOH    | 24       | 80                     | 87:13           |
| 2     | $\text{Cu}(\text{CH}_3\text{CN})_4\text{PF}_6$ | $\text{Et}_3\text{N}$ | <b>L2</b> | MeOH    | 24       | 79                     | 86:14           |
| 3     | $\text{Cu}(\text{CH}_3\text{CN})_4\text{PF}_6$ | $\text{Et}_3\text{N}$ | <b>L3</b> | MeOH    | 24       | 75                     | 89:11           |
| 4     | $\text{Cu}(\text{CH}_3\text{CN})_4\text{PF}_6$ | $\text{Et}_3\text{N}$ | <b>L4</b> | MeOH    | 24       | 76                     | 86:14           |
| 5     | $\text{Cu}(\text{CH}_3\text{CN})_4\text{PF}_6$ | $\text{Et}_3\text{N}$ | <b>L5</b> | MeOH    | 24       | 89                     | 93:7            |
| 6     | $\text{Cu}(\text{CH}_3\text{CN})_4\text{PF}_6$ | $\text{Et}_3\text{N}$ | <b>L6</b> | MeOH    | 24       | 71                     | 87:13           |
| 7     | $\text{Cu}(\text{CH}_3\text{CN})_4\text{PF}_6$ | $\text{Et}_3\text{N}$ | <b>L7</b> | MeOH    | 24       | 81                     | 83:17           |
| 8     | $\text{Cu}(\text{CH}_3\text{CN})_4\text{PF}_6$ | $\text{Et}_3\text{N}$ | <b>L8</b> | MeOH    | 24       | 86                     | 77:23           |
| 9     | $\text{Cu}(\text{CH}_3\text{CN})_4\text{PF}_6$ | $\text{Et}_3\text{N}$ | <b>L9</b> | MeOH    | 24       | 79                     | 67:33           |

<sup>a</sup>Reaction conditions: **1a** (0.1 mmol), **2a'** (0.2 mmol),  $\text{Cu}(\text{CH}_3\text{CN})_4\text{PF}_6$  (10 mol%), **L** (12 mol%),  $\text{Et}_3\text{N}$  (2.0 equiv), MeOH (1.0 mL) at rt under Argon atmosphere for 24 h. <sup>b</sup>isolated yield. <sup>c</sup>Determined by chiral HPLC analysis.

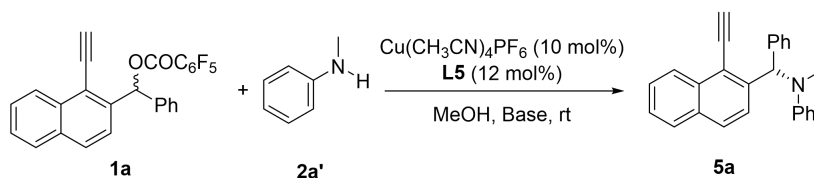

Table S6 Bases screening<sup>a</sup>

| Entry | M                                                   | Base                            | Ligand    | Solvent | Time (h) | Yield (%) <sup>b</sup> | Er <sup>c</sup> |
|-------|-----------------------------------------------------|---------------------------------|-----------|---------|----------|------------------------|-----------------|
| 1     | Cu(CH <sub>3</sub> CN) <sub>4</sub> PF <sub>6</sub> | Et <sub>3</sub> N               | <b>L5</b> | MeOH    | 24       | 89                     | 93:7            |
| 2     | Cu(CH <sub>3</sub> CN) <sub>4</sub> PF <sub>6</sub> | CS <sub>2</sub> CO <sub>3</sub> | <b>L5</b> | MeOH    | 24       | 77                     | 90:10           |
| 3     | Cu(CH <sub>3</sub> CN) <sub>4</sub> PF <sub>6</sub> | DIPEA                           | <b>L5</b> | MeOH    | 24       | 85                     | 89:11           |
| 4     | Cu(CH <sub>3</sub> CN) <sub>4</sub> PF <sub>6</sub> | NMM                             | <b>L5</b> | MeOH    | 24       | 76                     | 92:8            |
| 5     | Cu(CH <sub>3</sub> CN) <sub>4</sub> PF <sub>6</sub> | Py                              | <b>L5</b> | MeOH    | 24       | 76                     | 53:47           |

<sup>a</sup>Reaction conditions: **1a** (0.1 mmol), **2a'** (0.2 mmol), Cu(CH<sub>3</sub>CN)<sub>4</sub>PF<sub>6</sub> (10 mol%), **L5** (12 mol%), Bases (2.0 equiv), MeOH (1.0 mL) at rt under Argon atmosphere for 24 h. <sup>b</sup>isolated yield. <sup>c</sup>Determined by chiral HPLC analysis.

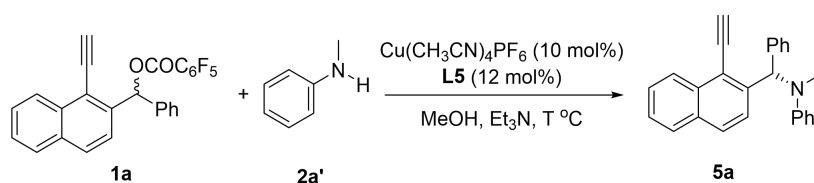

Table S7 Temperature screening<sup>a</sup>

| Entry          | M                                                   | Base              | Ligand    | Solvent | Time (h) | Yield (%) <sup>b</sup> | Er <sup>c</sup> |
|----------------|-----------------------------------------------------|-------------------|-----------|---------|----------|------------------------|-----------------|
| 1              | Cu(CH <sub>3</sub> CN) <sub>4</sub> PF <sub>6</sub> | Et <sub>3</sub> N | <b>L5</b> | MeOH    | 24       | 89                     | 93:7            |
| 2 <sup>d</sup> | Cu(CH <sub>3</sub> CN) <sub>4</sub> PF <sub>6</sub> | Et <sub>3</sub> N | <b>L5</b> | MeOH    | 24       | 62                     | 92:8            |

<sup>a</sup>Reaction conditions: **1a** (0.1 mmol), **2a'** (0.2 mmol), Cu(CH<sub>3</sub>CN)<sub>4</sub>PF<sub>6</sub> (10 mol%), **L5** (12 mol%), Et<sub>3</sub>N (2.0 equiv), MeOH (1.0 mL) under Argon atmosphere. <sup>b</sup>isolated yield. <sup>c</sup>Determined by chiral HPLC analysis. <sup>d</sup>0 °C.

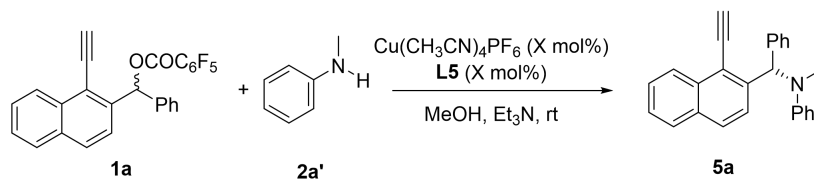

Table S8 Catalyst loading screening<sup>a</sup>

| Entry          | M                                                   | Base              | Ligand    | Solvent | Time (h) | Yield (%) <sup>b</sup> | Er <sup>c</sup> |
|----------------|-----------------------------------------------------|-------------------|-----------|---------|----------|------------------------|-----------------|
| 1              | Cu(CH <sub>3</sub> CN) <sub>4</sub> PF <sub>6</sub> | Et <sub>3</sub> N | <b>L5</b> | MeOH    | 24       | 89                     | 93:7            |
| 2 <sup>e</sup> | Cu(CH <sub>3</sub> CN) <sub>4</sub> PF <sub>6</sub> | Et <sub>3</sub> N | <b>L5</b> | MeOH    | 24       | 78                     | 90:10           |

<sup>a</sup>Reaction conditions: **1a** (0.1 mmol), **2a'** (0.2 mmol), Cu(CH<sub>3</sub>CN)<sub>4</sub>PF<sub>6</sub> (10 mol%), **L5** (12 mol%), Et<sub>3</sub>N (2.0 equiv), MeOH (1.0 mL) under Argon atmosphere. <sup>b</sup>isolated yield. <sup>c</sup>Determined by chiral HPLC analysis. <sup>e</sup>Cu(CH<sub>3</sub>CN)<sub>4</sub>PF<sub>6</sub> (5 mol%), **L5** (6 mol%)

### III Experimental Section

(1-ethynynaphthalen-2-yl)(phenyl)methyl 2,3,4,5,6-pentafluorobenzoate synthesized according to reported procedures.<sup>[1-2]</sup>

#### 1. General procedure for synthesis of Compounds 1.

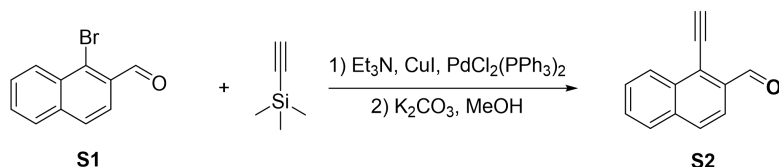

$PdCl_2(PPh_3)_2$  (0.5 mmol, 351 mg),  $CuI$  (1.0 mmol, 190 mg) and **S1** (10.0 mmol, 2.35 g) were dissolved in THF (40 mL) a Schlenk flask, followed by addition of trimethylsilylethyne (15.0 mmol, 2.1 mL) and  $Et_3N$  (30 mL). The reaction mixture was stirred at reflux for 3 hours, then cooled to 25 °C. The mixture was filtered through a pad of Celite/silica, and the pad was washed with  $Et_2O$ . The filtrate was concentrated under reduced pressure. The residue was treated with  $K_2CO_3$  (2.7 g, 20 mmol) pellets in MeOH at 0 °C for 1 hour. The resulting mixture was quenched with 1M HCl and extracted with  $CH_2Cl_2$ . The combined organic layers were washed with brine, dried over  $Na_2SO_4$  filtered, and concentrated under reduced pressure. The crude product was purified by column chromatography on silica gel (200-300 mesh, PE/EtOAc = 19/1) to obtain **S2**.

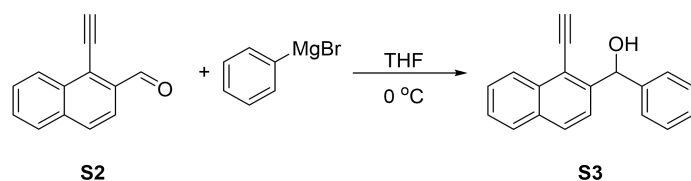

Add  $PhMgBr$  (5.4 ml, 15 mmol, 2.8 M) to a solution of **S2** (10 mmol) in THF at 0 °C. Allow the reaction mixture to warm to room temperature and stir for 3 hours. After completion (TLC analysis), quench the reaction with saturated aqueous  $NH_4Cl$  solution. Extract the mixture with EtOAc. Wash the combined organic layer with brine. Dry the combined organic layers over  $Na_2SO_4$ . Remove the solvent under reduced pressure. Purify the material by flash column chromatography using (200-300 mesh, PE/EtOAc = 9/1) to obtain **S3**.

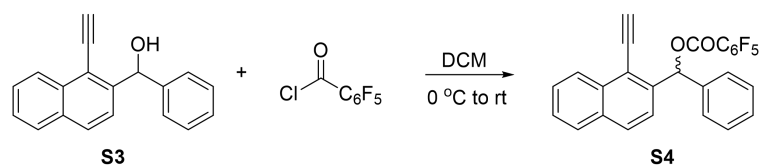

The **S3** (10 mmol) is dissolved in DCM, and pentafluorophenyl chloride (2.8 g, 12 mmol) is added dropwise at 0 °C, and then stirred at room temperature. After completion (TLC analysis), quench the reaction with saturated aqueous  $\text{NH}_4\text{Cl}$  solution. Extract the mixture with DCM. Wash the combined organic layer with brine. Dry the combined organic layers over  $\text{Na}_2\text{SO}_4$ . Remove the solvent under reduced pressure. Purify the material by flash column chromatography using (200-300 mesh, PE/EtOAc = 10/1) to obtain **S4**.

## 2. General procedure for synthesis of Compounds 3.

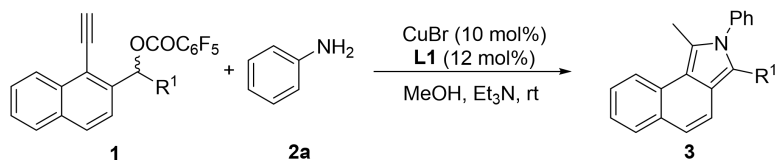

An oven-dried 10 mL Schlenk tube, fitted with a magnetic stirring bar, was charged with  $\text{CuBr}$  (1.4 mg, 0.01 mmol, 10 mol%) in an Argon atmosphere, followed by the addition of **L1** (3.7 mg, 0.012 mmol, 12 mol%) and MeOH (1.0 mL), with the mixture being stirred at room temperature for 1 hour. Following this, **1** (0.1 mmol, 1.0 equiv), **2a** (11.2 mg, 0.12 mmol, 1.2 equiv) and  $\text{Et}_3\text{N}$  (27.9  $\mu\text{L}$ , 0.2 mmol, 2.0 equiv) were introduced into the aforementioned reaction mixture. Following the completion of the reaction (monitored using TLC), the crude product underwent direct flash column chromatography on silica gel (200-300 mesh, PE/EtOAc = 10/1 - 15/1) to produce the respective products **3**.

## 3. General procedure for synthesis of Compounds 4.

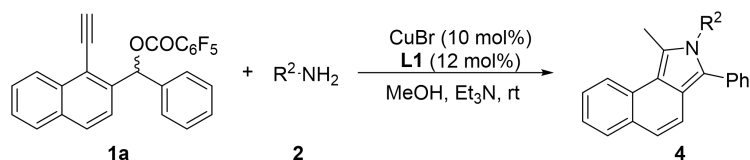

An oven-dried 10 mL Schlenk tube, fitted with a magnetic stirring bar, was charged with  $\text{CuBr}$  (1.4 mg, 0.01 mmol, 10 mol%) in an Argon atmosphere, followed by the addition of **L1** (3.7 mg, 0.012 mmol, 12 mol%) and MeOH (1.0 mL), and the

mixture was stirred at room temperature for 1 hour. Following this, **1a** (45.2 mg, 0.1 mmol, 1.0 equiv), **2** (0.12 mmol, 1.2 equiv) and Et<sub>3</sub>N (27.9 μL, 0.2 mmol, 2.0 equiv) were introduced into the aforementioned reaction mixture. Following the completion of the reaction (monitored using TLC), the crude product underwent direct flash column chromatography on silica gel (200-300 mesh, PE/EtOAc = 10/1-15/1) to produce the respective products **4**.

#### 4. General procedure for synthesis of Compounds **5**.

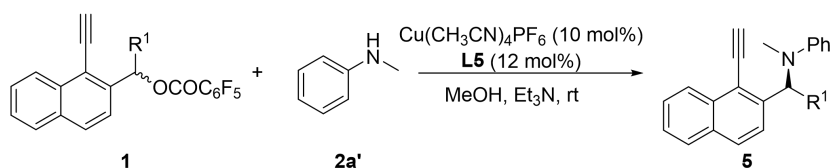

An oven-dried 10 mL Schlenk tube, fitted with a magnetic stirring bar, was charged with Cu(CH<sub>3</sub>CN)<sub>4</sub>PF<sub>6</sub> (3.7 mg, 0.01 mmol, 10 mol%) under an argon atmosphere, followed by the addition of **L5** (3.9 mg, 0.012 mmol, 12 mol%) and MeOH (1.0 mL), and the mixture was stirred at room temperature for 1 hour. Following this, **1** (0.1 mmol, 1.0 equiv), **2a'** (12.9 mg, 0.12 mmol, 1.2 equiv) and Et<sub>3</sub>N (27.9 μL, 0.2 mmol, 2.0 equiv) were introduced into the aforementioned reaction mixture. Following the completion of the reaction (monitored using TLC), the crude product underwent direct flash column chromatography on silica gel (200-300 mesh, PE/EtOAc = 10/1 - 15/1) to produce the respective products **5**.

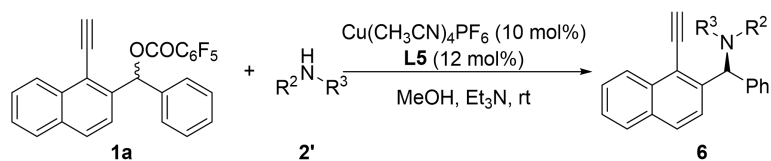

An oven-dried 10 mL Schlenk tube, fitted with a magnetic stirring bar, was charged with Cu(CH<sub>3</sub>CN)<sub>4</sub>PF<sub>6</sub> (3.7 mg, 0.01 mmol, 10 mol%) under an argon atmosphere, followed by the addition of **L5** (3.9 mg, 0.012 mmol, 12 mol%) and MeOH (1.0 mL), and the mixture was stirred at room temperature for 1 hour. Following this, **1a** (45.2 mg, 0.1 mmol, 1.0 equiv), **2'** (0.12 mmol, 1.2 equiv) and Et<sub>3</sub>N (27.9 μL, 0.2 mmol, 2.0 equiv) were introduced into the reaction mixture. Following the completion of the reaction (monitored using TLC), the crude product underwent direct flash column chromatography on silica gel (200-300 mesh,

PE/EtOAc v/v = 10:1 - 15:1 as the eluent) to produce the respective products **6**.

### 5. General procedure for gram-scale experiments with lower catalyst loading.

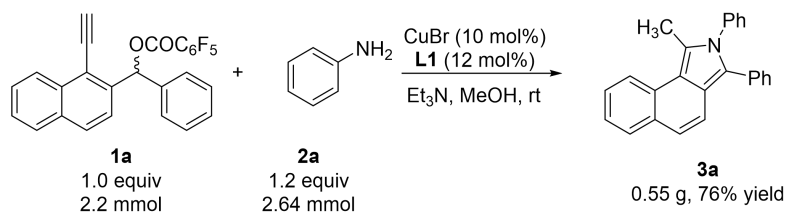

An oven-dried 50 mL Schlenk tube, fitted with a magnetic stirring bar, was charged with CuBr (30.8 mg, 0.22 mmol, 10 mol%) under an argon atmosphere, followed by the addition of **L1** (97.7 mg, 0.26 mmol, 12 mol%) and MeOH (22.0 mL), and the mixture was stirred at room temperature for 1 hour. Following this, **1a** (1.0 g, 2.2 mmol, 1.0 equiv), **2a** (0.25 g, 2.64 mmol, 1.2 equiv) and Et<sub>3</sub>N (0.61 mL, 4.4 mmol, 2.0 equiv) were introduced into the reaction mixture. Following the completion of the reaction (monitored using TLC), the crude product underwent direct flash column chromatography on silica gel (200-300 mesh, PE/EtOAc = 10/1 - 15/1 as the eluent) to produce the respective products **3a**.

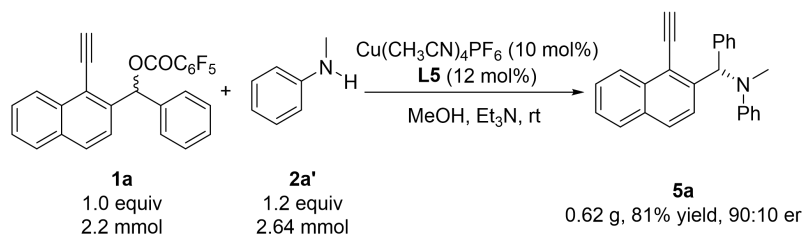

An oven-dried 50 mL Schlenk tube, fitted with a magnetic stirring bar, was charged with Cu(CH<sub>3</sub>CN)<sub>4</sub>PF<sub>6</sub> (81.4 mg, 0.22 mmol, 10 mol%) under an Ar atmosphere, followed by the addition of **L5** (96.8 mg, 0.26 mmol, 12 mol%) and MeOH (22.0 mL), and the mixture was stirred at room temperature for 1 hour. Following this, **1a** (1.0 g, 2.2 mmol, 1.0 equiv), **2a'** (250 mg, 2.64 mmol, 1.2 equiv) and Et<sub>3</sub>N (0.61 mL, 4.4 mmol, 2.0 equiv) were introduced into the reaction mixture. Following the completion of the reaction (monitored using TLC), the raw product underwent direct flash column chromatography on silica gel (200-300 mesh, PE/EtOAc = 10/1 - 15/1) to produce the respective products **5a**.

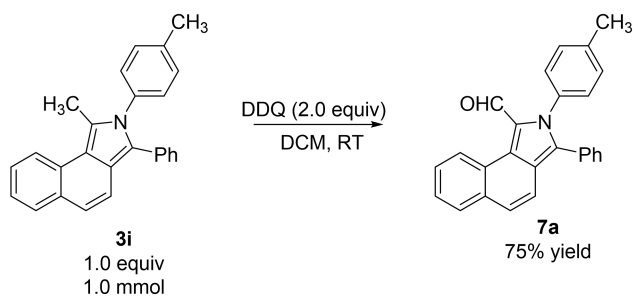

A dried 10 mL reaction tube containing a magnetic stir bar was charged with **3i** (34.7 mg, 0.1 mmol, 1.0 equiv), then DDQ was added (45.4 mg, 0.2 mmol, 2.0 equiv) and DCM (1.0 mL) and the mixture was stirred at room temperature for 1 hour. After the reaction was complete (monitored by TLC), purify the crude the crude product was directly purified by silica gel column chromatography (200-300 mesh, PE/EtOAc = 5/1 – 3/1) to obtain the corresponding product **7a** (27.1 mg, 75% yield).

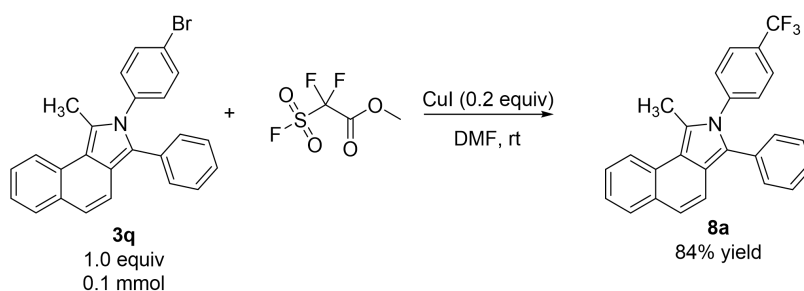

**3q** (41.2 mg, 0.1 mmol), methyl 2,2-difluoro-2-(fluorosulfonyl)acetate (38.4 mg, 0.2 mmol) and CuI (3.8 mg, 0.02 mmol) was purified in DMF (1 mL). After completion of the reaction was confirmed by TLC, the reaction was quenched by water and the product was extracted with solvent EtOAc. The organic layers were dried over Na<sub>2</sub>SO<sub>4</sub> and filtered. After concentration, the residue was purified by flash column chromatography (200-300 mesh, PE /EA = 5/1) to give the desired product amide **8a**.

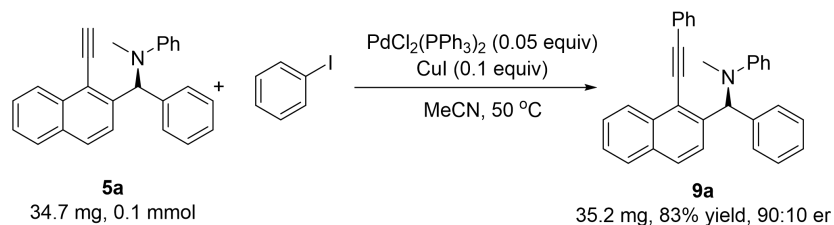

A mixture **5a** (34.7 mg, 0.1 mmol, 1.0 equiv), iodobenzene (22.4 mg, 0.11 mmol, 1.1 equiv), PdCl<sub>2</sub>(PPh<sub>3</sub>)<sub>2</sub> (3.5 mg, 0.005 mmol, 0.05 equiv), CuI (1.9 mg, 0.01 mmol,

0.1 equiv) and Et<sub>3</sub>N (42 μL, 3.0 equiv) in MeCN (1 mL) was dissolved under argon atmosphere. Stir the reaction mixture at 50 °C for 12 hours. Cool the reaction mixture to 25 °C. Pour the reaction mixture into water (3 mL). Extract the reaction mixture with EtOAc (3 × 5 mL). Wash the organic layer with brine (2 × 5 mL). Dry the combined organic layers over MgSO<sub>4</sub> and filter. After concentration, the residue was purified by flash column chromatography (200-300 mesh, PE /EA = 10/1) to give the desired product amide **9a**.

## 6. Characterization data of ligands **3a-3y**, **4a-4e**, **5a-5n**, **6a-6h**, **7a**, **8a**, **9a**.

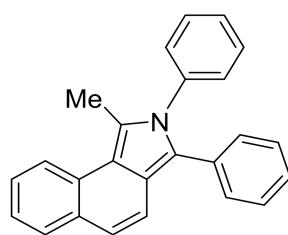

**3a**

**1-methyl-2,3-diphenyl-2H-benzo[e]isoindole (3a)**. Yellow oil (31.7 mg, 95% yield). <sup>1</sup>H NMR (400 MHz, CDCl<sub>3</sub>) δ = 8.29 (d, *J* = 8.1 Hz, 1H), 7.72 (d, *J* = 7.8 Hz, 1H), 7.56-7.46 (m, 2H), 7.40-7.34 (m, 4H), 7.24-7.12 (m, 8H), 2.75-2.69 (m, 3H). <sup>13</sup>C NMR (100 MHz, CDCl<sub>3</sub>) δ = 138.7, 132.4, 131.9, 130.1, 129.7, 129.3, 129.0, 128.6, 128.2, 128.1, 126.2, 126.2, 125.0, 124.1, 123.3, 123.1, 120.5, 120.0, 116.8, 14.3. HRMS (APCI) *m/z* calcd for C<sub>25</sub>H<sub>19</sub>NH<sup>+</sup> (*M*+H)<sup>+</sup> 334.1590, found 334.1590.

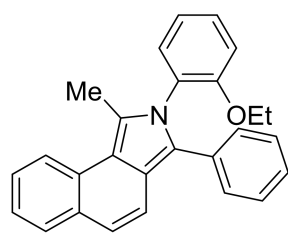

**3b**

**2-(2-ethoxyphenyl)-1-methyl-3-phenyl-2H-benzo[e]isoindole (3b)**. Yellow oil (32.5 mg, 86% yield). <sup>1</sup>H NMR (400 MHz, CDCl<sub>3</sub>) δ = 8.21 (d, *J* = 8.1 Hz, 1H), 7.63 (d, *J* = 7.8 Hz, 1H), 7.48 (d, *J* = 9.0 Hz, 1H), 7.39 (t, *J* = 7.6 Hz, 1H), 7.29-7.21 (m, 2H), 7.15-7.09 (m, 5H), 7.06-7.02 (m, 1H), 6.98-6.96 (m, 1H), 6.87-6.79 (m, 2H), 3.93-3.84 (m, 1H), 3.78-3.71 (m, 1H), 2.57 (s, 3H), 1.07 (t, *J* = 7.0 Hz, 3H). <sup>13</sup>C NMR (100 MHz, CDCl<sub>3</sub>) δ = 155.1, 132.8, 131.8, 131.0, 130.0, 129.8, 129.6, 128.5, 128.0,

127.6, 126.1, 126.0, 125.1, 123.8, 123.6, 123.5, 123.3, 120.5, 120.3, 120.1, 116.4, 112.7, 63.9, 14.7, 13.9. HRMS (APCI)  $m/z$  calcd for  $C_{27}H_{23}NOH^+$  ( $M+H$ ) $^+$  378.1852, found 378.1852.

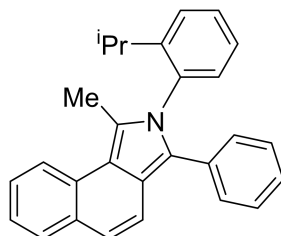

**3c**

**2-(2-isopropylphenyl)-1-methyl-3-phenyl-2H-benzo[e]isoindole (3c).** Yellow solid (30.3 mg, 81% yield). Mp: 110.9-111.3 °C.  $^1H$  NMR (400 MHz,  $CDCl_3$ )  $\delta$  = 8.30 (d,  $J$  = 8.1 Hz, 1H), 7.74 (d,  $J$  = 7.8 Hz, 1H), 7.60 (d,  $J$  = 9.1 Hz, 1H), 7.49 (t,  $J$  = 7.6 Hz, 1H), 7.43-7.36 (m, 3H), 7.33-7.18 (m, 7H), 7.12 (t,  $J$  = 7.0 Hz, 1H), 2.62 (s, 3H), 2.25-2.15 (m, 1H), 0.92 (d,  $J$  = 6.9 Hz, 3H), 0.57 (d,  $J$  = 6.8 Hz, 3H).  $^{13}C$  NMR (100 MHz,  $CDCl_3$ )  $\delta$  = 147.2, 136.2, 131.8, 130.1, 130.1, 129.8, 129.5, 128.6, 128.1, 126.9, 126.3, 126.2, 126.0, 125.5, 124.1, 123.9, 123.3, 123.2, 120.3, 120.0, 27.5, 24.5, 22.4, 14.1. HRMS (APCI)  $m/z$  calcd for  $C_{28}H_{25}NH^+$  ( $M+H$ ) $^+$  376.2060, found 376.2054.

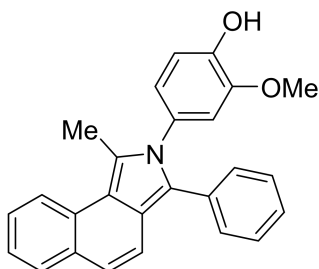

**3d**

**2-methoxy-4-(1-methyl-3-phenyl-2H-benzo[e]isoindol-2-yl)phenol (3d).** yellow solid (35.6 mg, 94% yield). Mp: 184.4-184.7 °C.  $^1H$  NMR (400 MHz,  $CDCl_3$ )  $\delta$  = 8.30 (d,  $J$  = 8.0 Hz, 1H), 7.74-7.71 (m, 1H), 7.55-7.47 (m, 2H), 7.39-7.35 (m, 1H), 7.25-7.15 (m, 6H), 6.95 (d,  $J$  = 8.3 Hz, 1H), 6.81 (dd,  $J$  = 8.3, 2.3 Hz, 1H), 6.61 (d,  $J$  = 2.2 Hz, 1H), 3.70 (s, 3H), 2.75 (s, 3H), 1.08 (t,  $J$  = 7.2 Hz, 1H).  $^{13}C$  NMR (100 MHz,  $CDCl_3$ )  $\delta$  = 146.6, 145.5, 132.6, 131.9, 130.9, 130.0, 129.7, 128.6, 128.2, 126.2, 126.1, 125.1, 124.1, 124.0, 123.3, 123.2, 122.2, 120.3, 120.0, 114.3, 112.2, 56.3, 14.3. HRMS (APCI)  $m/z$  calcd for  $C_{26}H_{21}NO_2H^+$  ( $M+H$ ) $^+$  380.1645, found 380.1646.

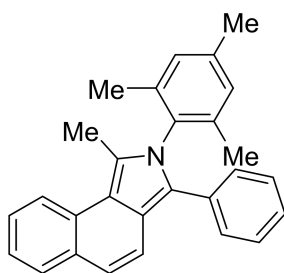

**3e**

**2-mesityl-1-methyl-3-phenyl-2H-benzo[e]isoindole (3e).** Yellow solid (33.8 mg, 90% yield). Mp: 94.7-95.1 °C. <sup>1</sup>H NMR (400 MHz, CDCl<sub>3</sub>) δ = 8.30 (d, *J* = 8.1 Hz, 1H), 7.74 (d, *J* = 7.8 Hz, 1H), 7.62 (d, *J* = 9.1 Hz, 1H), 7.49 (t, *J* = 7.6 Hz, 1H), 7.37 (t, *J* = 7.5 Hz, 1H), 7.24-7.18 (m, 5H), 7.17-7.11 (m, 1H), 6.90 (s, 2H), 2.56 (s, 3H), 2.31 (s, 3H), 1.82 (s, 6H). <sup>13</sup>C NMR (100 MHz, CDCl<sub>3</sub>) δ = 138.4, 136.5, 134.4, 132.6, 131.8, 130.0, 129.1, 129.0, 128.6, 128.3, 126.2, 126.1, 123.9, 123.9, 123.5, 123.3, 121.7, 120.5, 120.4, 116.9, 21.3, 17.9, 13.1. HRMS (APCI) *m/z* calcd for C<sub>28</sub>H<sub>25</sub>NH<sup>+</sup> (M+H)<sup>+</sup> 376.2060, found 376.2060.

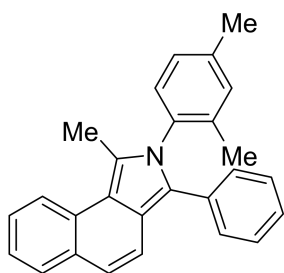

**3f**

**2-(2,4-dimethylphenyl)-1-methyl-3-phenyl-2H-benzo[e]isoindole (3f).** Yellow oil (33.1 mg, 92% yield). <sup>1</sup>H NMR (400 MHz, CDCl<sub>3</sub>) δ = 8.21 (d, *J* = 8.1 Hz, 1H), 7.65 (d, *J* = 7.8 Hz, 1H), 7.49 (d, *J* = 9.1 Hz, 1H), 7.40 (t, *J* = 7.6 Hz, 1H), 7.28 (t, *J* = 7.5 Hz, 1H), 7.15-7.13 (m, 5H), 7.08-7.03 (m, 2H), 6.96 (d, *J* = 10.4 Hz, 2H), 2.52 (s, 3H), 2.27 (s, 3H), 1.70 (s, 3H). <sup>13</sup>C NMR (100 MHz, CDCl<sub>3</sub>) δ = 138.6, 136.4, 135.2, 132.5, 131.8, 131.5, 129.9, 129.7, 129.5, 128.6, 128.2, 127.2, 126.2, 126.1, 124.9, 124.0, 123.7, 123.3, 122.7, 116.6, 21.3, 17.5, 13.7. HRMS (APCI) *m/z* calcd for C<sub>27</sub>H<sub>23</sub>NH<sup>+</sup> (M+H)<sup>+</sup> 362.1903, found 362.1903.

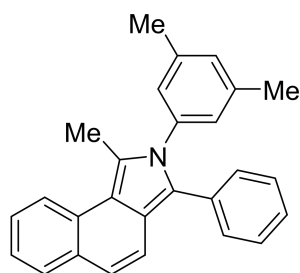

**3g**

**2-(3,5-dimethylphenyl)-1-methyl-3-phenyl-2H-benzo[e]isoindole (3g).** Yellow oil (30.5 mg, 84% yield).  $^1\text{H}$  NMR (400 MHz,  $\text{CDCl}_3$ )  $\delta$  = 8.29 (d,  $J$  = 8.1 Hz, 1H), 7.71 (d,  $J$  = 7.8 Hz, 1H), 7.54 (d,  $J$  = 9.1 Hz, 1H), 7.50-7.45 (m, 1H), 7.38-7.34 (m, 1H), 7.25-7.19 (m, 5H), 7.23-7.13 (m, 1H), 6.98 (s, 1H), 6.80 (s, 2H), 2.71 (s, 3H), 2.28 (s, 6H).  $^{13}\text{C}$  NMR (100 MHz,  $\text{CDCl}_3$ )  $\delta$  = 138.6, 138.5, 132.6, 131.9, 130.0, 129.8, 128.6, 128.1, 127.0, 126.1, 124.0, 123.8, 123.3, 123.1, 120.3, 120.1, 21.3, 14.3. HRMS (APCI)  $m/z$  calcd for  $\text{C}_{27}\text{H}_{23}\text{NH}^+$  ( $\text{M}+\text{H}$ ) $^+$  362.1903, found 362.1904.

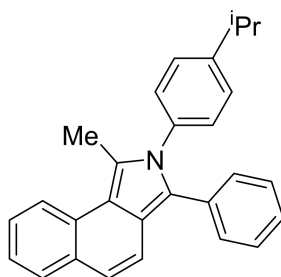

**3h**

**2-(4-isopropylphenyl)-1-methyl-3-phenyl-2H-benzo[e]isoindole (3h).** Yellow oil (31.7 mg, 84% yield).  $^1\text{H}$  NMR (400 MHz,  $\text{CDCl}_3$ )  $\delta$  = 8.21 (d,  $J$  = 8.1 Hz, 1H), 7.63 (d,  $J$  = 7.8 Hz, 1H), 7.48-7.45 (m, 1H), 7.39 (t,  $J$  = 7.5 Hz, 1H), 7.27 (t,  $J$  = 7.6 Hz, 1H), 7.13 (d,  $J$  = 8.5 Hz, 7H), 7.09-7.04 (m, 1H), 7.01 (d,  $J$  = 8.3 Hz, 2H), 2.84 (p,  $J$  = 7.2 Hz, 1H), 2.63 (s, 3H), 1.17 (d,  $J$  = 6.9 Hz, 6H).  $^{13}\text{C}$  NMR (100 MHz,  $\text{CDCl}_3$ )  $\delta$  = 148.9, 136.2, 132.6, 131.9, 130.1, 129.8, 129.0, 128.6, 128.1, 127.0, 126.1, 124.0, 123.9, 123.3, 123.2, 120.4, 120.0, 33.9, 24.1, 14.3. HRMS (APCI)  $m/z$  calcd for  $\text{C}_{28}\text{H}_{25}\text{NH}^+$  ( $\text{M}+\text{H}$ ) $^+$  376.2060, found 376.2061.

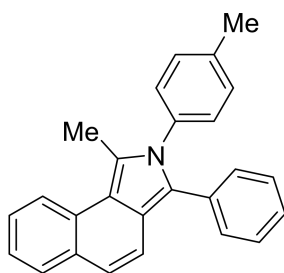

**3i**

**1-methyl-3-phenyl-2-(p-tolyl)-2H-benzo[e]isoindole (3i).** Yellow solid (31.0 mg, 89% yield). Mp: 173.3-174.0 °C.  $^1\text{H}$  NMR (400 MHz,  $\text{CDCl}_3$ )  $\delta$  = 8.22 (d,  $J$  = 8.1 Hz, 1H), 7.64 (d,  $J$  = 7.7 Hz, 1H), 7.48-7.39 (m, 2H), 7.29 (t,  $J$  = 7.3 Hz, 1H), 7.18-7.07 (m, 8H), 7.00 (d,  $J$  = 8.2 Hz, 2H), 2.64 (s, 3H), 2.31 (s, 3H).  $^{13}\text{C}$  NMR (100 MHz,  $\text{CDCl}_3$ )  $\delta$  = 138.0, 136.0, 132.6, 131.9, 130.1, 129.8, 129.7, 129.0, 128.6, 128.2, 126.1, 126.1, 124.0, 123.9, 123.3, 123.2, 116.7, 21.3, 14.3. HRMS (APCI)  $m/z$  calcd for  $\text{C}_{26}\text{H}_{21}\text{NH}^+$  ( $\text{M}+\text{H}$ ) $^+$  348.1747, found 348.1747.

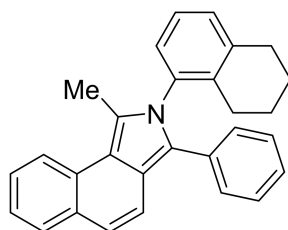

**3j**

**1-methyl-3-phenyl-2-(5,6,7,8-tetrahydronaphthalen-1-yl)-2H-benzo[e]isoindole (3j).** Yellow oil (33.9 mg, 88% yield).  $^1\text{H}$  NMR (400 MHz,  $\text{CDCl}_3$ )  $\delta$  = 8.29 (d,  $J$  = 8.1 Hz, 1H), 7.73 (d,  $J$  = 7.8 Hz, 1H), 7.57 (d,  $J$  = 9.1 Hz, 1H), 7.48 (t,  $J$  = 7.2 Hz, 1H), 7.36 (t,  $J$  = 7.2 Hz, 1H), 7.23-7.21 (m, 5H), 7.17-7.07 (m, 4H), 2.76 (d,  $J$  = 6.4 Hz, 2H), 2.61 (s, 3H), 2.04-2.02 (m, 2H), 1.70-1.50 (m, 4H).  $^{13}\text{C}$  NMR (100 MHz,  $\text{CDCl}_3$ )  $\delta$  = 137.6, 136.2, 131.8, 129.9, 129.8, 129.7, 128.6, 128.2, 127.0, 126.2, 126.1, 125.6, 124.6, 124.0, 123.7, 123.3, 122.4, 120.3, 29.5, 24.9, 22.9, 22.5, 13.7. HRMS (APCI)  $m/z$  calcd for  $\text{C}_{29}\text{H}_{25}\text{NH}^+$  ( $\text{M}+\text{H}$ ) $^+$  388.2060, found 388.2060.

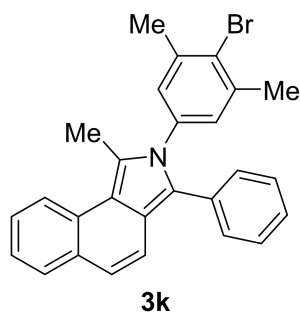

**2-(4-bromo-3,5-dimethylphenyl)-1-methyl-3-phenyl-2H-benzo[e]isoindole (3k).**

Yellow oil (36.7 mg, 83% yield). <sup>1</sup>H NMR (400 MHz, CDCl<sub>3</sub>) δ = 8.28 (d, *J* = 8.0 Hz, 1H), 7.72 (d, *J* = 7.7 Hz, 1H), 7.53-7.46 (m, 2H), 7.39-7.35 (m, 1H), 7.28-7.16 (m, 6H), 6.92 (s, 2H), 2.70 (s, 3H), 2.38 (s, 6H). <sup>13</sup>C NMR (100 MHz, CDCl<sub>3</sub>) δ = 139.2, 137.1, 132.3, 131.9, 130.0, 129.7, 128.7, 128.6, 128.3, 127.3, 126.3, 126.2, 124.9, 124.1, 124.1, 123.3, 123.0, 120.5, 120.0, 116.9, 24.1, 14.3. HRMS (APCI) *m/z* calcd for C<sub>27</sub>H<sub>22</sub>BrNH<sup>+</sup> (M+H)<sup>+</sup> 440.1008, found 440.1003.

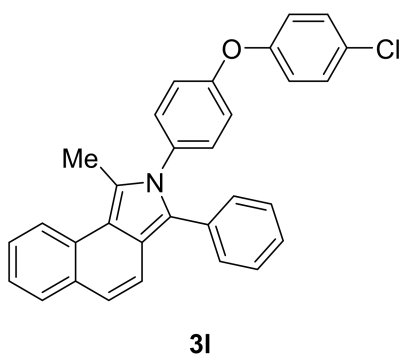

**2-(4-(4-chlorophenoxy)phenyl)-1-methyl-3-phenyl-2H-benzo[e]isoindole (3l).**

Yellow oil (36.1 mg, 79% yield). <sup>1</sup>H NMR (400 MHz, CDCl<sub>3</sub>) δ = 8.21 (d, *J* = 8.0 Hz, 1H), 7.64 (d, *J* = 7.6 Hz, 1H), 7.46-7.40 (m, 2H), 7.31-7.30 (m, 1H), 7.25-7.06 (m, 10H), 6.92-6.86 (m, 4H), 2.66 (s, 3H). <sup>13</sup>C NMR (100 MHz, CDCl<sub>3</sub>) δ = 156.8, 155.3, 133.9, 132.4, 131.9, 130.7, 130.2, 130.1, 129.7, 129.1, 128.8, 128.7, 128.3, 126.9, 126.3, 126.2, 124.2, 123.3, 123.1, 120.5, 119.9, 118.8, 14.3. HRMS (APCI) *m/z* calcd for C<sub>31</sub>H<sub>22</sub>ClNOH<sup>+</sup> (M+H)<sup>+</sup> 460.1463, found 460.1463.

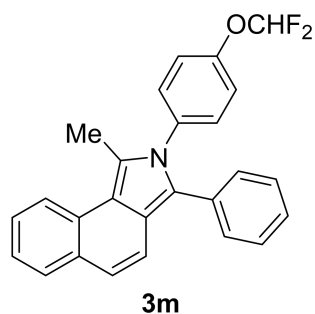

**2-(4-(difluoromethoxy)phenyl)-1-methyl-3-phenyl-2H-benzo[e]isoindole (3m).**

Yellow oil (30.8 mg, 77% yield). <sup>1</sup>H NMR (400 MHz, CDCl<sub>3</sub>) δ = 8.29 (d, *J* = 8.1 Hz, 1H), 7.73 (d, *J* = 7.8 Hz, 1H), 7.54-7.48 (m, 2H), 7.38 (d, *J* = 6.7 Hz, 1H), 7.28-7.12 (m, 11H), 2.73 (s, 3H). <sup>13</sup>C NMR (100 MHz, CDCl<sub>3</sub>) δ = 150.6, 135.8, 132.2, 130.6, 129.6, 128.7, 128.4, 126.4, 126.3, 124.3, 123.4, 123.0, 120.6, 119.9, 118.4, 117.0, 115.8, 14.3. <sup>19</sup>F NMR (376 MHz, CDCl<sub>3</sub>) δ = -81.3. HRMS (APCI) *m/z* calcd for C<sub>26</sub>H<sub>19</sub>F<sub>2</sub>NOH<sup>+</sup> (M+H)<sup>+</sup> 400.1507, found 400.1509.

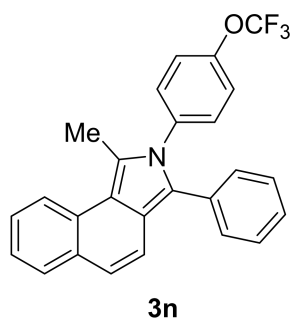

**1-methyl-3-phenyl-2-(4-(trifluoromethoxy)phenyl)-2H-benzo[e]isoindole (3n).**

Yellow oil (33.7 mg, 81% yield). <sup>1</sup>H NMR (400 MHz, CDCl<sub>3</sub>) δ = 8.19 (d, *J* = 8.1 Hz, 1H), 7.63 (d, *J* = 7.8 Hz, 1H), 7.45-7.38 (m, 2H), 7.32-7.27 (m, 1H), 7.17-7.05 (m, 10H), 2.62 (s, 3H). <sup>13</sup>C NMR (100 MHz, CDCl<sub>3</sub>) δ = 148.7, 137.2, 132.1, 130.7, 130.1, 129.6, 128.7, 128.4, 126.5, 126.3, 125.1, 124.4, 123.4, 123.0, 121.4, 120.7, 119.8, 117.1, 14.3. <sup>19</sup>F NMR (376 MHz, CDCl<sub>3</sub>) δ = -58.4. HRMS (APCI) *m/z* calcd for C<sub>26</sub>H<sub>18</sub>F<sub>3</sub>NOH<sup>+</sup> (M+H)<sup>+</sup> 418.1413, found 418.1416.

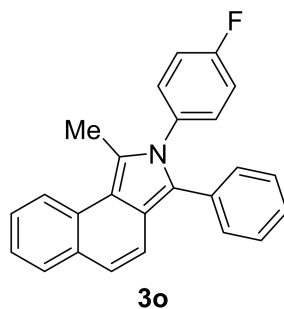

**2-(4-fluorophenyl)-1-methyl-3-phenyl-2H-benzo[e]isoindole (3o).** Yellow solid (32.3 mg, 92% yield). Mp: 124.3-124.6 °C. <sup>1</sup>H NMR (400 MHz, CDCl<sub>3</sub>) δ = 8.29 (d, *J* = 8.1 Hz, 1H), 7.73 (d, *J* = 7.4 Hz, 1H), 7.53-7.47 (m, 2H), 7.40-7.36 (m, 1H), 7.29-7.22 (m, 3H), 7.20-7.15 (m, 5H), 7.11-7.05 (m, 2H), 2.71 (s, 3H). <sup>13</sup>C NMR (100 MHz, CDCl<sub>3</sub>) δ = 132.0, 130.9, 130.8, 130.2, 129.6, 128.7, 128.3, 126.4, 126.2, 125.2, 124.2, 123.3, 123.1, 120.5, 119.9, 116.9, 116.2, 116.0, 14.2. <sup>19</sup>F NMR (376 MHz, CDCl<sub>3</sub>) δ = -113.1. HRMS (APCI) *m/z* calcd for C<sub>25</sub>H<sub>18</sub>FNH<sup>+</sup> (M+H)<sup>+</sup> 352.1496, found 352.1496.

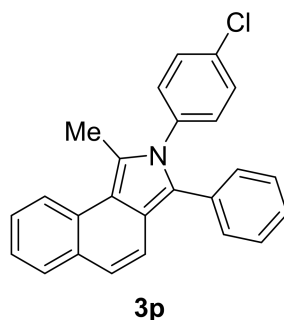

**2-(4-chlorophenyl)-1-methyl-3-phenyl-2H-benzo[e]isoindole (3p).** Yellow oil (30.9 mg, 84% yield). <sup>1</sup>H NMR (400 MHz, CDCl<sub>3</sub>) δ = 8.29 (d, *J* = 8.1 Hz, 1H), 7.73 (d, *J* = 7.5 Hz, 1H), 7.52-7.48 (m, 2H), 7.38 (d, *J* = 8.4 Hz, 3H), 7.30-7.27 (m, 1H), 7.23-7.25 (s, 1H), 7.22-7.13 (m, 6H), 2.73 (s, 3H). <sup>13</sup>C NMR (100 MHz, CDCl<sub>3</sub>) δ = 137.3, 134.1, 132.1, 132.0, 130.5, 130.2, 129.6, 129.3, 128.7, 128.4, 126.5, 126.3, 124.3, 124.3, 123.4, 120.7, 14.3. HRMS (APCI) *m/z* calcd for C<sub>25</sub>H<sub>18</sub>ClNH<sup>+</sup> (M+H)<sup>+</sup> 368.1201, found 368.1206.

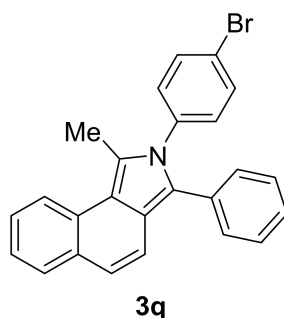

**2-(4-bromophenyl)-1-methyl-3-phenyl-2H-benzo[e]isoindole (3q).** Yellow oil (36.3 mg, 88% yield).  $^1\text{H}$  NMR (400 MHz,  $\text{CDCl}_3$ )  $\delta$  = 8.20 (d,  $J$  = 8.1 Hz, 1H), 7.66-7.62 (m, 1H), 7.45-7.39 (m, 4H), 7.32-7.28 (m, 1H), 7.22-7.13 (m, 3H), 7.12-7.08 (m, 3H), 7.01-6.95 (m, 2H), 2.63 (s, 3H).  $^{13}\text{C}$  NMR (100 MHz,  $\text{CDCl}_3$ )  $\delta$  = 137.8, 132.3, 132.1, 132.0, 130.8, 130.1, 129.6, 128.7, 128.4, 126.5, 126.3, 125.0, 124.3, 124.3, 123.4, 122.9, 120.7, 119.8, 117.1, 14.3. HRMS (APCI)  $m/z$  calcd for  $\text{C}_{25}\text{H}_{18}\text{BrNH}^+$  ( $\text{M}+\text{H}$ ) $^+$  412.0695, found 412.0694.

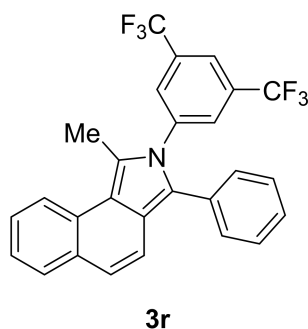

**2-(3,5-bis(trifluoromethyl)phenyl)-1-methyl-3-phenyl-2H-benzo[e]isoindole (3r).** Yellow solid (27.5 mg, 59% yield). Mp: 137.1-137.4 °C.  $^1\text{H}$  NMR (400 MHz,  $\text{CDCl}_3$ )  $\delta$  = 8.28 (d,  $J$  = 8.0 Hz, 1H), 7.88 (s, 1H), 7.74 (d,  $J$  = 7.2 Hz, 1H), 7.65 (s, 2H), 7.51-7.39 (m, 3H), 7.29-7.22 (m, 4H), 7.14-7.10 (m, 2H), 2.77 (s, 3H).  $^{13}\text{C}$  NMR (100 MHz,  $\text{CDCl}_3$ )  $\delta$  = 140.3, 132.8, 132.4, 132.1, 131.3, 130.3, 129.5, 129.3, 128.9, 128.7, 127.1, 126.5, 125.0, 124.7, 123.5, 122.4, 119.6, 117.8, 14.4.  $^{19}\text{F}$  NMR (376 MHz,  $\text{CDCl}_3$ )  $\delta$  = -63.0. HRMS (APCI)  $m/z$  calcd for  $\text{C}_{27}\text{H}_{17}\text{F}_6\text{N}$   $\text{H}^+$  ( $\text{M}+\text{H}$ ) $^+$  470.1338, found 470.1334.

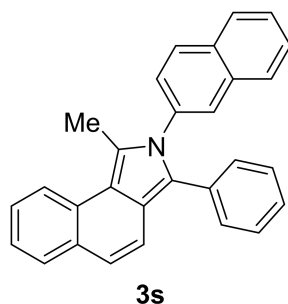

**1-methyl-2-(naphthalen-2-yl)-3-phenyl-2H-benzo[e]isoindole (3s).** Yellow solid (36.0 mg, 94% yield). Mp: 89.6-90.0 °C. <sup>1</sup>H NMR (400 MHz, CDCl<sub>3</sub>) δ = 8.23 (d, *J* = 8.1 Hz, 1H), 7.82-7.76 (m, 1H), 7.75-7.68 (m, 2H), 7.67-7.60 (m, 2H), 7.50-7.38 (m, 4H), 7.29 (t, *J* = 7.6 Hz, 1H), 7.20-7.13 (m, 4H), 7.08 (t, *J* = 7.5 Hz, 2H), 7.00 (t, *J* = 7.0 Hz, 1H), 2.65 (s, 3H). <sup>13</sup>C NMR (100 MHz, CDCl<sub>3</sub>) δ = 136.2, 133.2, 132.6, 132.4, 132.0, 130.1, 129.7, 128.9, 128.6, 128.3, 128.2, 128.0, 127.8, 127.1, 126.9, 126.2, 125.2, 124.1, 123.4, 120.6, 120.0, 116.9, 14.4. HRMS (APCI) *m/z* calcd for C<sub>29</sub>H<sub>21</sub>NH<sup>+</sup> (M+H)<sup>+</sup> 384.1747, found 384.1748.

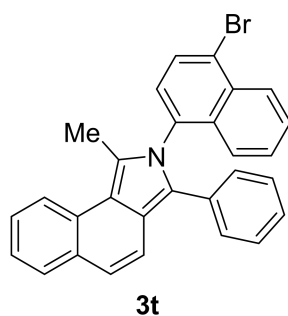

**2-(4-bromonaphthalen-1-yl)-1-methyl-3-phenyl-2H-benzo[e]isoindole (3t).** Yellow oil (40.2 mg, 87% yield). <sup>1</sup>H NMR (400 MHz, CDCl<sub>3</sub>) δ = 8.30 (d, *J* = 8.3 Hz, 2H), 7.78 (t, *J* = 8.6 Hz, 2H), 7.64-7.37 (m, 6H), 7.28-7.20 (m, 3H), 7.14-7.09 (m, 4H), 2.53 (s, 3H). <sup>13</sup>C NMR (100 MHz, CDCl<sub>3</sub>) δ = 135.4, 133.1, 132.1, 132.0, 129.7, 129.6, 128.6, 128.3, 127.8, 127.8, 126.6, 126.3, 124.3, 124.3, 124.0, 123.8, 123.4, 120.6, 120.1, 116.9, 14.0. HRMS (APCI) *m/z* calcd for C<sub>29</sub>H<sub>20</sub>BrNH<sup>+</sup> (M+H)<sup>+</sup> 462.0852, found 462.0850.

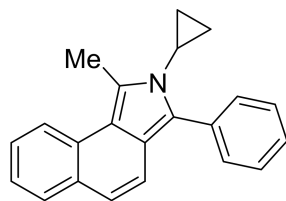

**3u**

**2-cyclopropyl-1-methyl-3-phenyl-2H-benzo[e]isoindole (3u).** Yellow solid (25.3 mg, 85% yield). Mp: 100.1-100.7 °C. <sup>1</sup>H NMR (400 MHz, CDCl<sub>3</sub>) δ = 8.26 (d, *J* = 8.1 Hz, 1H), 7.68 (dd, *J* = 7.8, 1.4 Hz, 1H), 7.56-7.53 (m, 2H), 7.49-7.43 (m, 4H), 7.36-7.31 (m, 2H), 7.13 (d, *J* = 9.1 Hz, 1H), 3.50-3.45 (m, 1H), 3.02 (s, 3H), 1.04-0.98 (m, 2H), 0.70-0.64 (m, 2H). <sup>13</sup>C NMR (100 MHz, CDCl<sub>3</sub>) δ = 133.2, 131.9, 130.0, 129.6, 128.5, 128.3, 126.0, 125.3, 124.4, 123.8, 123.3, 119.8, 119.5, 27.7, 14.4, 10.4. HRMS (APCI) *m/z* calcd for C<sub>22</sub>H<sub>19</sub>NH<sup>+</sup> (M+H)<sup>+</sup> 298.1590, found 298.1591.

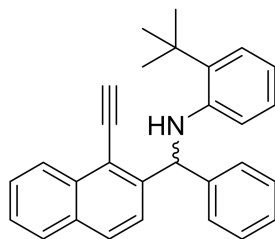

**3v**

**2-(tert-butyl)-N-((1-ethynyl-naphthalen-2-yl)(phenyl)methyl)aniline (3v).** Yellow solid (30.3 mg, 78% yield). Mp: 117.3-118.2 °C. <sup>1</sup>H NMR (400 MHz, CDCl<sub>3</sub>) δ = 8.33 (d, *J* = 8.3 Hz, 1H), 7.73 (t, *J* = 7.5 Hz, 2H), 7.62 (d, *J* = 8.6 Hz, 1H), 7.50 (t, *J* = 7.6 Hz, 1H), 7.43-7.38 (m, 3H), 7.20 (dt, *J* = 22.4, 6.9 Hz, 4H), 6.88 (t, *J* = 7.4 Hz, 1H), 6.63-6.56 (m, 1H), 6.43 (d, *J* = 7.7 Hz, 1H), 6.29 (s, 1H), 4.56 (s, 1H), 3.72 (s, 1H), 1.37 (s, 9H). <sup>13</sup>C NMR (100 MHz, CDCl<sub>3</sub>) δ = 145.3, 145.0, 142.8, 133.5, 129.9, 128.9, 128.3, 127.7, 127.6, 127.3, 127.3, 126.5, 126.4, 126.2, 124.1, 118.0, 117.6, 113.0, 88.7, 79.8, 61.3, 34.3, 30.1. HRMS (APCI) *m/z* calcd for C<sub>29</sub>H<sub>27</sub>NH<sup>+</sup> (M+H)<sup>+</sup> 390.2216, found 390.2215.

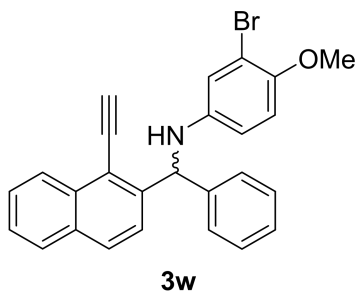

**3-bromo-N-((1-ethynyl)naphthalen-2-yl)(phenyl)methyl-4-methoxyaniline (3w).**

Yellow oil (36.7 mg, 83% yield).  $^1\text{H}$  NMR (400 MHz,  $\text{CDCl}_3$ )  $\delta$  = 8.30 (d,  $J$  = 8.27 Hz, 2H), 7.78 (t,  $J$  = 8.57 Hz, 2H), 7.64-7.37 (m, 6H), 7.28-7.20 (m, 3H), 7.14-7.09 (m, 4H), 2.53 (s, 3H).  $^{13}\text{C}$  NMR (100 MHz,  $\text{CDCl}_3$ )  $\delta$  = 135.4, 133.1, 132.1, 132.0, 129.7, 129.6, 128.6, 128.3, 127.8, 127.8, 126.6, 126.3, 124.3, 124.3, 124.0, 123.8, 123.4, 120.6, 120.1, 116.9, 14.0. HRMS (APCI)  $m/z$  calcd for  $\text{C}_{26}\text{H}_{20}\text{BrNOH}^+$  ( $\text{M}+\text{H}$ ) $^+$  442.0801, found 442.0800.

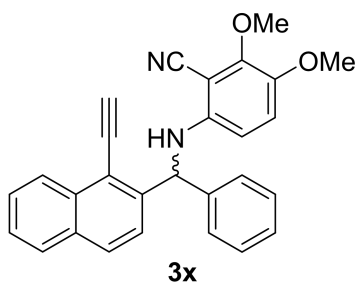

**6-(((1-ethynyl)naphthalen-2-yl)(phenyl)methyl)amino)-2,3-dimethoxybenzonitrile (3x).**

Yellow oil (38.9 mg, 93% yield).  $^1\text{H}$  NMR (400 MHz,  $\text{CDCl}_3$ )  $\delta$  = 8.30 (d,  $J$  = 8.4 Hz, 1H), 7.75 (dd,  $J$  = 16.4, 8.7 Hz, 2H), 7.55-7.48 (m, 2H), 7.45-7.36 (m, 3H), 7.28-7.18 (m, 3H), 6.74 (s, 1H), 6.40 (d,  $J$  = 5.1 Hz, 1H), 6.17 (s, 1H), 5.09 (s, 1H), 3.78 (s, 1H), 3.65 (s, 3H), 3.52 (s, 3H).  $^{13}\text{C}$  NMR (100 MHz,  $\text{CDCl}_3$ )  $\delta$  = 154.7, 146.4, 143.4, 141.2, 140.8, 133.7, 132.5, 130.4, 129.1, 128.4, 128.1, 127.6, 127.3, 126.9, 126.2, 123.8, 118.5, 114.3, 97.0, 88.6, 86.3, 79.6, 60.2, 56.6, 55.9. HRMS (APCI)  $m/z$  calcd for  $\text{C}_{28}\text{H}_{22}\text{N}_2\text{O}_2\text{H}^+$  ( $\text{M}+\text{H}$ ) $^+$  419.1754, found 419.1758.

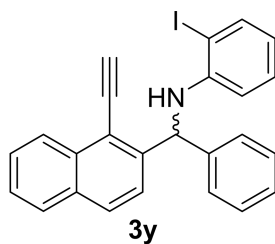

**N-((1-ethynyl)naphthalen-2-yl)(phenyl)methyl)-2-iodoaniline (3u).** Yellow oil (34.9 mg, 76% yield).  $^1\text{H}$  NMR (400 MHz,  $\text{CDCl}_3$ )  $\delta$  = 8.33 (d,  $J$  = 8.4 Hz, 1H), 7.73 (t,  $J$  = 8.6 Hz, 2H), 7.61-7.48 (m, 3H), 7.44-7.38 (m, 3H), 7.25 (t,  $J$  = 7.5 Hz, 2H), 7.20-7.16 (m, 1H), 7.00-6.91 (m, 1H), 6.40 (d,  $J$  = 7.9 Hz, 1H), 6.36-6.26 (m, 2H), 4.91 (d,  $J$  = 4.4 Hz, 1H), 3.74 (s, 1H).  $^{13}\text{C}$  NMR (100 MHz,  $\text{CDCl}_3$ )  $\delta$  = 146.3, 144.0, 141.8, 133.9, 132.5, 129.6, 128.9, 128.3, 127.8, 127.5, 127.4, 126.6, 126.4, 123.9, 119.3, 112.2, 88.7, 85.9, 79.7, 60.8. HRMS (APCI)  $m/z$  calcd for  $\text{C}_{25}\text{H}_{18}\text{INH}^+$  ( $\text{M}+\text{H}$ ) $^+$  460.0557, found 460.0559.

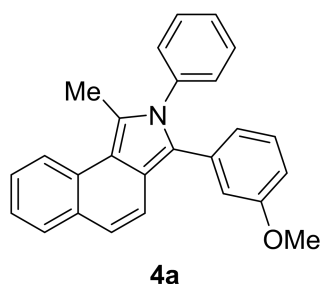

**3-(3-methoxyphenyl)-1-methyl-2-phenyl-2H-benzo[e]isoindole (4a).** Yellow oil (25.5 mg, 70% yield).  $^1\text{H}$  NMR (400 MHz,  $\text{CDCl}_3$ )  $\delta$  = 8.29 (d,  $J$  = 8.1 Hz, 1H), 7.73 (d,  $J$  = 7.8 Hz, 1H), 7.58 (d,  $J$  = 9.1 Hz, 1H), 7.51-7.46 (m, 1H), 7.43-7.35 (m, 4H), 7.24-7.20 (m, 3H), 7.15 (t,  $J$  = 7.6 Hz, 1H), 6.83 (d,  $J$  = 7.6 Hz, 1H), 6.72-6.70 (m, 2H), 3.61 (s, 3H), 2.73 (s, 3H).  $^{13}\text{C}$  NMR (100 MHz,  $\text{CDCl}_3$ )  $\delta$  = 159.3, 138.8, 133.6, 131.9, 129.7, 129.3, 129.1, 128.6, 128.2, 126.2, 124.1, 123.3, 122.6, 120.5, 120.0, 116.8, 115.0, 112.4, 55.2, 14.3. HRMS (APCI)  $m/z$  calcd for  $\text{C}_{26}\text{H}_{21}\text{NOH}^+$  ( $\text{M}+\text{H}$ ) $^+$  364.1696, found 364.1693.

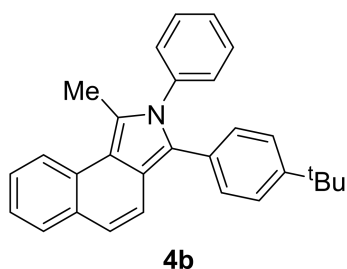

**3-(4-(tert-butyl)phenyl)-1-methyl-2-phenyl-2H-benzo[e]isoindole (4b).** Yellow oil (30.5 mg, 78% yield).  $^1\text{H}$  NMR (400 MHz,  $\text{CDCl}_3$ )  $\delta$  = 8.29 (d,  $J$  = 8.1 Hz, 1H), 7.72 (d,  $J$  = 7.8 Hz, 1H), 7.56 (d,  $J$  = 9.1 Hz, 1H), 7.50-7.46 (m, 1H), 7.41-7.34 (m, 4H), 7.25-7.19 (m, 5H), 7.14-7.10 (m, 2H), 2.71 (s, 3H), 1.28 (s, 9H).  $^{13}\text{C}$  NMR (100 MHz,

CDCl<sub>3</sub>)  $\delta$  = 149.0, 138.8, 132.0, 129.8, 129.6, 129.3, 129.0, 128.6, 128.1, 126.1, 125.1, 124.0, 123.7, 123.4, 122.8, 120.3, 34.6, 31.4, 14.3. HRMS (APCI)  $m/z$  calcd for C<sub>29</sub>H<sub>27</sub>NH<sup>+</sup> (M+H)<sup>+</sup> 390.2216, found 390.2219.

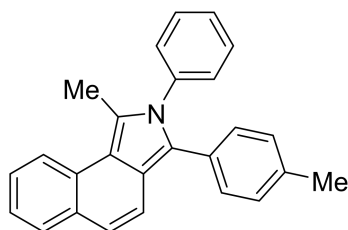

**4c**

**1-methyl-2-phenyl-3-(p-tolyl)-2H-benzo[e]isoindole (4c).** Yellow oil (25.7 mg, 73.9% yield). <sup>1</sup>H NMR (400 MHz, CDCl<sub>3</sub>)  $\delta$  = 8.29 (d,  $J$  = 8.0 Hz, 1H), 7.73-7.70 (m, 1H), 7.54-7.46 (m, 2H), 7.42-7.35 (m, 4H), 7.22-7.18 (m, 3H), 7.09 (d,  $J$  = 8.1 Hz, 2H), 7.03 (d,  $J$  = 8.2 Hz, 2H), 2.71 (s, 3H), 2.29 (s, 3H). <sup>13</sup>C NMR (100 MHz, CDCl<sub>3</sub>)  $\delta$  = 138.8, 135.9, 132.0, 130.0, 129.8, 129.5, 129.3, 129.0, 128.6, 128.1, 126.1, 124.1, 123.8, 123.3, 122.7, 120.3, 120.1, 116.7, 21.3, 14.3. HRMS (APCI)  $m/z$  calcd for C<sub>26</sub>H<sub>21</sub>NH<sup>+</sup> (M+H)<sup>+</sup> 348.1747, found 348.1744.

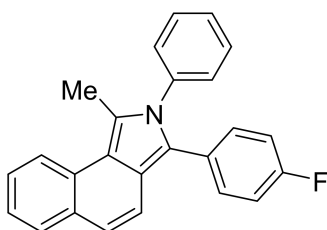

**4d**

**3-(4-fluorophenyl)-1-methyl-2-phenyl-2H-benzo[e]isoindole (4d).** Yellow oil (21.7 mg, 62% yield). <sup>1</sup>H NMR (400 MHz, CDCl<sub>3</sub>)  $\delta$  = 8.30 (d,  $J$  = 8.1 Hz, 1H), 7.73 (d,  $J$  = 7.8 Hz, 1H), 7.52-7.45 (m, 2H), 7.43-7.36 (m, 4H), 7.22-7.13 (m, 4H), 6.96-6.90 (m, 2H), 2.73 (s, 3H), 1.53 (s, 1H). <sup>13</sup>C NMR (100 MHz, CDCl<sub>3</sub>)  $\delta$  = 138.5, 131.9, 131.7, 131.7, 129.7, 129.3, 129.1, 128.7, 126.3, 124.2, 123.4, 123.0, 119.6, 116.7, 115.4, 115.2, 29.9, 14.3. <sup>19</sup>F NMR (376 MHz, CDCl<sub>3</sub>)  $\delta$  = -115.8. HRMS (APCI)  $m/z$  calcd for C<sub>25</sub>H<sub>18</sub>FNH<sup>+</sup> (M+H)<sup>+</sup> 352.1496, found 352.1496.

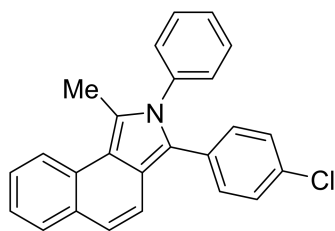

**4e**

**3-(4-chlorophenyl)-1-methyl-2-phenyl-2H-benzo[e]isoindole (4e).** Yellow oil (27.3 mg, 74% yield).  $^1\text{H}$  NMR (400 MHz,  $\text{CDCl}_3$ )  $\delta$  = 8.29 (d,  $J$  = 8.0 Hz, 1H), 7.74 (d,  $J$  = 7.8 Hz, 1H), 7.52-7.48 (m, 2H), 7.44-7.37 (m, 4H), 7.26-7.23 (m, 1H), 7.22-7.17 (m, 4H), 7.11 (d,  $J$  = 8.6 Hz, 2H), 2.72 (s, 3H).  $^{13}\text{C}$  NMR (100 MHz,  $\text{CDCl}_3$ )  $\delta$  = 132.1, 131.9, 131.1, 131.0, 129.6, 129.2, 128.7, 128.5, 128.4, 126.3, 124.5, 124.2, 123.3, 120.7, 119.5, 14.3. HRMS (APCI)  $m/z$  calcd for  $\text{C}_{25}\text{H}_{18}\text{ClNH}^+$  ( $\text{M}+\text{H}$ ) $^+$  368.1201, found 368.1200.

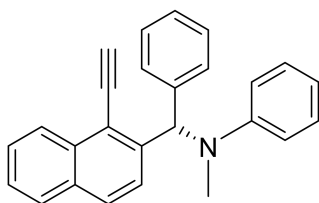

**5a**

**(S)-N-((1-ethynynaphthalen-2-yl)(phenyl)methyl)-N-methylaniline (5a).** Light yellow solid (30.9 mg, 89% yield). Mp:113.1-114.3 °C. HPLC: 93:7 er (Chiralpak ADH column, 254 nm, hexane/isopropanol = 98:2, flow rate 1.0 mL/min,  $t_r$  (major) = 7.31 min,  $t_r$  (minor) = 6.59 min.  $[\alpha]_{\text{D}}^{25}$  = 80.0 ( $c$  = 0.1,  $\text{CH}_2\text{Cl}_2$ ).  $^1\text{H}$  NMR (400 MHz,  $\text{CDCl}_3$ )  $\delta$  = 8.30 (d,  $J$  = 8.4 Hz, 1H), 7.71 (dd,  $J$  = 16.8, 8.1 Hz, 2H), 7.49 (t,  $J$  = 7.6 Hz, 1H), 7.41 (t,  $J$  = 7.4 Hz, 1H), 7.20 (m, 4H), 7.11 (m, 4H), 6.73 (d,  $J$  = 7.9 Hz, 2H), 6.63 (m, 2H), 3.43 (s, 1H), 2.75 (s, 3H).  $^{13}\text{C}$  NMR (100 MHz,  $\text{CDCl}_3$ )  $\delta$  = 150.5, 144.1, 140.9, 133.9, 132.4, 129.1, 128.8, 128.6, 128.3, 127.3, 126.6, 126.4, 125.8, 119.7, 117.0, 113.2, 88.7, 79.7, 65.9, 35.8. HRMS (APCI)  $m/z$  calcd for  $\text{C}_{26}\text{H}_{21}\text{NH}^+$  ( $\text{M}+\text{H}$ ) $^+$  348.1747, found 348.1742.

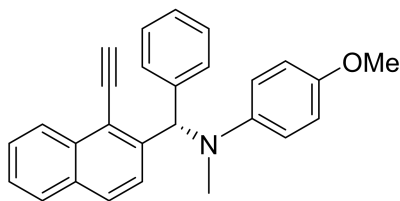

**5b**

**(S)-N-((1-ethynyl-2-phenylnaphthalen-2-yl)(phenyl)methyl)-4-methoxy-N-methylaniline**

**(5b).** Yellow oil (28.7 mg, 76% yield). HPLC: 82:18 er (Chiralpak ADH column, 254 nm, hexane/isopropanol = 98:2, flow rate 1.0 mL/min, tr (major) = 9.30 min, tr (minor) = 10.16 min.  $[\alpha]_{\text{D}}^{25} = 34.5$  (c = 0.1,  $\text{CH}_2\text{Cl}_2$ ).  $^1\text{H}$  NMR (400 MHz,  $\text{CDCl}_3$ )  $\delta = 8.29$  (d,  $J = 8.4$  Hz, 1H), 7.69 (dd,  $J = 15.4, 8.4$  Hz, 2H), 7.48 (t,  $J = 7.6$  Hz, 1H), 7.42-7.35 (m, 2H), 7.24-7.19 (m, 4H), 7.16-7.14 (m, 1H), 6.80-6.74 (m, 2H), 6.71-6.65 (m, 2H), 6.44 (s, 1H), 3.63 (s, 3H), 3.54 (s, 1H), 2.69 (s, 3H).  $^{13}\text{C}$  NMR (100 MHz,  $\text{CDCl}_3$ )  $\delta = 152.6, 145.5, 144.6, 141.7, 133.9, 132.3, 129.1, 128.6, 128.5, 128.2, 127.2, 126.4, 125.7, 117.0, 114.5, 88.5, 80.0, 67.2, 55.7$ . HRMS (APCI) m/z calcd for  $\text{C}_{27}\text{H}_{23}\text{NOH}^+$  (M+H) $^+$  378.1852, found 378.1850.

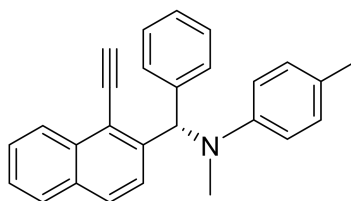

**5c**

**(S)-N-((1-ethynyl-2-phenylnaphthalen-2-yl)(phenyl)methyl)-N,4-dimethylaniline** (5c).

Yellow oil (33.3 mg, 92% yield). HPLC: 91:9 er (Chiralpak ADH column, 254 nm, hexane/isopropanol = 98:2, flow rate 1.0 mL/min, tr (major) = 6.58 min, tr (minor) = 7.26 min.  $[\alpha]_{\text{D}}^{25} = 50.8$  (c = 0.1,  $\text{CH}_2\text{Cl}_2$ ).  $^1\text{H}$  NMR (400 MHz,  $\text{CDCl}_3$ )  $\delta = 8.38$  (d,  $J = 8.4$  Hz, 1H), 7.77 (dd,  $J = 16.5, 8.3$  Hz, 2H), 7.56 (t,  $J = 7.6$  Hz, 1H), 7.51-7.46 (m, 1H), 7.34 (d,  $J = 8.6$  Hz, 1H), 7.31-7.18 (m, 5H), 6.99 (d,  $J = 8.4$  Hz, 2H), 6.74 (d,  $J = 8.3$  Hz, 2H), 6.65 (s, 1H), 3.55 (s, 1H), 2.81 (s, 3H), 2.21 (s, 3H).  $^{13}\text{C}$  NMR (100 MHz,  $\text{CDCl}_3$ )  $\delta = 148.5, 144.4, 141.2, 133.9, 132.3, 129.6, 129.1, 128.8, 128.5, 128.2, 127.3, 127.2, 126.5, 126.4, 126.4, 125.8, 119.5, 113.9, 88.6, 79.8, 66.2, 36.5, 20.4$ . HRMS (APCI) m/z calcd for  $\text{C}_{27}\text{H}_{23}\text{NH}^+$  (M+H) $^+$  362.1903, found 362.1907.

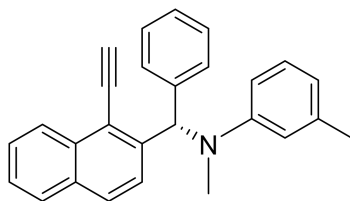

**5d**

**(S)-N-((1-ethynyl-naphthalen-2-yl)(phenyl)methyl)-N,3-dimethylaniline (5d).**

Yellow oil (20.7 mg, 57% yield). HPLC: 87:13 er (Chiralpak ODH column, 254 nm, hexane/isopropanol = 98:2, flow rate 1.0 mL/min, tr (major) = 5.69 min, tr (minor) = 4.95 min.  $[\alpha]_{\text{D}}^{25} = 73.1$  (c = 0.1,  $\text{CH}_2\text{Cl}_2$ ).  $^1\text{H}$  NMR (400 MHz,  $\text{CDCl}_3$ )  $\delta = 8.32$  (d,  $J = 8.2$  Hz, 1H), 7.73 (dd,  $J = 17.6, 8.3$  Hz, 2H), 7.50 (t,  $J = 7.0$  Hz, 1H), 7.43 (t,  $J = 7.9$  Hz, 1H), 7.26-7.17 (m, 4H), 7.10 (d,  $J = 7.0$  Hz, 2H), 6.99 (t,  $J = 7.7$  Hz, 1H), 6.66 (s, 1H), 6.61-6.52 (m, 2H), 6.47 (d,  $J = 7.2$  Hz, 1H), 3.45 (s, 1H), 2.76 (s, 3H), 2.20 (s, 3H).  $^{13}\text{C}$  NMR (100 MHz,  $\text{CDCl}_3$ )  $\delta = 150.4, 144.1, 140.9, 138.6, 133.9, 132.3, 129.0, 128.9, 128.7, 128.2, 127.2, 127.2, 126.5, 126.3, 125.7, 119.5, 113.8, 110.3, 35.8, 22.0$ . HRMS (APCI) m/z calcd for  $\text{C}_{27}\text{H}_{23}\text{NH}^+$  (M+H) $^+$  362.1903, found 362.1901.

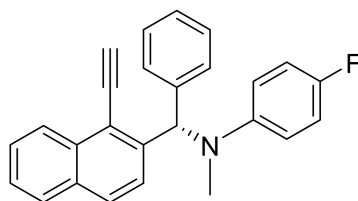

**5e**

**(S)-N-((1-ethynyl-naphthalen-2-yl)(phenyl)methyl)-4-fluoro-N-methylaniline (5e).**

Yellow solid (34.4 mg, 94% yield). Mp: 97.1-97.4 °C. HPLC: 88:12 er (Chiralpak ADH column, 254 nm, hexane/isopropanol = 98:2, flow rate 1.0 mL/min, tr (major) = 5.62 min, tr (minor) = 6.20 min.  $[\alpha]_{\text{D}}^{25} = 57.7$  (c = 0.1,  $\text{CH}_2\text{Cl}_2$ ).  $^1\text{H}$  NMR (400 MHz,  $\text{CDCl}_3$ )  $\delta = 8.29$  (d,  $J = 8.4$  Hz, 1H), 7.70 (dd,  $J = 17.3, 8.4$  Hz, 2H), 7.51-7.46 (m, 1H), 7.43-7.39 (m, 1H), 7.26-7.20 (m, 3H), 7.19-7.15 (m, 3H), 6.82-6.77 (m, 2H), 6.70-6.66 (m, 2H), 6.50 (s, 1H), 3.47 (s, 1H), 2.70 (s, 3H).  $^{13}\text{C}$  NMR (100 MHz,  $\text{CDCl}_3$ )  $\delta = 147.4, 144.0, 141.1, 133.9, 132.3, 129.1, 128.6, 128.6, 128.2, 127.4, 126.6, 126.4, 125.7, 115.5, 115.3, 115.2, 88.6, 79.9, 66.8, 37.1$ .  $^{19}\text{F}$  NMR (376 MHz,  $\text{CDCl}_3$ )  $\delta = -128.0$ . HRMS (APCI) m/z calcd for  $\text{C}_{26}\text{H}_{20}\text{FNH}^+$  (M+H) $^+$  366.1653, found

366.1650.

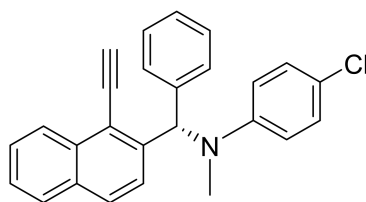

**5f**

**(S)-4-chloro-N-((1-ethynyl-naphthalen-2-yl)(phenyl)methyl)-N-methylaniline (5f).**

Yellow oil (31.7 mg, 83% yield). HPLC: 90:10 er (Chiralpak ODH column, 254 nm, hexane/isopropanol = 98:2, flow rate 1.0 mL/min, tr (major) = 5.78 min, tr (minor) = 5.47 min.  $[\alpha]_D^{25} = 100.5$  (c = 0.1, CH<sub>2</sub>Cl<sub>2</sub>). <sup>1</sup>H NMR (400 MHz, CDCl<sub>3</sub>)  $\delta = 8.38$  (d,  $J = 8.4$  Hz, 1H), 7.78 (dd,  $J = 19.0, 8.3$  Hz, 2H), 7.60-7.55 (m, 1H), 7.50 (t,  $J = 7.4$  Hz, 1H), 7.37-7.27 (m, 3H), 7.24-7.21 (m, 1H), 7.17 (d,  $J = 7.5$  Hz, 2H), 7.13-7.11 (m, 2H), 6.71 (d,  $J = 8.1$  Hz, 2H), 6.65 (s, 1H), 3.51 (s, 1H), 2.79 (s, 3H). <sup>13</sup>C NMR (100 MHz, CDCl<sub>3</sub>)  $\delta = 149.1, 143.6, 140.5, 133.9, 132.4, 129.1, 128.9, 128.7, 128.6, 128.3, 127.5, 126.7, 126.4, 125.7, 121.8, 119.9, 114.2, 88.8, 79.7, 66.0, 35.8$ . HRMS (APCI) m/z calcd for C<sub>26</sub>H<sub>20</sub>ClNH<sup>+</sup> (M+H)<sup>+</sup> 382.1357, found 382.1351.

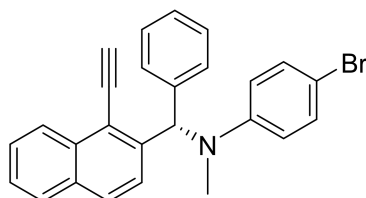

**5g**

**(S)-4-bromo-N-((1-ethynyl-naphthalen-2-yl)(phenyl)methyl)-N-methylaniline (5g).**

Yellow oil (31.7 mg, 74% yield). HPLC: 88:12 er (Chiralpak ODH column, 254 nm, hexane/isopropanol = 98:2, flow rate 0.7 mL/min, tr (major) = 8.74 min, tr (minor) = 8.18 min.  $[\alpha]_D^{25} = -24.6$  (c = 0.1, CH<sub>2</sub>Cl<sub>2</sub>). <sup>1</sup>H NMR (400 MHz, CDCl<sub>3</sub>)  $\delta = 8.30$  (d,  $J = 8.4$  Hz, 1H), 7.72 (dd,  $J = 20.1, 8.3$  Hz, 2H), 7.53-7.48 (m, 1H), 7.46-7.41 (m, 1H), 7.28-7.13 (m, 6H), 7.09 (d,  $J = 7.1$  Hz, 2H), 6.63-6.53 (m, 3H), 3.44 (s, 1H), 2.71 (s, 3H). <sup>13</sup>C NMR (100 MHz, CDCl<sub>3</sub>)  $\delta = 149.5, 143.5, 140.4, 133.9, 132.4, 131.8, 129.1, 128.7, 128.6, 128.3, 127.5, 127.5, 126.7, 126.4, 125.7, 114.6, 108.9, 88.8, 79.6, 65.9, 35.6$ . HRMS (APCI) m/z calcd for C<sub>26</sub>H<sub>20</sub>BrNH<sup>+</sup> (M+H)<sup>+</sup> 426.0852, found 426.0855.

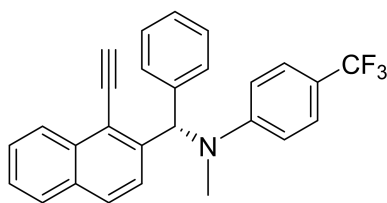

**5h**

**(S)-N-((1-ethynynaphthalen-2-yl)(phenyl)methyl)-N-methyl-4-(trifluoromethyl)aniline (5h).** Yellow oil (34.1 mg, 82% yield). HPLC: 82:18 er (Chiralpak ODH column, 254 nm, hexane/isopropanol = 98:2, flow rate 1.0 mL/min, tr (major) = 5.63 min, tr (minor) = 5.26 min.  $[\alpha]_D^{25} = -34.3$  (c = 0.1,  $\text{CH}_2\text{Cl}_2$ ).  $^1\text{H}$  NMR (400 MHz,  $\text{CDCl}_3$ )  $\delta = 8.31$  (d,  $J = 8.4$  Hz, 1H), 7.72 (dd,  $J = 18.1, 8.3$  Hz, 2H), 7.51 (t,  $J = 7.6$  Hz, 1H), 7.44 (t,  $J = 7.4$  Hz, 1H), 7.33 (d,  $J = 8.8$  Hz, 2H), 7.27-7.19 (m, 3H), 7.14-7.05 (m, 3H), 6.75-6.66 (m, 3H), 3.41 (s, 1H), 2.77 (s, 3H).  $^{13}\text{C}$  NMR (100 MHz,  $\text{CDCl}_3$ )  $\delta = 152.4, 143.0, 139.9, 133.9, 132.5, 129.2, 128.9, 128.6, 128.3, 127.6, 126.9, 126.4, 125.7, 120.2, 111.8, 88.9, 79.5, 65.6, 35.2$ .  $^{19}\text{F}$  NMR (376 MHz,  $\text{CDCl}_3$ )  $\delta = -60.8$ . HRMS (APCI) m/z calcd for  $\text{C}_{27}\text{H}_{20}\text{F}_3\text{NH}^+$  (M+H) $^+$  416.1621, found 416.1624.

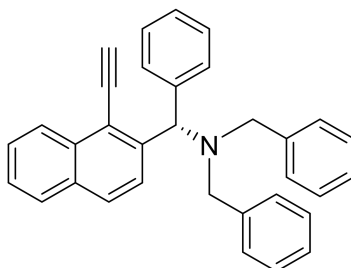

**5i**

**(S)-N,N-dibenzyl-1-(1-ethynynaphthalen-2-yl)-1-phenylmethanamine (5i).** Yellow oil (26.7 mg, 61% yield). HPLC: 74:26 er (Chiralpak ADH column, 254 nm, hexane/isopropanol = 98:2, flow rate 1.0 mL/min, tr (major) = 6.66 min, tr (minor) = 5.89 min.  $[\alpha]_D^{25} = 29.7$  (c = 0.1,  $\text{CH}_2\text{Cl}_2$ ).  $^1\text{H}$  NMR (400 MHz,  $\text{CDCl}_3$ )  $\delta = 8.29$  (d,  $J = 8.4$  Hz, 1H), 7.90 (d,  $J = 8.7$  Hz, 1H), 7.72-7.66 (m, 2H), 7.61 (d,  $J = 7.7$  Hz, 2H), 7.48-7.43 (m, 1H), 7.40-7.35 (m, 1H), 7.26-7.12 (m, 12H), 7.09-7.05 (m, 1H), 5.75 (s, 1H), 3.72-3.60 (m, 4H), 3.54 (s, 1H).  $^{13}\text{C}$  NMR (100 MHz,  $\text{CDCl}_3$ )  $\delta = 144.3, 142.9, 138.6, 133.9, 132.2, 129.3, 129.2, 128.6, 128.3, 128.2, 128.1, 127.2, 127.1, 126.8, 126.5, 126.4, 125.6, 118.9, 88.2, 80.2, 67.3, 53.4$ . HRMS (APCI) m/z calcd for

$C_{33}H_{27}NH^+$  ( $M+H$ ) $^+$  438.2216, found 438.2214.

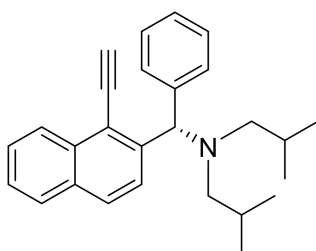

**5j**

**(S)-N-((1-ethynyl-naphthalen-2-yl)(phenyl)methyl)-N-isobutyl-2-methylpropan-1-amine (5j).** Yellow oil (30.7 mg, 83% yield). HPLC: 90:10 er (Chiralpak IA column, 254 nm, hexane/isopropanol = 98:2, flow rate 0.5 mL/min, tr (major) = 6.75 min, tr (minor) = 7.08 min.  $[\alpha]_D^{25} = 47.7$  (c = 0.1,  $CH_2Cl_2$ ).  $^1H$  NMR (400 MHz,  $CDCl_3$ )  $\delta$  = 8.39 (d,  $J$  = 8.3 Hz, 1H), 7.79 (dd,  $J$  = 8.2, 5.7 Hz, 2H), 7.71 (d,  $J$  = 8.7 Hz, 1H), 7.57-7.53 (m, 1H), 7.48 (t,  $J$  = 7.5 Hz, 3H), 7.23 (d,  $J$  = 9.0 Hz, 2H), 7.16 (t,  $J$  = 7.2 Hz, 1H), 5.79 (s, 1H), 3.73 (s, 1H), 2.31 (qd,  $J$  = 13.0, 7.1 Hz, 4H), 1.79 (dq,  $J$  = 14.0, 6.6 Hz, 2H), 0.91 (d,  $J$  = 6.6 Hz, 6H), 0.81 (d,  $J$  = 6.6 Hz, 6H).  $^{13}C$  NMR (100 MHz,  $CDCl_3$ )  $\delta$  = 143.1, 132.0, 129.0, 128.2, 128.0, 127.9, 126.9, 126.8, 126.7, 126.5, 126.2, 87.2, 80.4, 69.1, 60.8, 26.9, 21.3. HRMS (APCI) m/z calcd for  $C_{27}H_{31}NH^+$  ( $M+H$ ) $^+$  370.2529, found 370.2526.

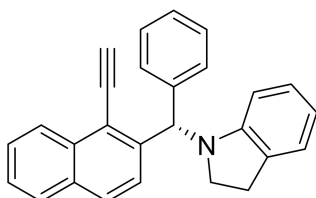

**5k**

**(S)-1-((1-ethynyl-naphthalen-2-yl)(phenyl)methyl)indoline (5k).** Yellow oil (25.3 mg, 70% yield). HPLC: 85:15 er (Chiralpak ODH column, 254 nm, hexane/isopropanol = 98:2, flow rate 1.0 mL/min, tr (major) = 6.00 min, tr (minor) = 7.29 min.  $[\alpha]_D^{25} = 62.8$  (c = 0.1,  $CH_2Cl_2$ ).  $^1H$  NMR (400 MHz,  $CDCl_3$ )  $\delta$  = 8.31 (d,  $J$  = 8.2 Hz, 1H), 7.71 (d,  $J$  = 8.3 Hz, 2H), 7.64 (d,  $J$  = 8.6 Hz, 1H), 7.48 (t,  $J$  = 7.5 Hz, 1H), 7.43-7.36 (m, 3H), 7.21 (t,  $J$  = 7.2 Hz, 2H), 7.17-7.11 (m, 1H), 7.00 (d,  $J$  = 7.0 Hz, 1H), 6.77 (t,  $J$  = 7.5 Hz, 1H), 6.56 (t,  $J$  = 7.1 Hz, 1H), 6.12 (s, 1H), 6.01 (d,  $J$  =

7.7 Hz, 1H), 3.66 (s, 1H), 3.13 (t,  $J = 8.3$  Hz, 2H), 2.86 (t,  $J = 7.9$  Hz, 2H).  $^{13}\text{C}$  NMR (100 MHz,  $\text{CDCl}_3$ )  $\delta = 151.9, 140.7, 133.3, 131.7, 128.0, 128.0, 127.7, 126.8, 126.7, 126.6, 126.0, 125.9, 125.1, 123.7, 117.6, 108.7, 65.3, 52.6, 28.0$ . HRMS (APCI)  $m/z$  calcd for  $\text{C}_{27}\text{H}_{21}\text{NH}^+$  ( $\text{M}+\text{H}$ ) $^+$  360.1747, found 360.1742.

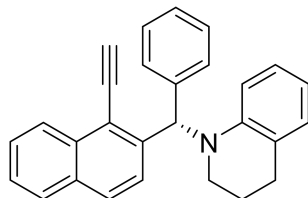

5l

**(S)-1-((1-ethynyl-naphthalen-2-yl)(phenyl)methyl)-1,2,3,4-tetrahydroquinoline**

**(5l).** Yellow oil (32.8 mg, 88% yield). HPLC: 90:10 er (Chiralpak OJH column, 254 nm, hexane/isopropanol = 98:2, flow rate 1.0 mL/min,  $t_r$  (major) = 10.28 min,  $t_r$  (minor) = 8.71 min.  $[\alpha]_{\text{D}}^{25} = 68.7$  ( $c = 0.1, \text{CH}_2\text{Cl}_2$ ).  $^1\text{H}$  NMR (400 MHz,  $\text{CDCl}_3$ )  $\delta = 8.32$  (d,  $J = 8.4$  Hz, 1H), 7.72 (dd,  $J = 21.0, 8.0$  Hz, 2H), 7.52-7.47 (m, 1H), 7.45-7.40 (m, 1H), 7.23-7.19 (m, 3H), 7.10 (d,  $J = 7.1$  Hz, 2H), 6.92-6.82 (m, 2H), 6.61 (s, 1H), 6.48 (t,  $J = 8.6$  Hz, 2H), 3.46 (s, 1H), 3.07-2.96 (m, 2H), 2.70 (t,  $J = 6.2$  Hz, 2H), 1.82 (p,  $J = 6.0$  Hz, 2H).  $^{13}\text{C}$  NMR (100 MHz,  $\text{CDCl}_3$ )  $\delta = 145.9, 144.0, 140.4, 134.0, 132.4, 129.1, 128.9, 128.5, 128.3, 127.3, 127.2, 126.6, 126.4, 126.0, 122.8, 119.9, 115.8, 111.5, 88.9, 79.6, 65.0, 46.4, 28.7, 22.7$ . HRMS (APCI)  $m/z$  calcd for  $\text{C}_{28}\text{H}_{22}\text{BrNH}^+$  ( $\text{M}+\text{H}$ ) $^+$  374.1903, found 374.1901.

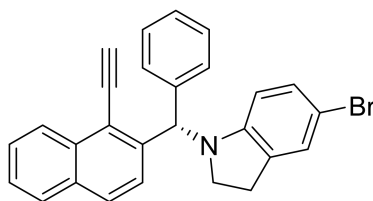

5m

**(S)-5-bromo-1-((1-ethynyl-naphthalen-2-yl)(phenyl)methyl)indoline (5m).**

Yellow oil (35.5 mg, 81% yield). HPLC: 85:15 er (Chiralpak ODH column, 254 nm, hexane/isopropanol = 98:2, flow rate 1.0 mL/min,  $t_r$  (major) = 6.99 min,  $t_r$  (minor) = 7.76 min.  $[\alpha]_{\text{D}}^{25} = -34.3$  ( $c = 0.1, \text{CH}_2\text{Cl}_2$ ).  $^1\text{H}$  NMR (400 MHz,  $\text{CDCl}_3$ )  $\delta = 8.31$  (d,  $J = 8.3$  Hz, 1H), 7.71 (dd,  $J = 8.2, 3.4$  Hz, 2H), 7.56-7.47 (m, 2H), 7.42 (t,  $J = 7.4$  Hz,

1H), 7.34 (d,  $J = 7.5$  Hz, 2H), 7.24-7.14 (m, 3H), 7.06-7.06 (m, 1H), 6.85 (d,  $J = 8.3$  Hz, 1H), 6.10 (s, 1H), 5.86 (d,  $J = 8.3$  Hz, 1H), 3.66 (s, 1H), 3.13 (t,  $J = 8.1$  Hz, 2H), 2.83 (t,  $J = 8.1$  Hz, 2H).  $^{13}\text{C}$  NMR (100 MHz,  $\text{CDCl}_3$ )  $\delta = 150.9, 142.7, 140.2, 133.3, 132.6, 131.8, 129.2, 128.9, 128.1, 127.9, 127.7, 127.0, 126.9, 126.7, 126.2, 126.0, 125.0, 118.1, 109.6, 109.2, 88.4, 79.4, 65.0, 52.4, 27.8$ . HRMS (APCI)  $m/z$  calcd for  $\text{C}_{27}\text{H}_{20}\text{BrNH}^+$  ( $\text{M}+\text{H}$ ) $^+$  438.0852, found 438.0849.

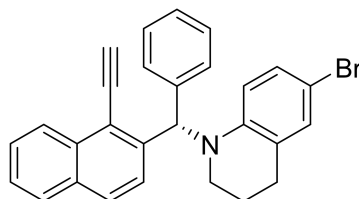

**5n**

**(S)-6-bromo-1-((1-ethynyl)naphthalen-2-yl)(phenyl)methyl-1,2,3,4**

**tetrahydroquinoline (5n).** Yellow oil (41.2 mg, 91% yield). HPLC: 84:16 er (Chiralpak ODH column, 254 nm, hexane/isopropanol = 98:2, flow rate 1.0 mL/min,  $t_r$  (major) = 5.57 min,  $t_r$  (minor) = 5.20 min.  $[\alpha]_{\text{D}}^{25} = 27.8$  ( $c = 0.1, \text{CH}_2\text{Cl}_2$ ).  $^1\text{H}$  NMR (400 MHz,  $\text{CDCl}_3$ )  $\delta = 8.32$  (d,  $J = 8.0$  Hz, 1H), 7.72 (dd,  $J = 25.0, 8.1$  Hz, 2H), 7.53-7.42 (m, 2H), 7.28-7.20 (m, 3H), 7.14-7.09 (m, 3H), 7.01-6.89 (m, 2H), 6.54 (s, 1H), 6.33 (d,  $J = 8.2$  Hz, 1H), 3.46 (s, 1H), 3.07-2.89 (m, 2H), 2.66 (s, 2H), 1.84-1.75 (m, 2H).  $^{13}\text{C}$  NMR (100 MHz,  $\text{CDCl}_3$ )  $\delta = 144.10, 142.52, 139.11, 133.12, 131.61, 130.43, 128.93, 128.14, 128.02, 127.91, 127.49, 126.66, 125.96, 125.58, 125.26, 124.06, 119.39, 106.72, 64.24, 45.37, 27.66, 21.57$ . HRMS (APCI)  $m/z$  calcd for  $\text{C}_{28}\text{H}_{22}\text{BrNH}^+$  ( $\text{M}+\text{H}$ ) $^+$  452.1008, found 452.1004.

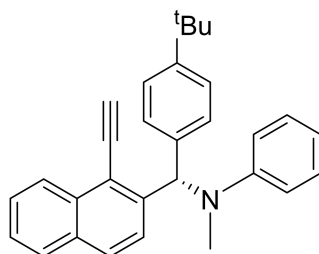

**6a**

**(S)-N-((4-(tert-butyl)phenyl)(1-ethynyl)naphthalen-2-yl)methyl-N-methylaniline**

**(6a).** Yellow oil (38.7 mg, 96% yield). HPLC: 78:22 er (Chiralpak OJH column, 254

nm, hexane/isopropanol = 98:2, flow rate 0.5 mL/min, tr (major) = 11.24 min, tr (minor) = 9.69 min.  $[\alpha]_{\text{D}}^{25} = 74.2$  (c = 0.1,  $\text{CH}_2\text{Cl}_2$ ).  $^1\text{H NMR}$  (400 MHz,  $\text{CDCl}_3$ )  $\delta = 8.38$  (d,  $J = 8.4$  Hz, 1H), 7.77 (dd,  $J = 17.7, 8.4$  Hz, 2H), 7.58-7.53 (m, 1H), 7.48 (t,  $J = 7.5$  Hz, 1H), 7.33-7.29 (m, 3H), 7.21-7.16 (m, 2H), 7.11-7.06 (m, 2H), 6.86-6.80 (m, 2H), 6.73-6.67 (m, 2H), 3.50 (s, 1H), 2.83 (s, 3H), 1.30 (s, 9H).  $^{13}\text{C NMR}$  (100 MHz,  $\text{CDCl}_3$ )  $\delta = 150.5, 150.1, 144.4, 137.6, 133.9, 132.3, 129.1, 129.0, 128.4, 128.2, 127.3, 126.5, 126.4, 125.9, 125.4, 119.6, 116.9, 113.1, 88.6, 79.8, 65.4, 35.7, 34.6, 31.5$ . HRMS (APCI) m/z calcd for  $\text{C}_{30}\text{H}_{29}\text{NH}^+$  (M+H) $^+$  404.2373, found 404.2374.

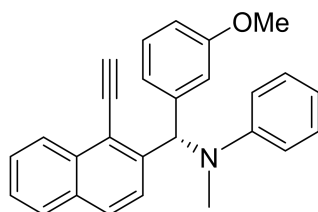

**6b**

**(S)-N-((1-ethynyl-2-naphthyl)(3-methoxyphenyl)methyl)-N-methylaniline**

**(6b)**. Yellow oil (27.6 mg, 73% yield). HPLC: 85:15 er (Chiralpak ODH column, 254 nm, hexane/isopropanol = 98:2, flow rate 1.0 mL/min, tr (major) = 6.19 min, tr (minor) = 7.39 min.  $[\alpha]_{\text{D}}^{25} = 43.3$  (c = 0.1,  $\text{CH}_2\text{Cl}_2$ ).  $^1\text{H NMR}$  (400 MHz,  $\text{CDCl}_3$ )  $\delta = 8.38$  (d,  $J = 8.4$  Hz, 1H), 7.78 (dd,  $J = 18.9, 8.3$  Hz, 2H), 7.57 (t,  $J = 7.6$  Hz, 1H), 7.49 (t,  $J = 7.5$  Hz, 1H), 7.29 (dd,  $J = 8.6, 2.5$  Hz, 1H), 7.24-7.16 (m, 3H), 6.83-6.75 (m, 5H), 6.72-6.68 (m, 2H), 3.73 (s, 3H), 3.51 (s, 1H), 2.84 (d,  $J = 2.5$  Hz, 3H).  $^{13}\text{C NMR}$  (100 MHz,  $\text{CDCl}_3$ )  $\delta = 159.9, 150.5, 144.0, 142.7, 132.4, 129.6, 129.1, 129.0, 128.2, 127.3, 126.6, 126.4, 125.8, 121.2, 119.8, 117.0, 114.6, 113.2, 112.5, 88.7, 79.7, 65.9, 55.3, 35.8$ . HRMS (APCI) m/z calcd for  $\text{C}_{27}\text{H}_{23}\text{NOH}^+$  (M+H) $^+$  378.1852, found 378.1848.

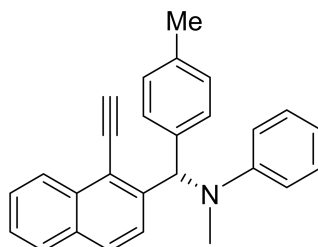

**6c**

**(S)-N-((1-ethynyl-2-naphthyl)(p-tolyl)methyl)-N-methylaniline (6c)**. Yellow

oil (29.6 mg, 82% yield). HPLC: 78:22 er (Chiralpak ADH column, 254 nm, hexane/isopropanol = 98:2, flow rate 0.7 mL/min, tr (major) = 9.88 min, tr (minor) = 12.64 min.  $[\alpha]_{\text{D}}^{25} = 16.2$  ( $c = 0.1$ ,  $\text{CH}_2\text{Cl}_2$ ).  $^1\text{H}$  NMR (400 MHz,  $\text{CDCl}_3$ )  $\delta = 8.38$  (d,  $J = 8.3$  Hz, 1H), 7.79 (dd,  $J = 18.1, 8.3$  Hz, 2H), 7.59-7.55 (m, 1H), 7.52-7.48 (m, 1H), 7.34-7.30 (m, 1H), 7.20-7.16 (m, 2H), 7.11 (d,  $J = 8.2$  Hz, 2H), 7.05 (d,  $J = 8.1$  Hz, 2H), 6.80 (d,  $J = 8.2$  Hz, 2H), 6.72-6.67 (m, 2H), 3.53 (s, 1H), 2.84 (s, 3H), 2.33 (s, 3H).  $^{13}\text{C}$  NMR (100 MHz,  $\text{CDCl}_3$ )  $\delta = 144.4, 137.8, 136.9, 129.3, 129.1, 129.0, 128.8, 127.3, 126.5, 126.4, 125.7, 116.9, 113.1, 88.7, 79.7, 65.6, 35.7, 21.3$ . HRMS (APCI)  $m/z$  calcd for  $\text{C}_{27}\text{H}_{23}\text{NH}^+$  ( $\text{M}+\text{H}$ ) $^+$  362.1903, found 362.1898.

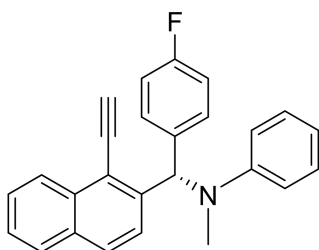

**6d**

**(S)-N-((1-ethynynaphthalen-2-yl)(4-fluorophenyl)methyl)-N-methylaniline (6d).**

Yellow oil (35.1 mg, 96% yield). HPLC: 92:8 er (Chiralpak ADH column, 254 nm, hexane/isopropanol = 98:2, flow rate 0.7 mL/min, tr (major) = 10.42 min, tr (minor) = 11.35 min.  $[\alpha]_{\text{D}}^{25} = 30.8$  ( $c = 0.1$ ,  $\text{CH}_2\text{Cl}_2$ ).  $^1\text{H}$  NMR (400 MHz,  $\text{CDCl}_3$ )  $\delta = 8.39$  (d,  $J = 8.2$  Hz, 1H), 7.80 (dd,  $J = 14.6, 8.1$  Hz, 2H), 7.58 (t,  $J = 7.6$  Hz, 1H), 7.51 (t,  $J = 7.4$  Hz, 1H), 7.30 (d,  $J = 8.6$  Hz, 1H), 7.21-7.13 (m, 4H), 7.00 (t,  $J = 8.2$  Hz, 2H), 6.82-6.78 (m, 2H), 6.72 (t,  $J = 7.2$  Hz, 1H), 6.68 (s, 1H), 3.87-3.24 (m, 1H), 2.84-2.81 (m, 3H).  $^{13}\text{C}$  NMR (100 MHz,  $\text{CDCl}_3$ )  $\delta = 143.9, 136.7, 134.0, 132.4, 130.3, 129.2, 129.2, 128.3, 127.4, 126.7, 126.4, 119.6, 117.3, 115.6, 115.4, 113.4, 88.9, 79.6, 65.4, 35.8$ .  $^{19}\text{F}$  NMR (376 MHz,  $\text{CDCl}_3$ )  $\delta = -115.4$ . HRMS (APCI)  $m/z$  calcd for  $\text{C}_{26}\text{H}_{20}\text{FNH}^+$  ( $\text{M}+\text{H}$ ) $^+$  366.1653, found 366.1650.

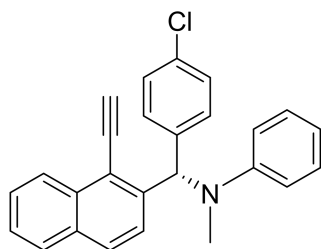

**6e**

**(S)-N-((4-chlorophenyl)(1-ethynynaphthalen-2-yl)methyl)-N-methylaniline (6e).**

Yellow oil (34.9 mg, 84% yield). HPLC: 92:8 er (Chiralpak ADH column, 254 nm, hexane/isopropanol = 98:2, flow rate 1.0 mL/min, tr (major) = 8.24 min, tr (minor) = 9.54 min.  $[\alpha]_D^{25} = 42.3$  (c = 0.1, CH<sub>2</sub>Cl<sub>2</sub>). <sup>1</sup>H NMR (400 MHz, CDCl<sub>3</sub>) δ = 8.38 (d, *J* = 8.4 Hz, 1H), 7.80 (dd, *J* = 15.6, 8.4 Hz, 2H), 7.60-7.55 (m, 1H), 7.51 (t, *J* = 7.5 Hz, 1H), 7.31-7.24 (m, 3H), 7.22-7.16 (m, 2H), 7.12 (d, *J* = 7.1 Hz, 2H), 6.81-6.78 (m, 2H), 6.75-6.70 (m, 1H), 6.67-6.66 (m, 1H), 3.52 (s, 1H), 2.85-2.76 (m, 3H). <sup>13</sup>C NMR (100 MHz, CDCl<sub>3</sub>) δ = 150.3, 143.5, 139.6, 133.1, 130.1, 129.2, 129.2, 128.8, 128.3, 127.5, 126.7, 126.4, 125.5, 119.7, 117.4, 113.4, 88.9, 79.6, 65.5, 35.9. HRMS (APCI) m/z calcd for C<sub>26</sub>H<sub>20</sub>ClNH<sup>+</sup> (M+H)<sup>+</sup> 382.1357, found 382.1355.

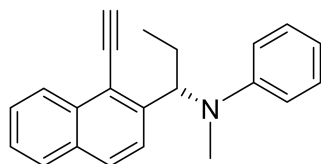

**6f**

**(S)-N-(1-(1-ethynynaphthalen-2-yl)propyl)-N-methylaniline (6f).**

Yellow oil (26.0 mg, 87% yield). HPLC: 94:6 er (Chiralpak OJH column, 254 nm, hexane/isopropanol = 98:2, flow rate 0.7 mL/min, tr (major) = 11.69 min, tr (minor) = 12.53 min.  $[\alpha]_D^{25} = -53.4$  (c = 0.1, CH<sub>2</sub>Cl<sub>2</sub>). <sup>1</sup>H NMR (400 MHz, CDCl<sub>3</sub>) δ = 8.40 (d, *J* = 8.4 Hz, 1H), 7.76 (t, *J* = 9.1 Hz, 2H), 7.58-7.53 (m, 1H), 7.46 (t, *J* = 7.4 Hz, 1H), 7.38 (d, *J* = 8.6 Hz, 1H), 7.17 (t, *J* = 7.6 Hz, 2H), 6.84 (d, *J* = 8.3 Hz, 2H), 6.67 (t, *J* = 7.2 Hz, 1H), 5.39-5.33 (m, 1H), 3.75 (s, 1H), 3.08 (s, 3H), 2.17-2.01 (m, 2H), 1.02 (t, *J* = 7.3 Hz, 3H). <sup>13</sup>C NMR (100 MHz, CDCl<sub>3</sub>) δ = 150.4, 146.1, 134.0, 132.1, 129.3, 129.1, 128.2, 127.2, 126.2, 123.7, 116.7, 113.2, 88.2, 80.0, 62.7, 33.2, 29.2, 27.1, 12.3, 9.9. HRMS

(APCI)  $m/z$  calcd for  $C_{22}H_{21}NH^+$  ( $M+H$ )<sup>+</sup> 300.1347, found 300.1344.

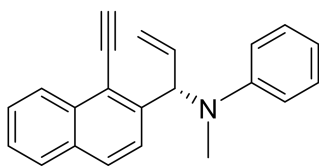

**6g**

**(S)-N-(1-(1-ethynyl-2-allylnaphthalen-2-yl)allyl)-N-methylaniline (6g).** Yellow oil (26.7 mg, 90% yield). HPLC: 86:14 er (Chiralpak ADH column, 254 nm, hexane/isopropanol = 98:2, flow rate 1.0 mL/min, tr (major) = 5.49 min, tr (minor) = 5.05 min.  $[\alpha]_D^{25} = 27.3$  ( $c = 0.1$ ,  $CH_2Cl_2$ ).  $^1H$  NMR (400 MHz,  $CDCl_3$ )  $\delta = 8.35$  (d,  $J = 8.4$  Hz, 1H), 7.77-7.72 (m, 2H), 7.62 (d,  $J = 8.8$  Hz, 1H), 7.56-7.52 (m, 1H), 7.48-7.43 (m, 1H), 7.35-7.30 (m, 1H), 7.28-7.23 (m, 2H), 6.82 (d,  $J = 8.1$  Hz, 2H), 6.73 (t,  $J = 7.3$  Hz, 1H), 6.45-6.38 (m, 1H), 4.18 (dd,  $J = 5.7, 1.3$  Hz, 2H), 3.71 (s, 1H), 3.01 (s, 3H).  $^{13}C$  NMR (100 MHz,  $CDCl_3$ )  $\delta = 149.6, 137.9, 134.0, 132.4, 130.3, 129.3, 129.0, 128.2, 127.4, 126.6, 126.4, 122.6, 117.5, 116.8, 112.9, 87.7, 80.0, 55.2, 38.2$ . HRMS (APCI)  $m/z$  calcd for  $C_{22}H_{19}NH^+$  ( $M+H$ )<sup>+</sup> 298.1590, found 298.1593.

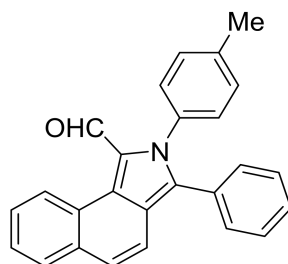

**7a**

**3-phenyl-2-(p-tolyl)-2H-benzo[e]isoindole-1-carbaldehyde (7a).** Yellow oil (27.1 mg, 75% yield).  $^1H$  NMR (400 MHz,  $CDCl_3$ )  $\delta = 9.90$  (d,  $J = 8.1$  Hz, 1H), 9.71 (s, 1H), 7.77 (dd,  $J = 7.8, 1.2$  Hz, 1H), 7.61-7.51 (m, 2H), 7.46 (d,  $J = 3.4$  Hz, 2H), 7.27-7.22 (m, 4H), 7.18 (s, 1H), 7.13 (s, 4H), 2.32 (s, 3H).  $^{13}C$  NMR (100 MHz,  $CDCl_3$ )  $\delta = 179.5, 139.4, 136.5, 134.6, 133.7, 130.0, 129.8, 129.0, 128.7, 128.6, 128.4, 127.7, 127.4, 126.7, 126.4, 123.0, 118.8, 21.4$ . HRMS (APCI)  $m/z$  calcd for  $C_{26}H_{19}NOH^+$  ( $M+H$ )<sup>+</sup> 362.1539, found 362.1537.

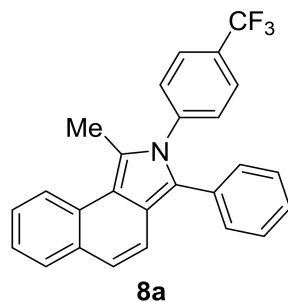

**1-methyl-3-phenyl-2-(4-(trifluoromethyl)phenyl)-2H-benzo[e]isoindole (8a).**

Yellow solid (33.7 mg, 84% yield). Mp: 121.2-121.6 °C. <sup>1</sup>H NMR (400 MHz, CDCl<sub>3</sub>) δ = 8.29 (d, *J* = 8.01 Hz, 1H), 7.75-7.72 (m, 1H), 7.67 (d, *J* = 8.25 Hz, 2H), 7.53-7.48 (m, 2H), 7.42-7.38 (m, 1H), 7.33 (d, *J* = 8.16 Hz, 2H), 7.28-7.24 (m, 3H), 7.23-7.20 (m, 1H), 7.18-7.15 (m, 2H), 2.74 (s, 3H). <sup>13</sup>C NMR (100 MHz, CDCl<sub>3</sub>) δ 141.9, 132.0, 131.9, 130.1, 129.7, 128.5, 126.6, 126.4, 126.3, 126.2, 125.0, 124.6, 124.4, 123.4, 122.8, 120.9, 119.7, 117.4, 14.4. <sup>19</sup>F NMR (376 MHz, CDCl<sub>3</sub>) δ = -62.5. HRMS (APCI) *m/z* calcd for C<sub>26</sub>H<sub>18</sub>F<sub>3</sub>NH<sup>+</sup> (M+H)<sup>+</sup> 402.1464, found 402.1465.

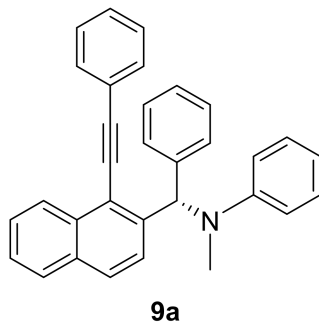

**(S)-N-methyl-N-(phenyl(1-(phenylethynyl)naphthalen-2-yl)methyl)aniline (9a).**

Yellow oil (35.2 mg, 83% yield). HPLC: 90:10 er (Chiralpak ADH column, 254 nm, hexane/isopropanol = 98:2, flow rate 1.0 mL/min, *t<sub>r</sub>* (major) = 8.21 min, *t<sub>r</sub>* (minor) = 6.13 min. [α]<sub>D</sub><sup>25</sup> = 22.3 (c = 0.1, CH<sub>2</sub>Cl<sub>2</sub>). <sup>1</sup>H NMR (400 MHz, CDCl<sub>3</sub>) δ 8.41 (d, *J* = 8.4 Hz, 1H), 7.75 (d, *J* = 8.1 Hz, 1H), 7.66 (d, *J* = 8.6 Hz, 1H), 7.55-7.50 (m, 1H), 7.46-7.42 (m, 1H), 7.29-7.24 (m, 2H), 7.22-7.08 (m, 9H), 6.96 (d, *J* = 7.9 Hz, 2H), 6.74 (d, *J* = 8.1 Hz, 2H), 6.68-6.62 (m, 2H), 2.77 (s, 3H). <sup>13</sup>C NMR (100 MHz, CDCl<sub>3</sub>) δ = 150.5, 142.6, 141.1, 133.6, 132.5, 131.7, 129.3, 128.7, 128.6, 128.5, 128.3, 128.3, 127.3, 127.2, 126.6, 126.5, 126.4, 121.3, 116.7, 101.1, 66.2, 35.3. HRMS (APCI) *m/z* calcd for C<sub>32</sub>H<sub>25</sub>NH<sup>+</sup> (M+H)<sup>+</sup> 424.2060, found 424.2059.

## IV References

- [1] Sun, R.; Jiang, Y.; Tang, X. Y.; et al. Rh<sup>II</sup>-Catalyzed Cyclization of Ester/Thioester-Containing N-Sulfonyl-1, 2, 3-triazoles: Facile Synthesis of Alkylidenephthalans and Alkylidenethiophthalans. *Asian Journal of Organic Chemistry*, **2017**, 6, 83–87.
- [2] Liao, M. Y.; Li J. X.; Zhu, H. H.; et al. Synthesis of Axially Chiral N-Arylpyrroles through the Enantioselective Annulation of Yne-Allylic Esters with a Cooperative Copper-Squaramide Catalysis. *Organic Letters*, **2025**, 27(19), 4836–4841.

# V NMR Spectrum

## <sup>1</sup>H NMR-3a (400 MHz, CDCl<sub>3</sub>)

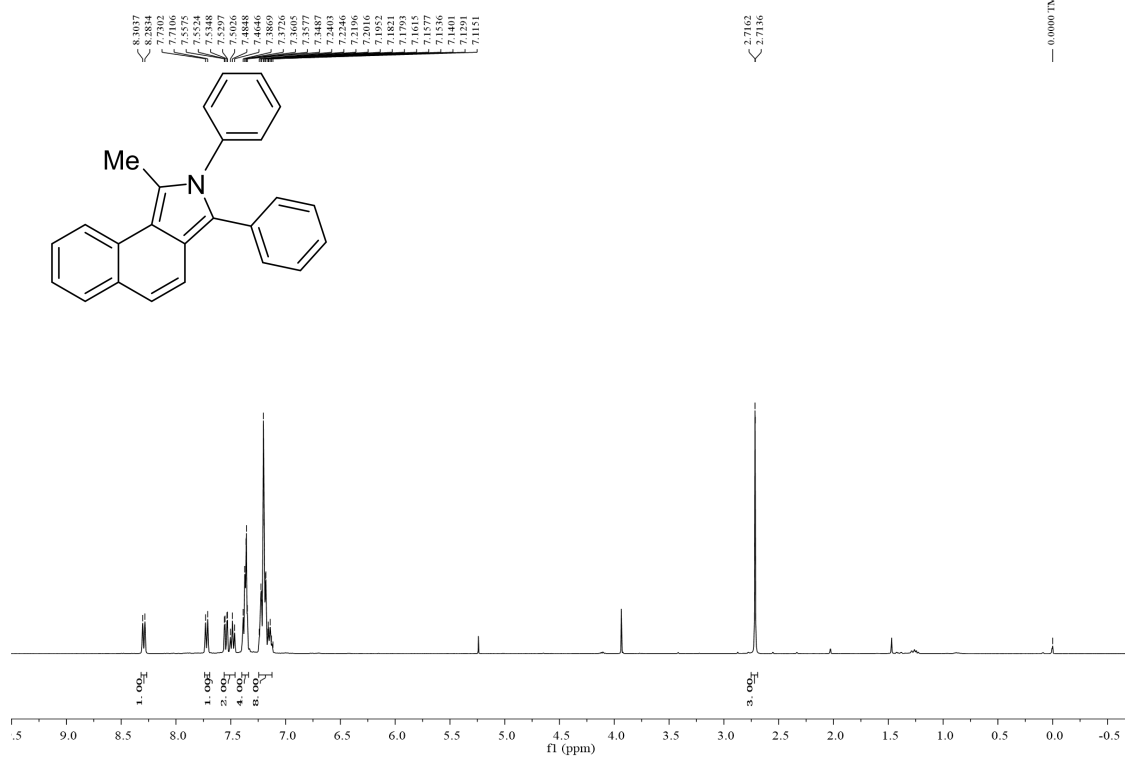

## <sup>13</sup>C NMR-3a (100 MHz, CDCl<sub>3</sub>)

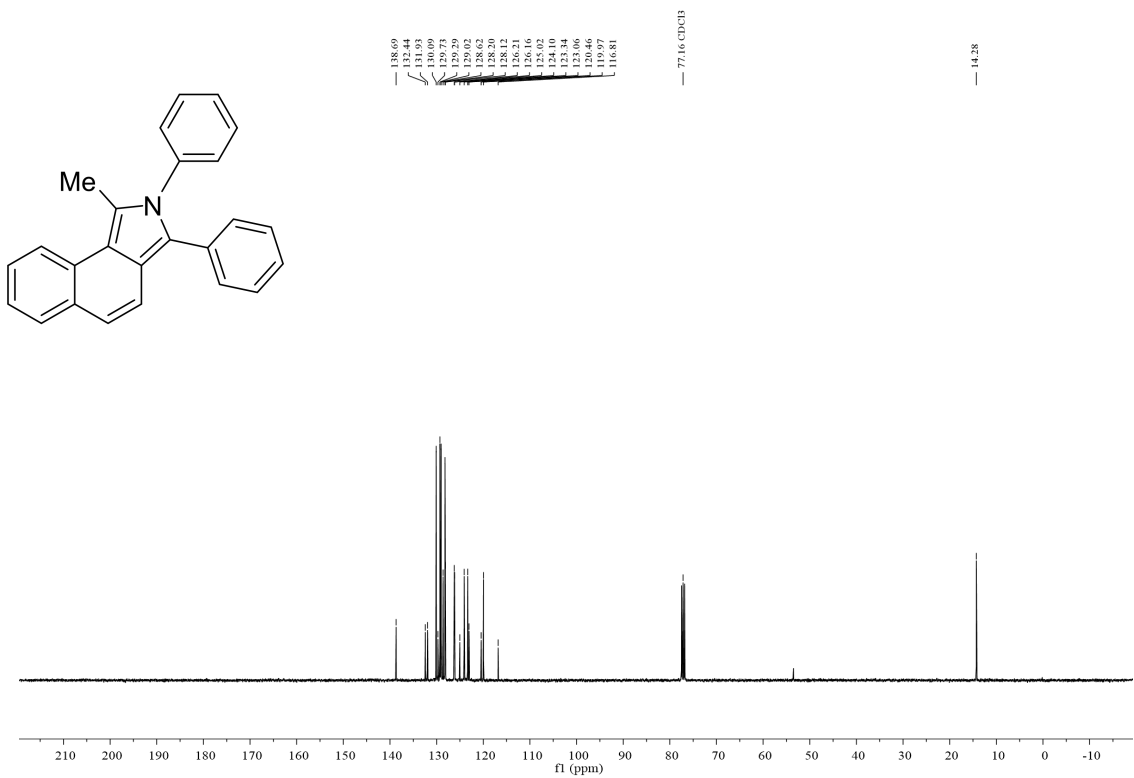

### <sup>1</sup>H NMR-3b (400 MHz, CDCl<sub>3</sub>)

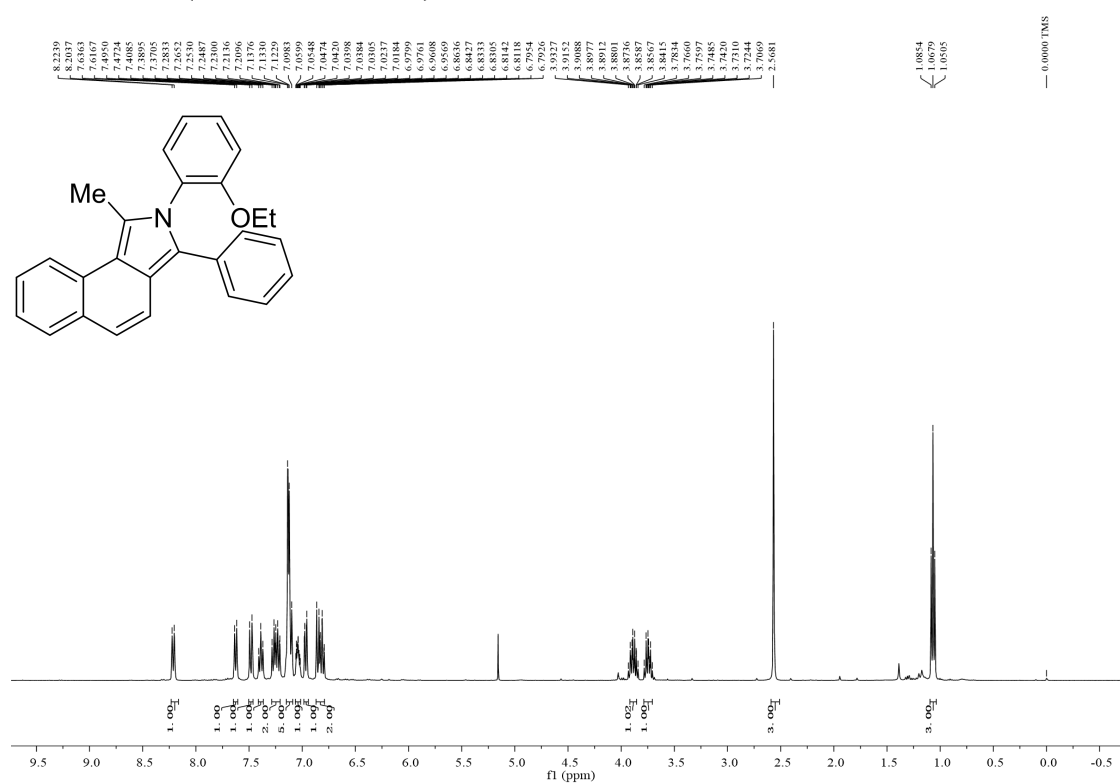

### <sup>13</sup>C NMR-3b (100 MHz, CDCl<sub>3</sub>)

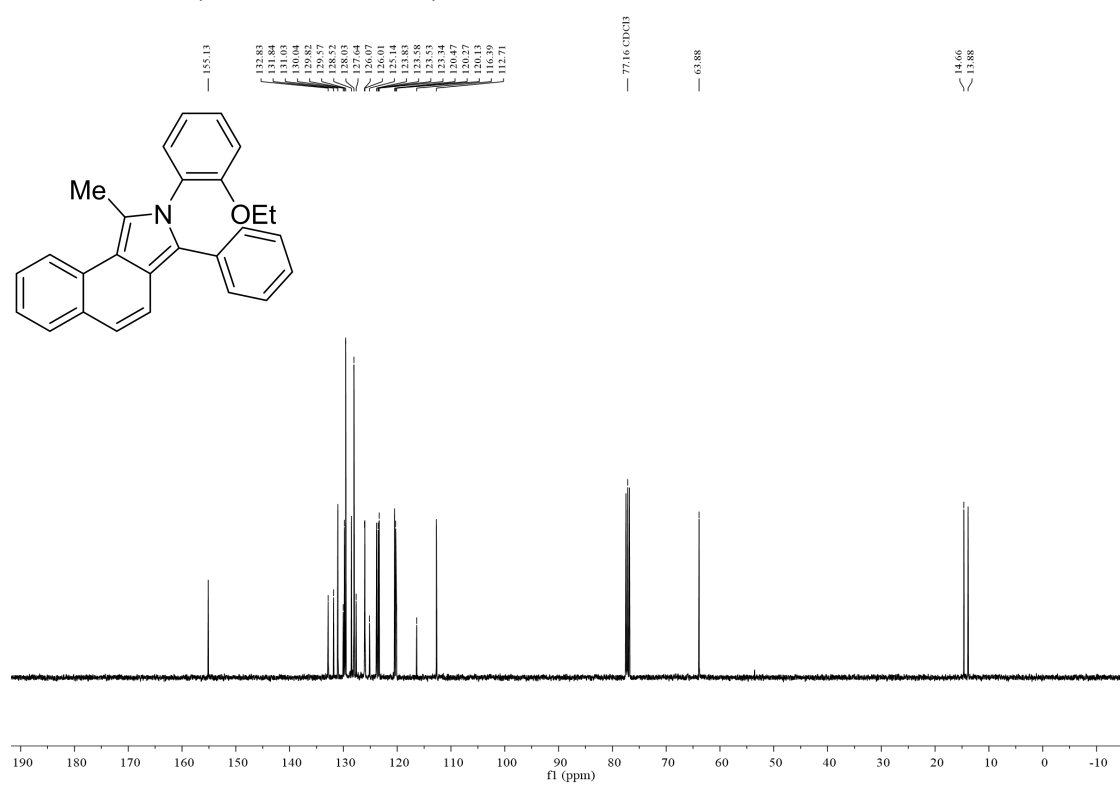

### <sup>1</sup>H NMR-3c (400 MHz, CDCl<sub>3</sub>)

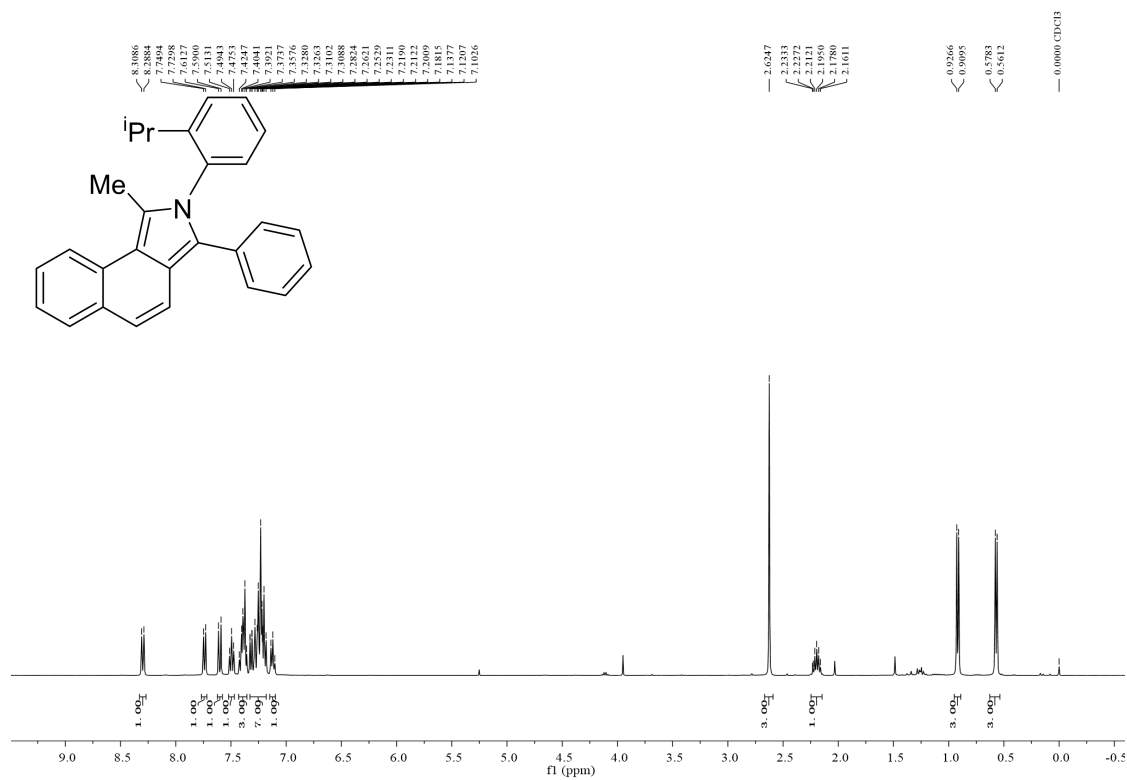

### <sup>13</sup>C NMR-3c (100 MHz, CDCl<sub>3</sub>)

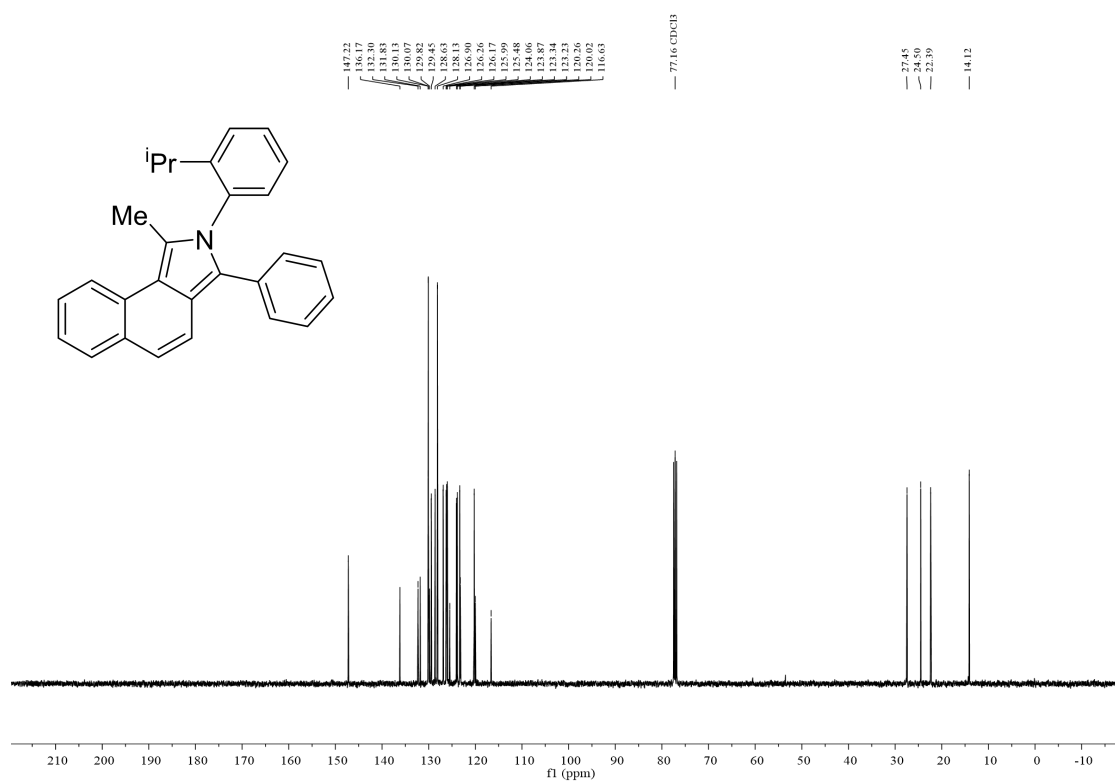

### <sup>1</sup>H NMR-3d (400 MHz, CDCl<sub>3</sub>)

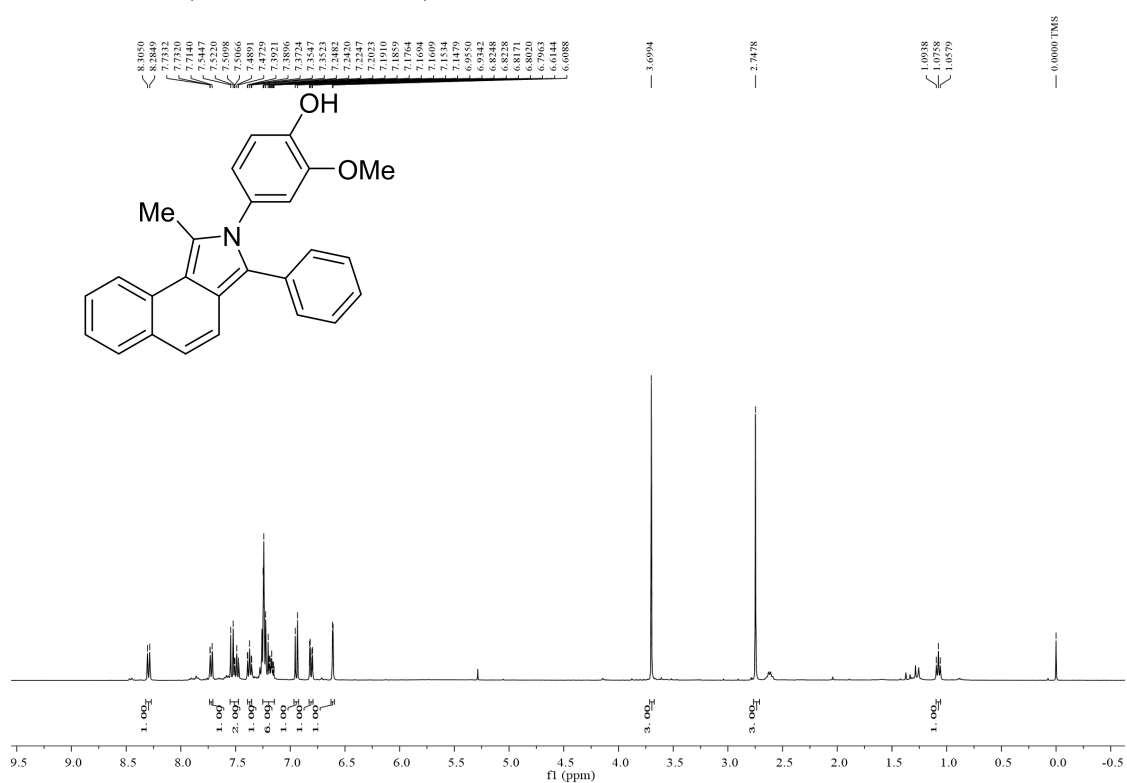

### <sup>13</sup>C NMR-3d (100 MHz, CDCl<sub>3</sub>)

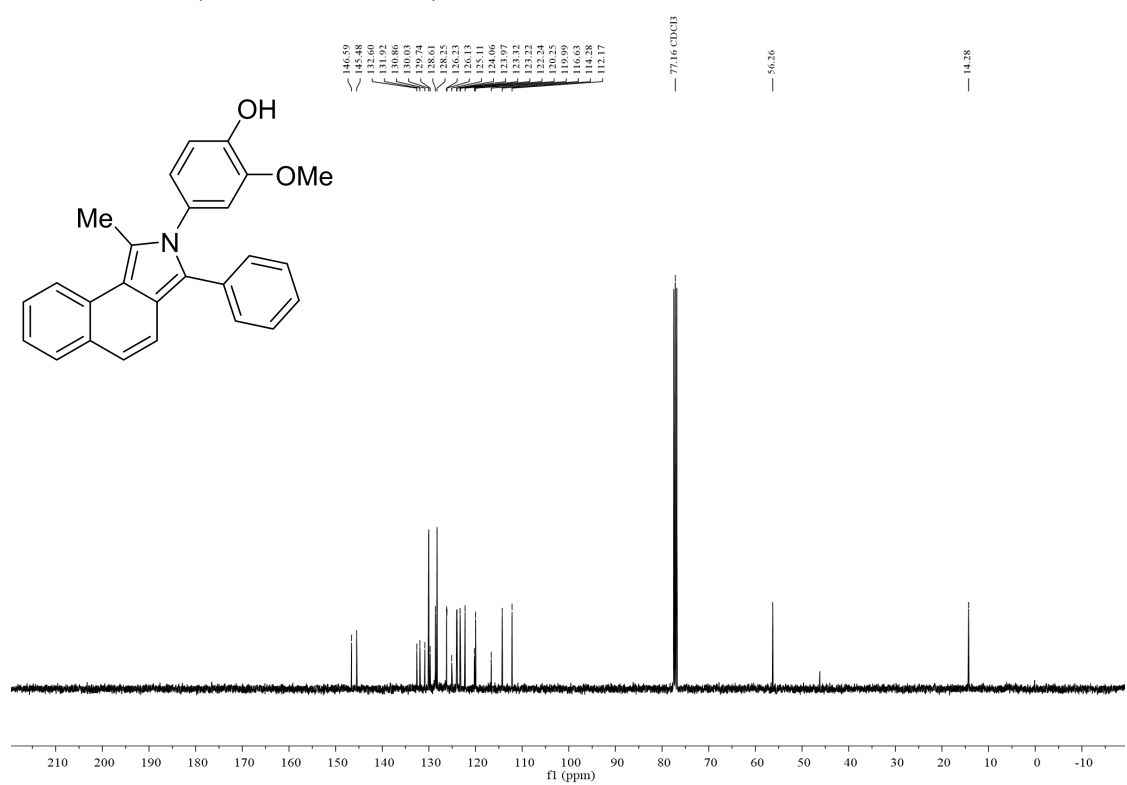

### <sup>1</sup>H NMR-3e (400 MHz, CDCl<sub>3</sub>)

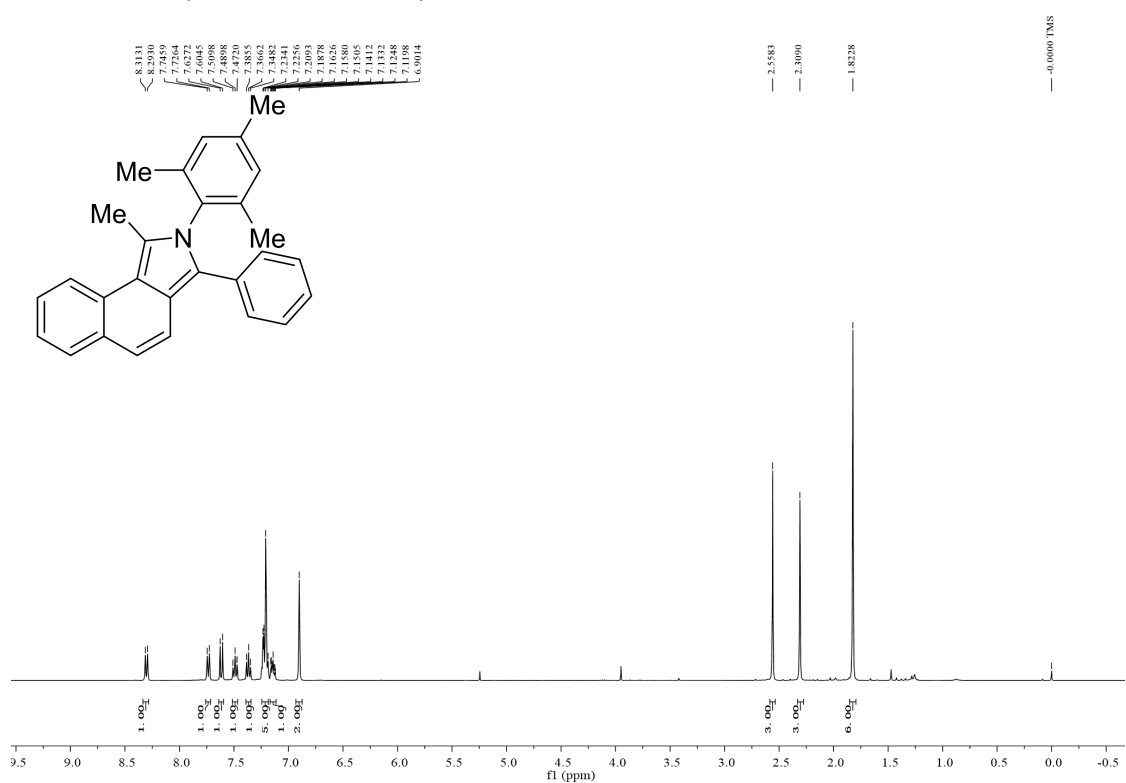

### <sup>13</sup>C NMR-3e (100 MHz, CDCl<sub>3</sub>)

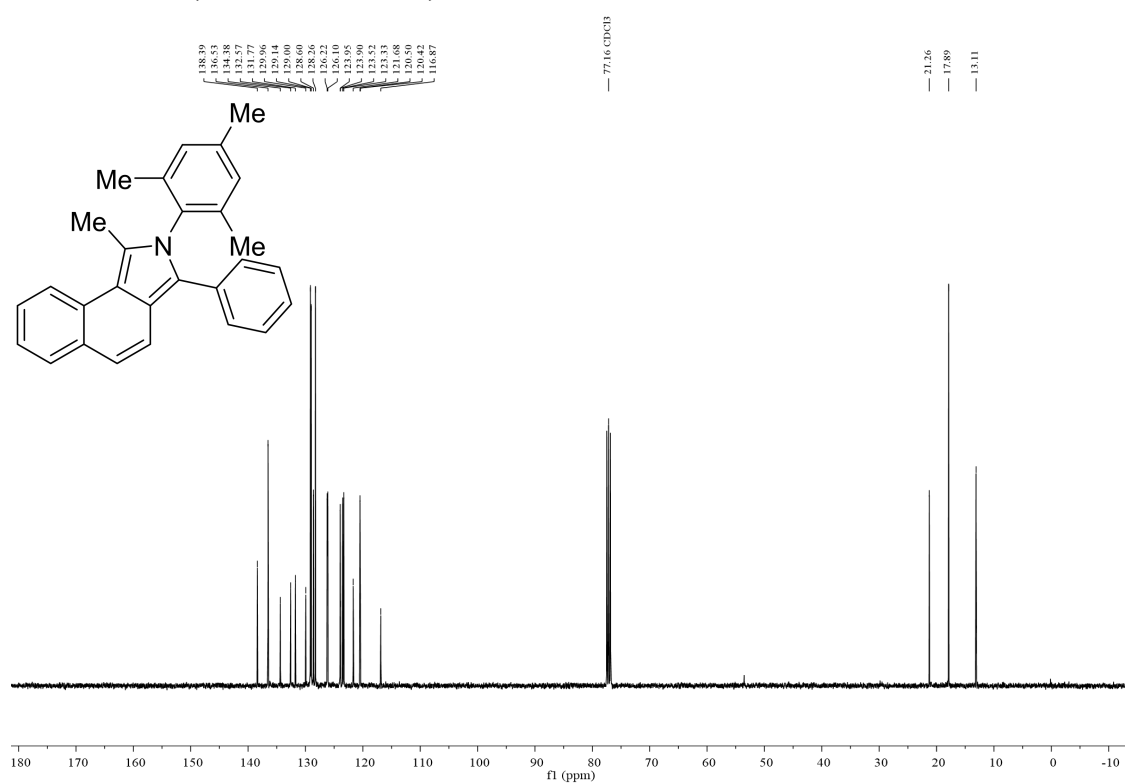

### <sup>1</sup>H NMR-3f (400 MHz, CDCl<sub>3</sub>)

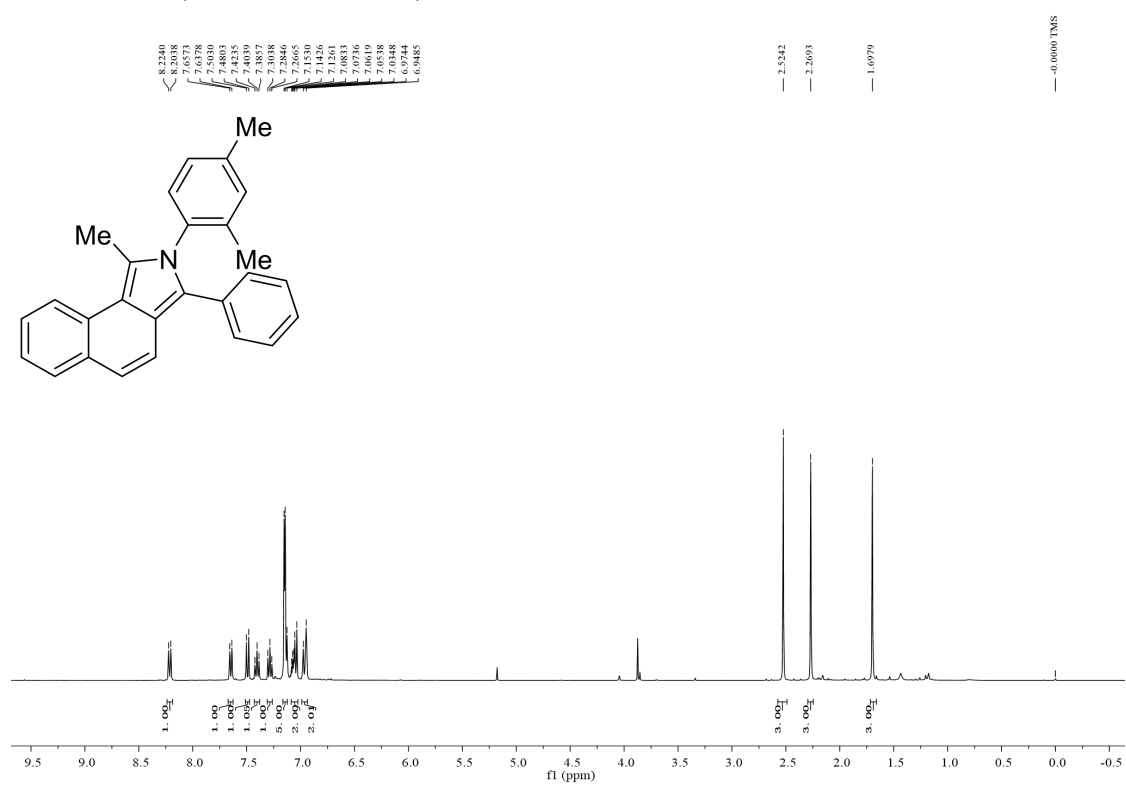

### <sup>13</sup>C NMR-3f (100 MHz, CDCl<sub>3</sub>)

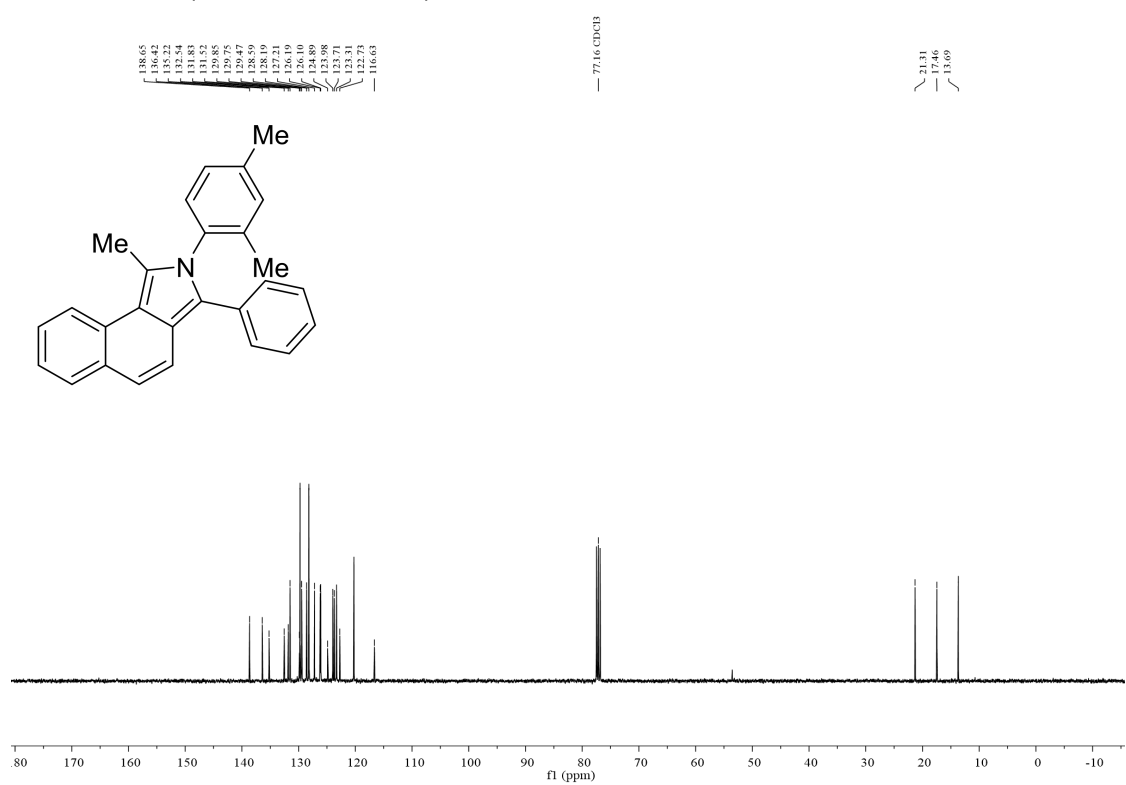

### <sup>1</sup>H NMR-3g (400 MHz, CDCl<sub>3</sub>)

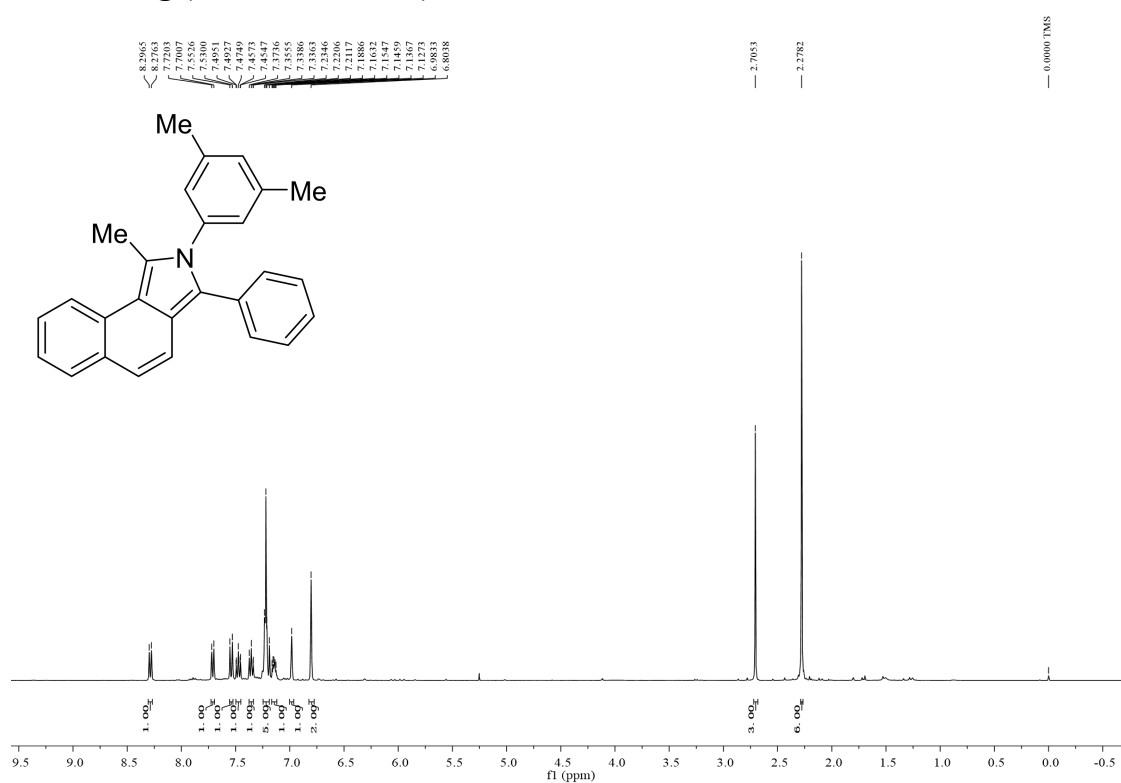

### <sup>13</sup>C NMR-3g (100 MHz, CDCl<sub>3</sub>)

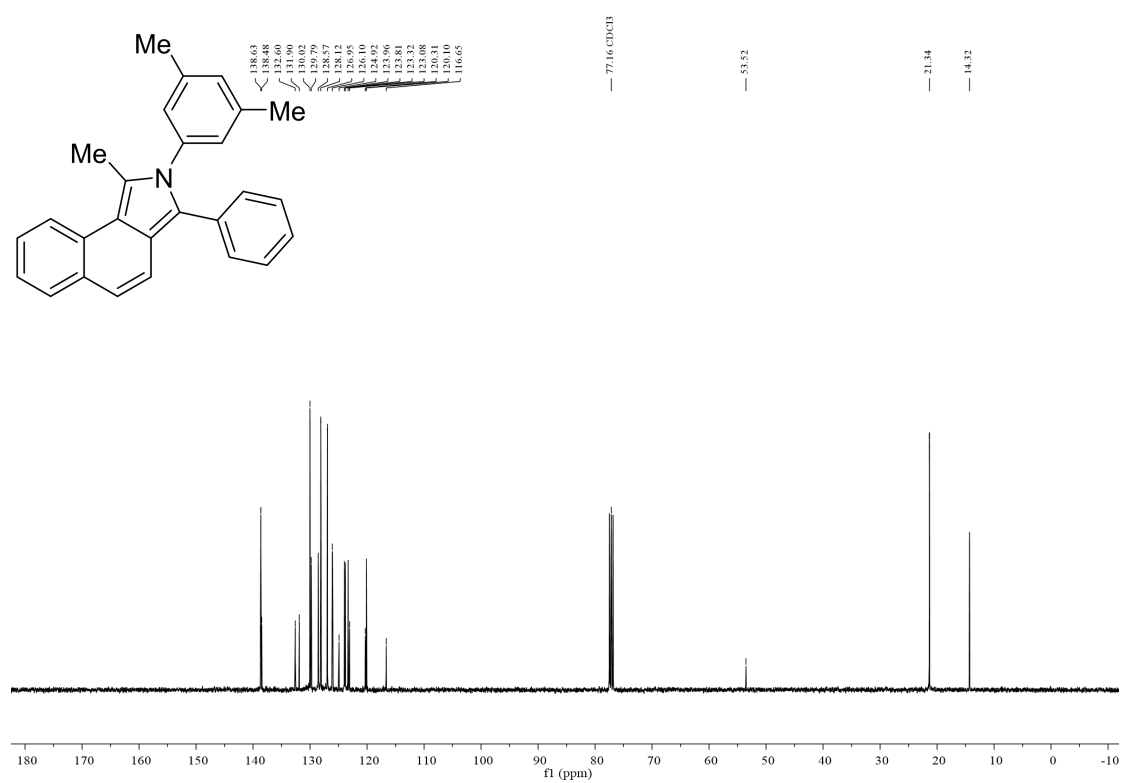

### <sup>1</sup>H NMR-3h (400 MHz, CDCl<sub>3</sub>)

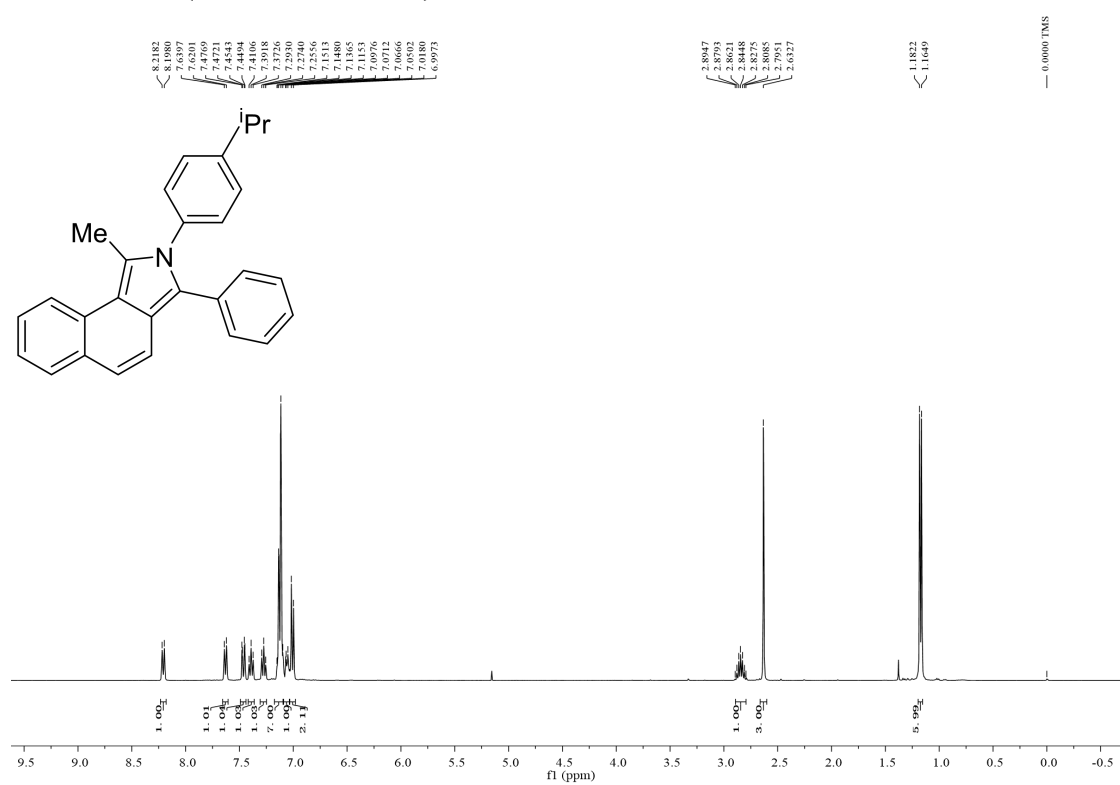

### <sup>13</sup>C NMR-3h (100 MHz, CDCl<sub>3</sub>)

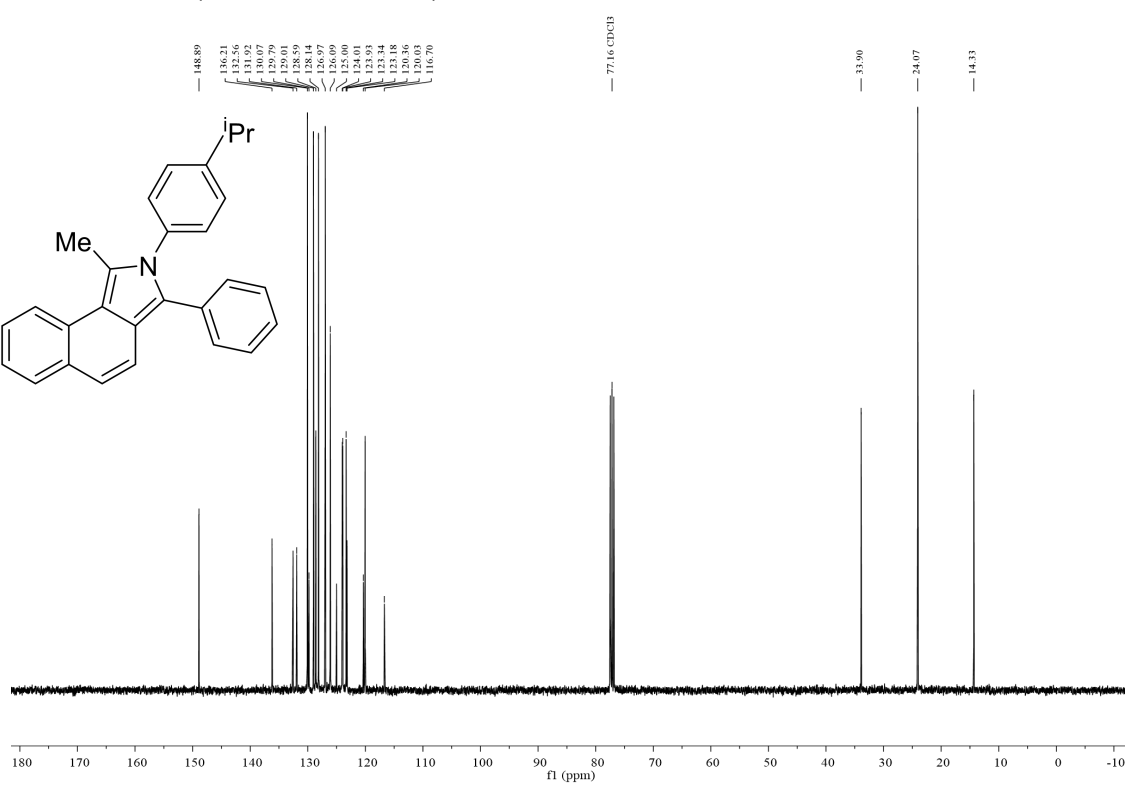

# <sup>1</sup>H NMR-3i (400 MHz, CDCl<sub>3</sub>)

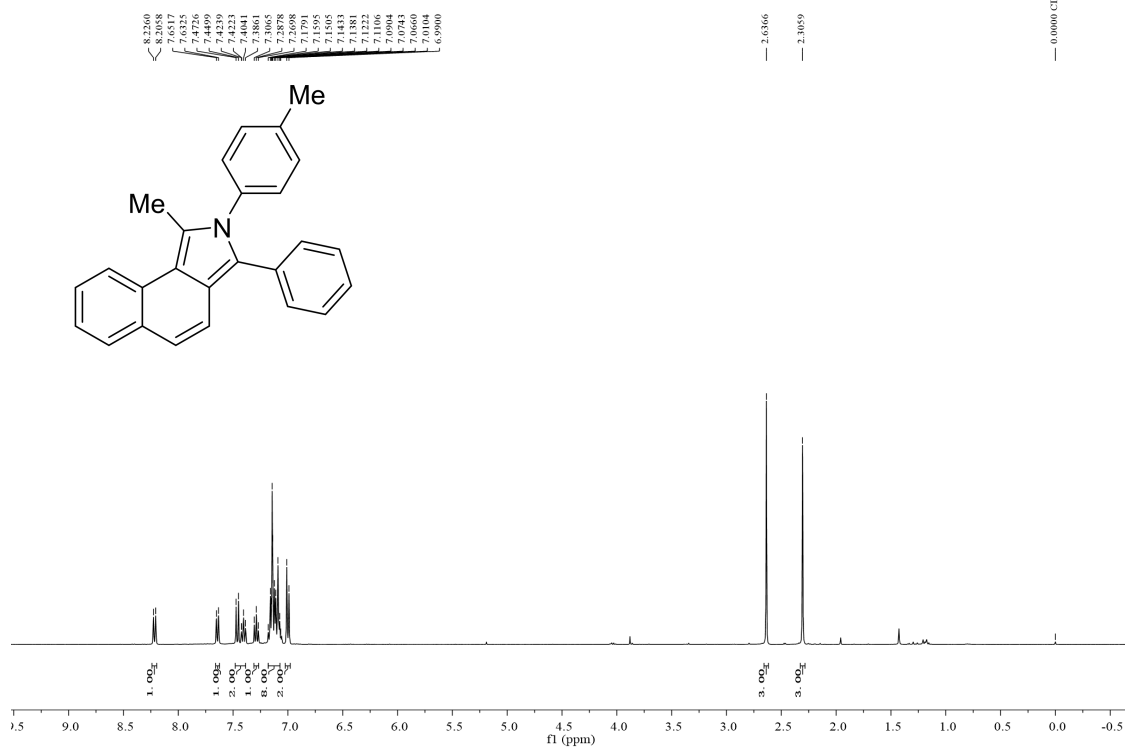

# <sup>13</sup>C NMR-3i (100 MHz, CDCl<sub>3</sub>)

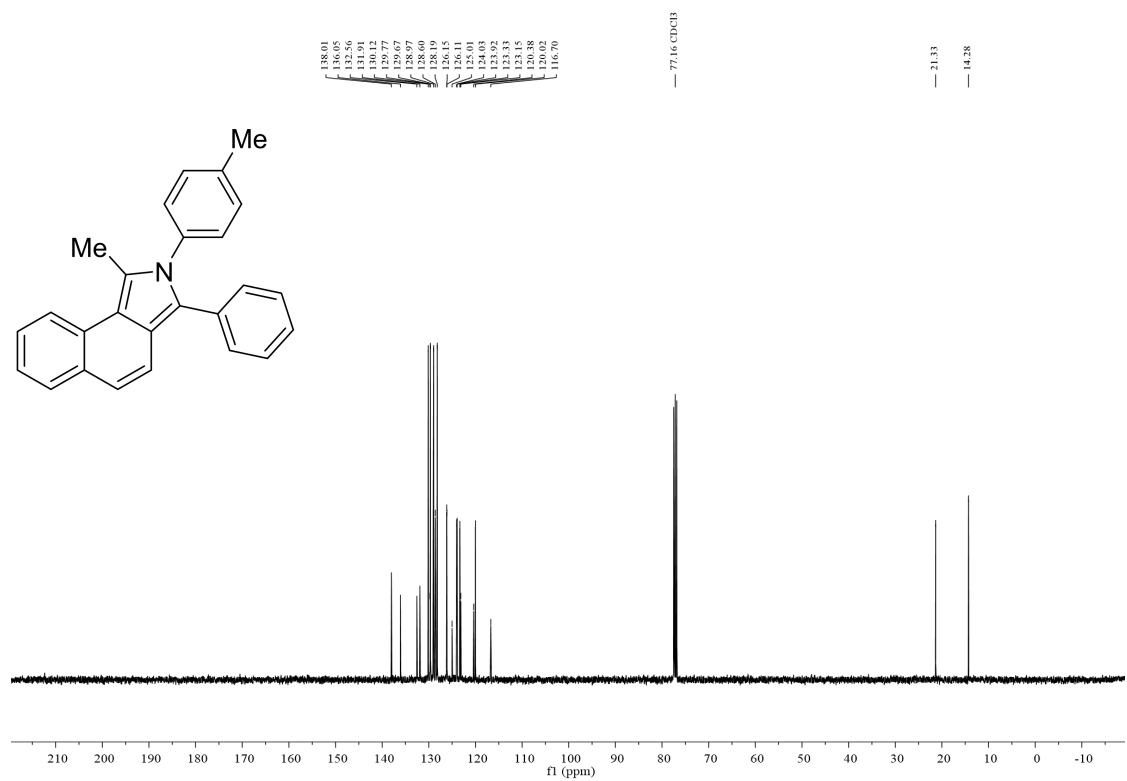

### <sup>1</sup>H NMR-3j (400 MHz, CDCl<sub>3</sub>)

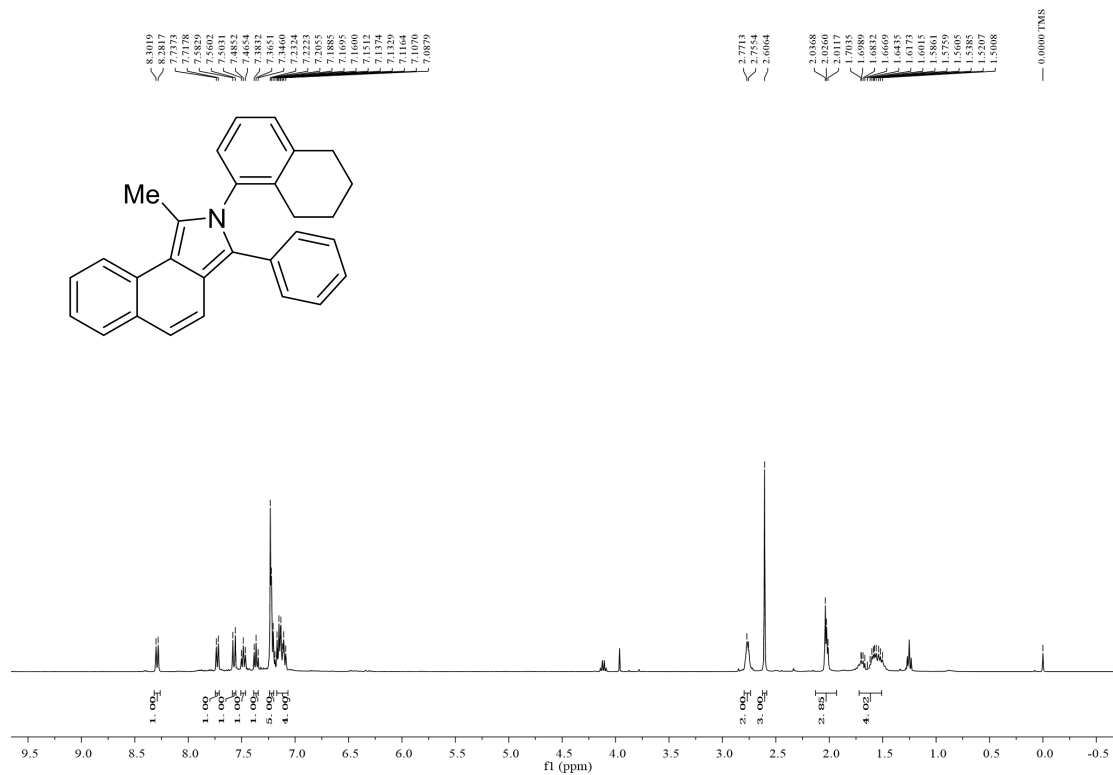

### <sup>13</sup>C NMR-3j (100 MHz, CDCl<sub>3</sub>)

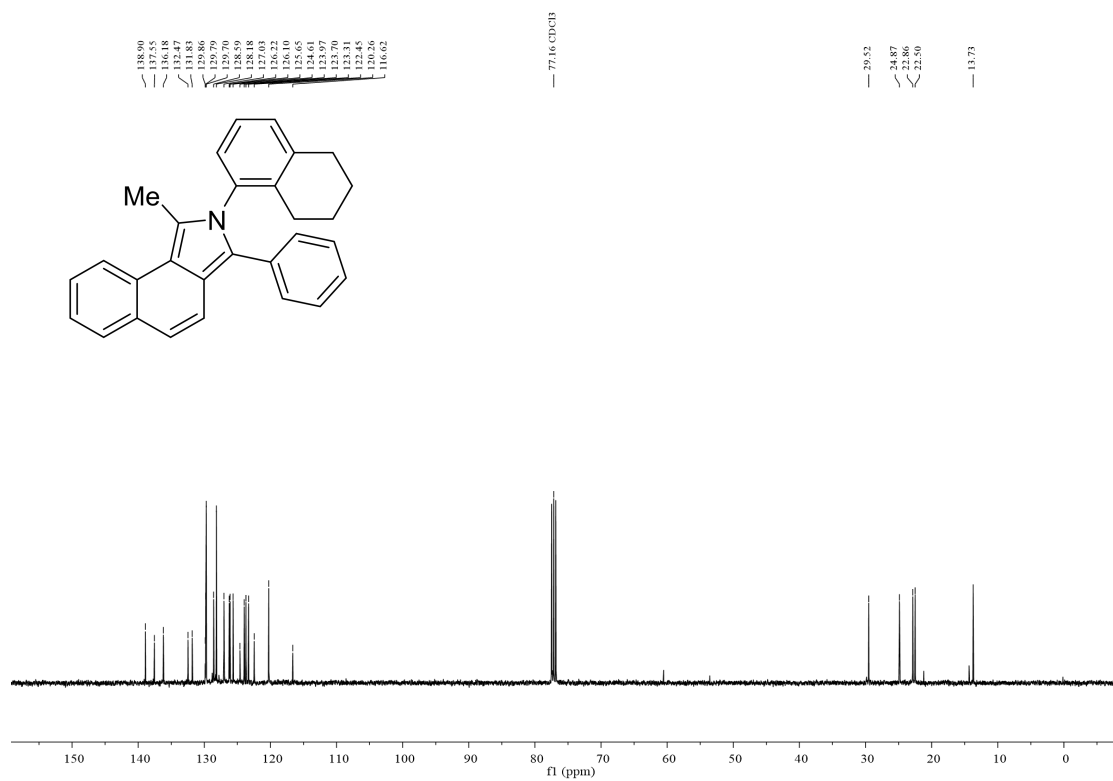

### <sup>1</sup>H NMR-3k (400 MHz, CDCl<sub>3</sub>)

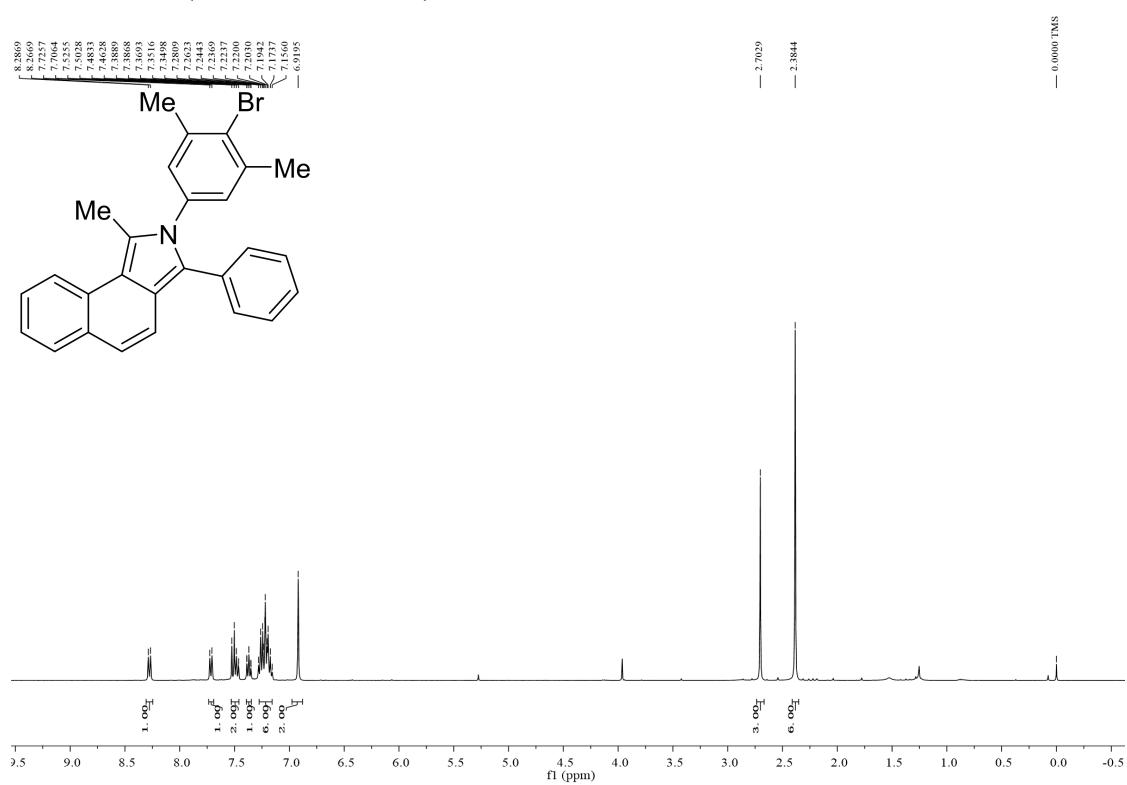

### <sup>13</sup>C NMR-3k (100 MHz, CDCl<sub>3</sub>)

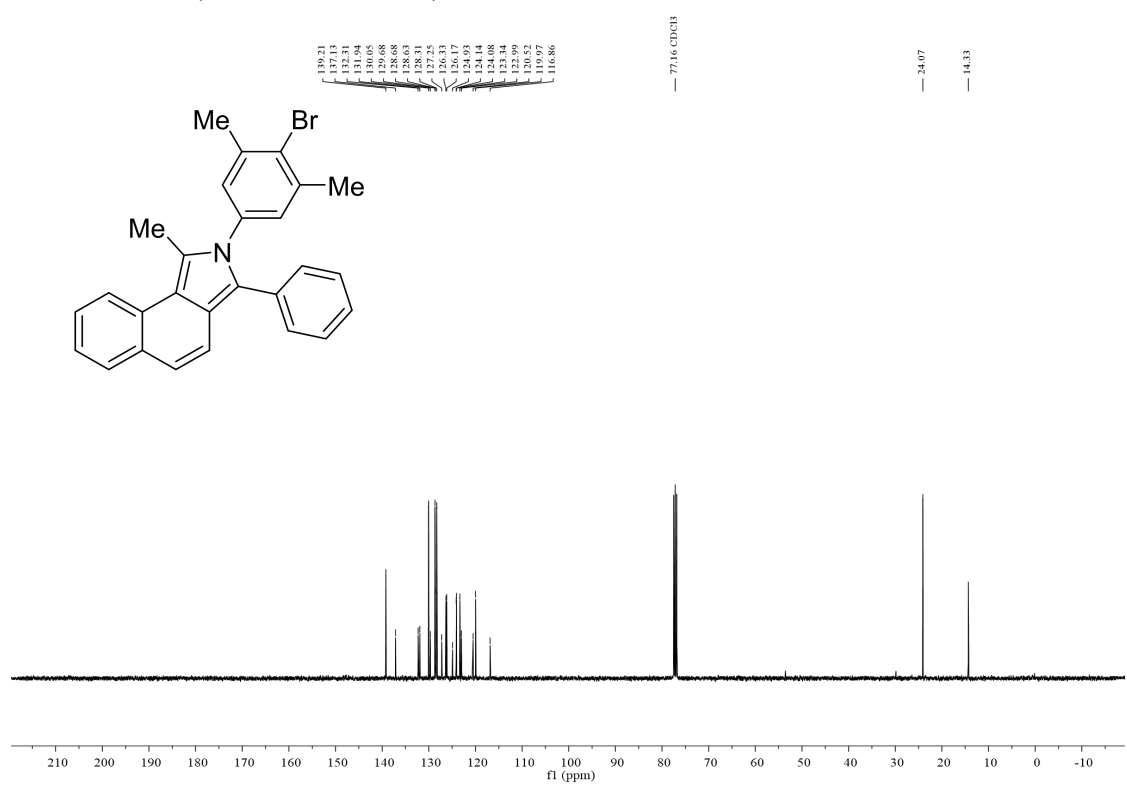

# <sup>1</sup>H NMR-31 (400 MHz, CDCl<sub>3</sub>)

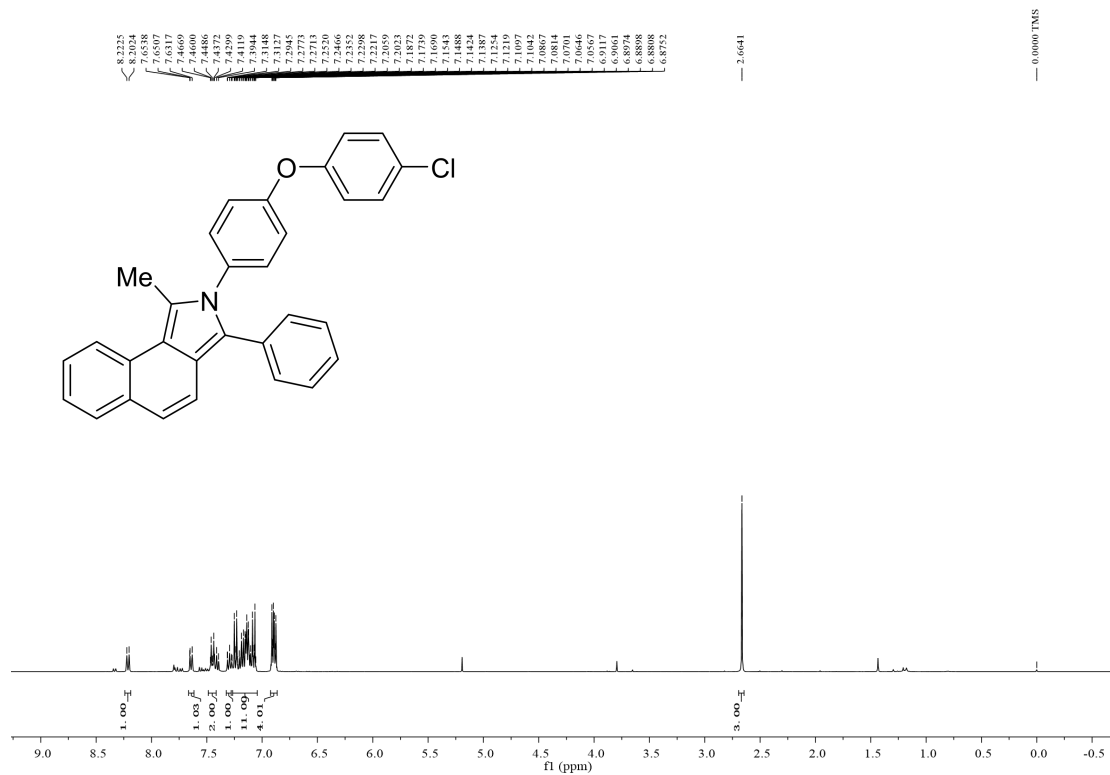

# <sup>13</sup>C NMR-31 (100 MHz, CDCl<sub>3</sub>)

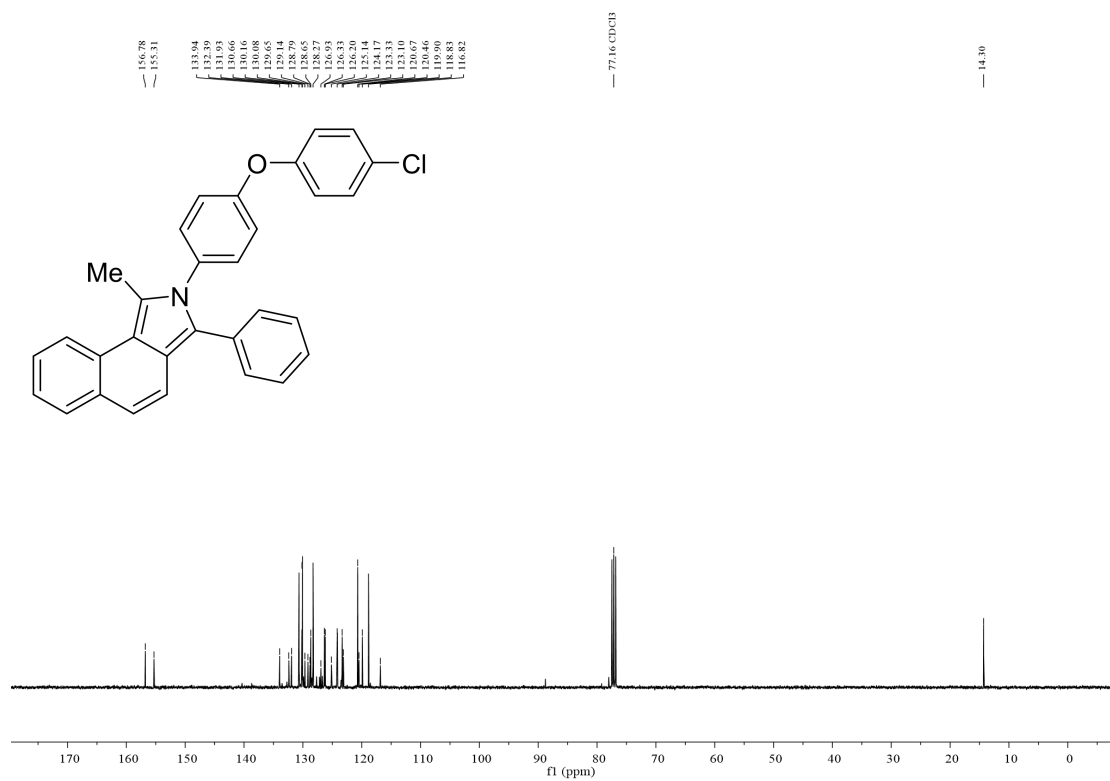

# <sup>1</sup>H NMR-3m (400 MHz, CDCl<sub>3</sub>)

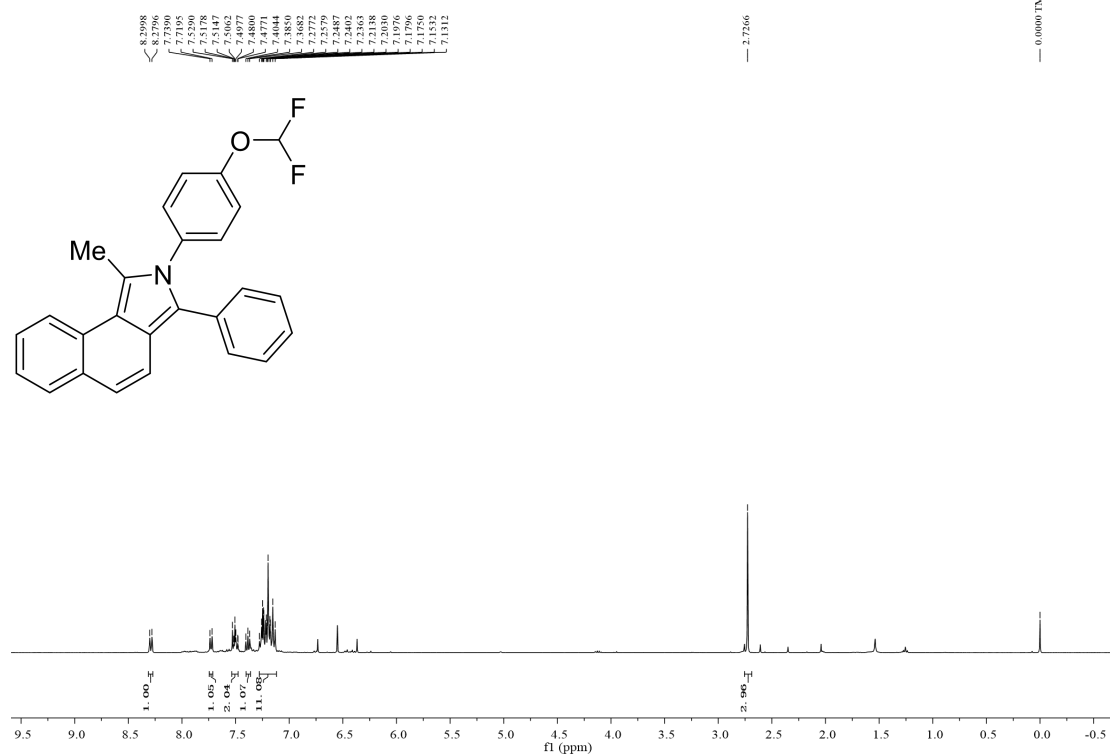

# <sup>13</sup>C NMR-3m (100 MHz, CDCl<sub>3</sub>)

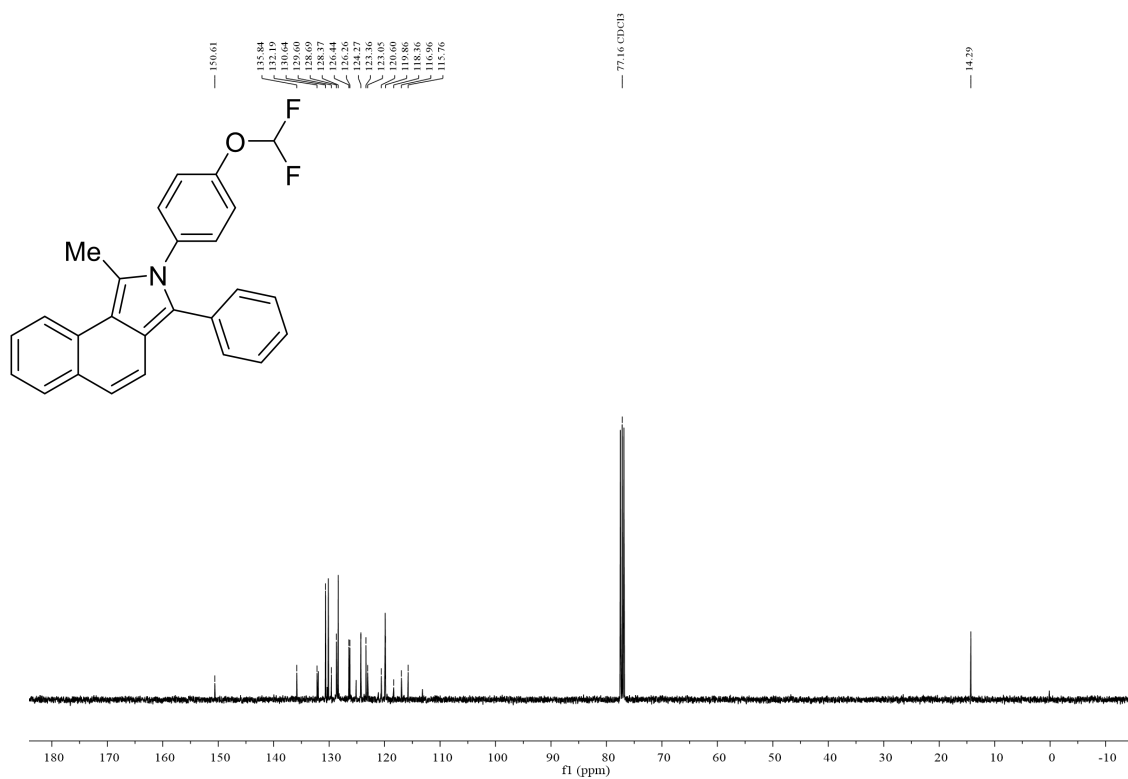

**<sup>19</sup>F NMR-3m (376 MHz, CDCl<sub>3</sub>)**

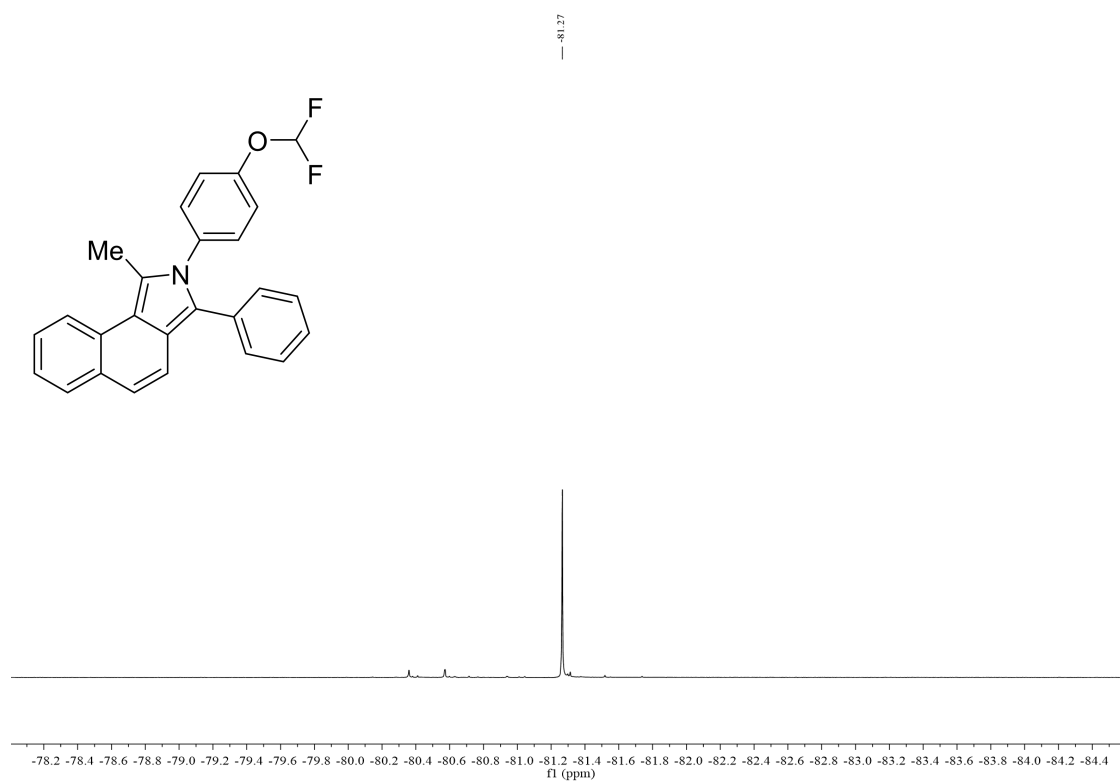

### <sup>1</sup>H NMR-3n (400 MHz, CDCl<sub>3</sub>)

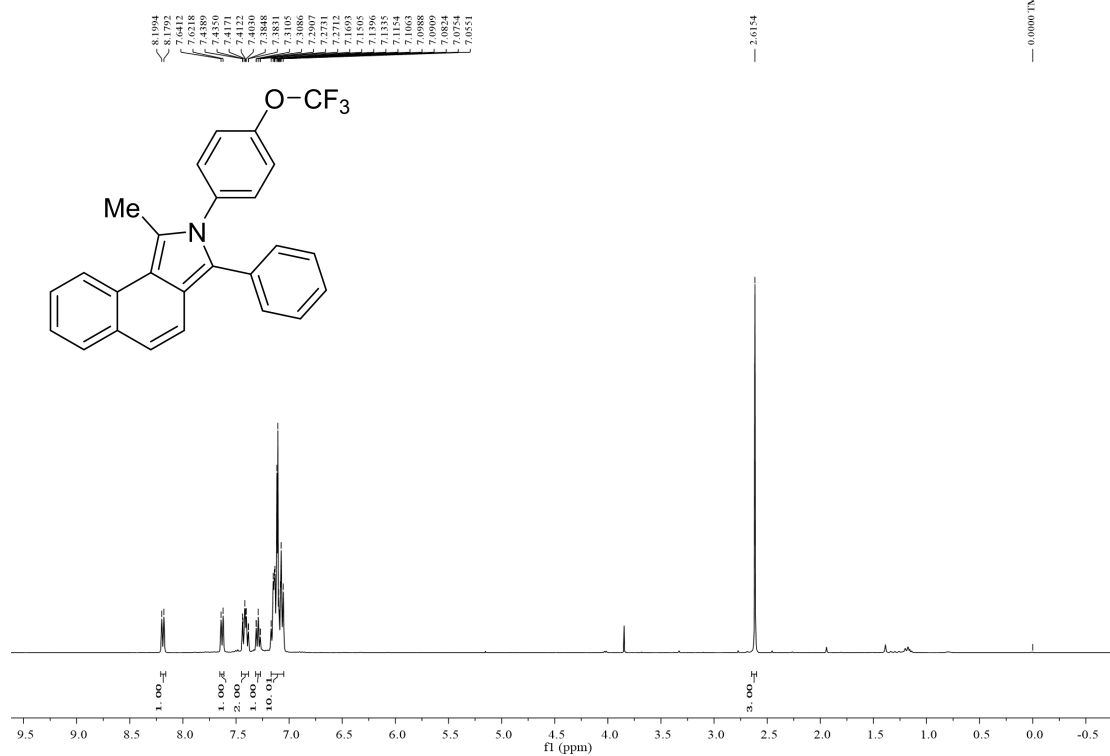

### <sup>13</sup>C NMR-3n (100 MHz, CDCl<sub>3</sub>)

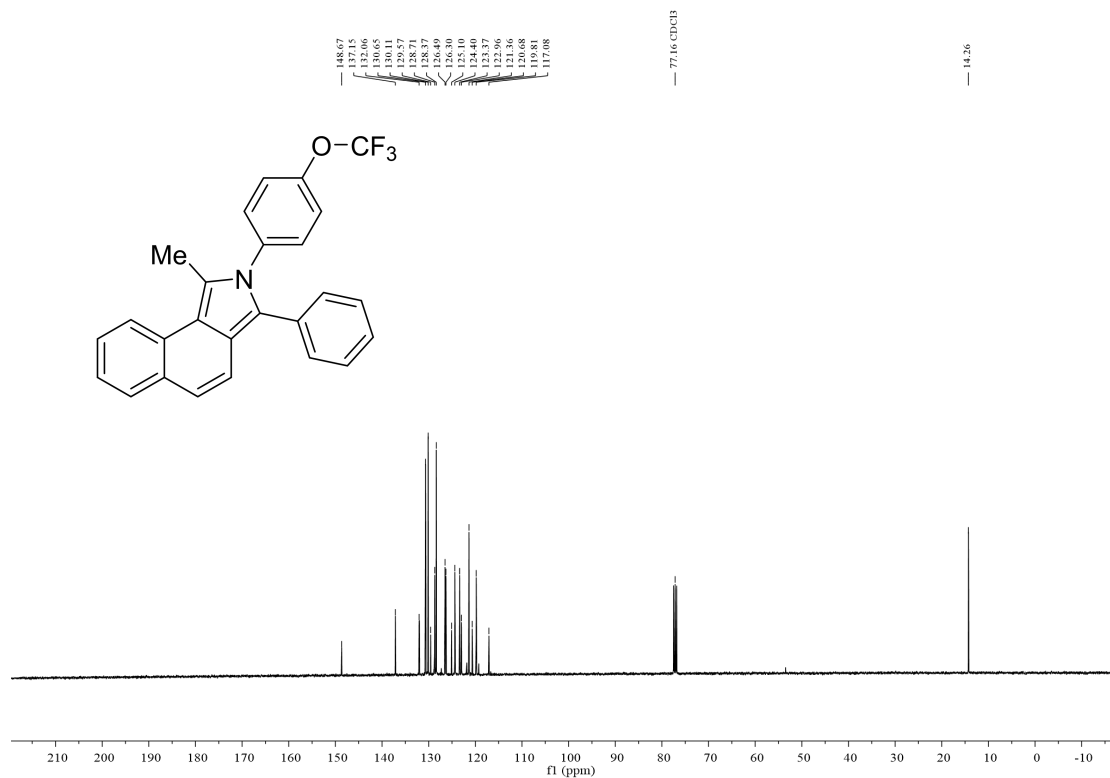

**<sup>19</sup>F NMR-3n (376 MHz, CDCl<sub>3</sub>)**

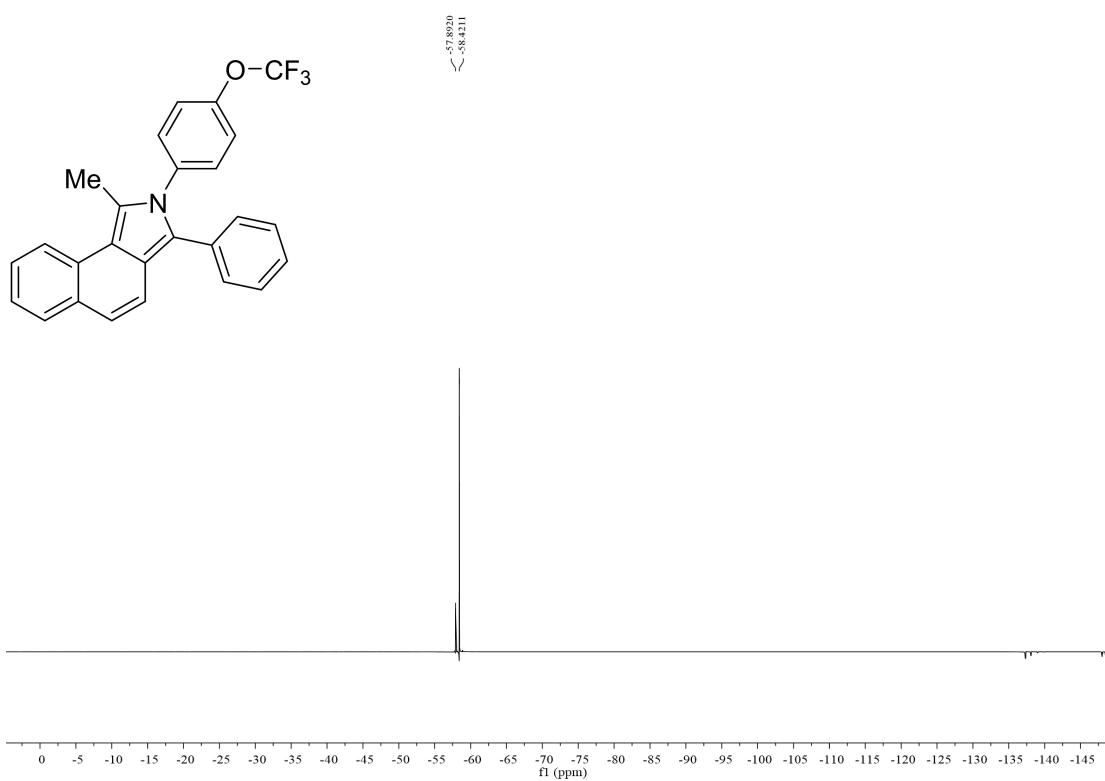

# <sup>1</sup>H NMR-3o (400 MHz, CDCl<sub>3</sub>)

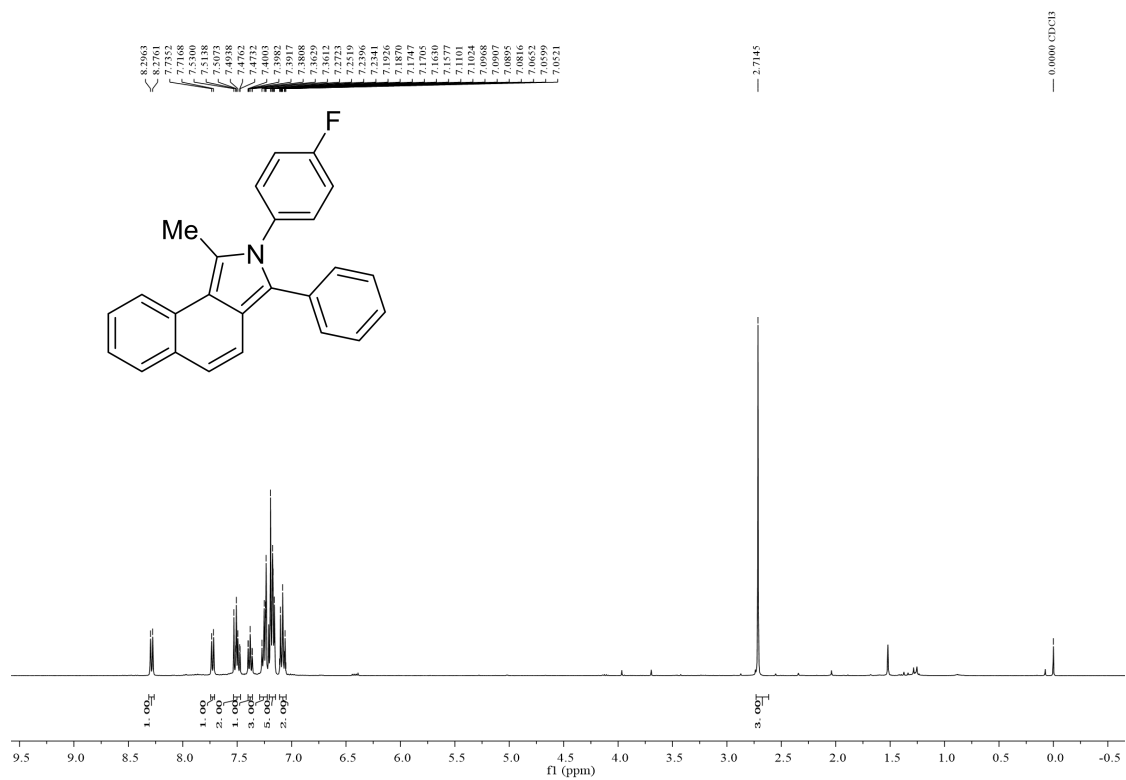

# <sup>13</sup>C NMR-3o (100 MHz, CDCl<sub>3</sub>)

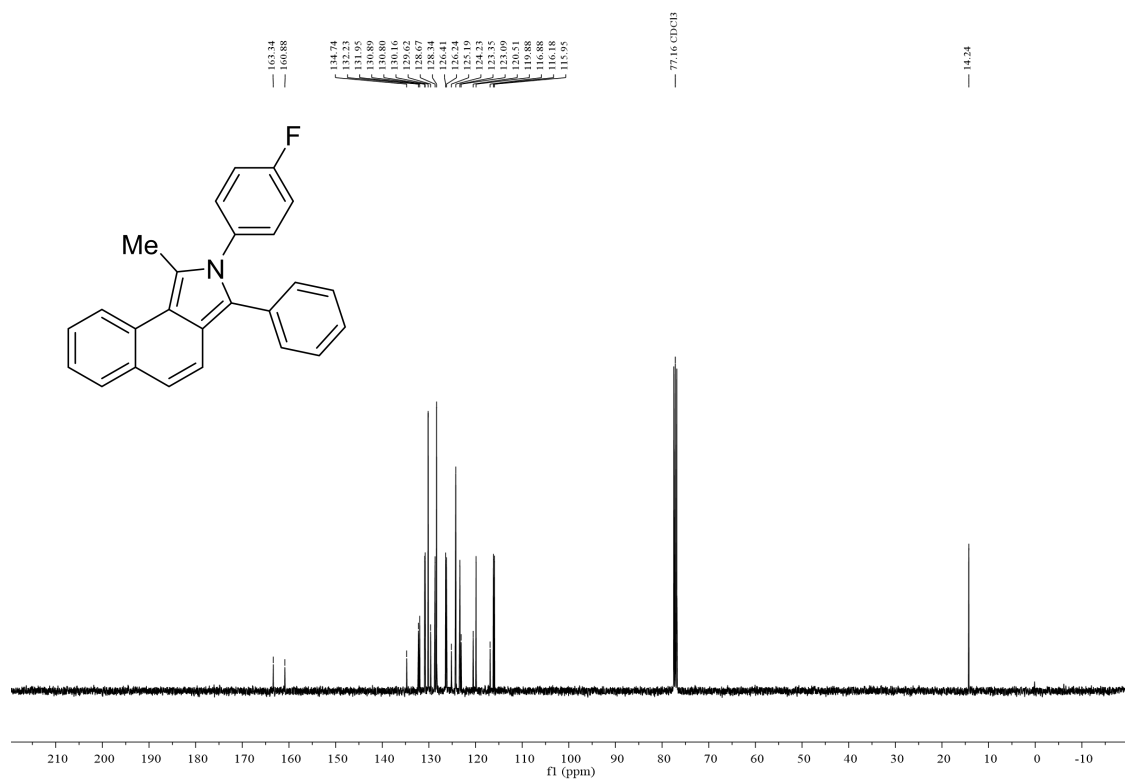

**<sup>19</sup>F NMR-3o (376 MHz, CDCl<sub>3</sub>)**

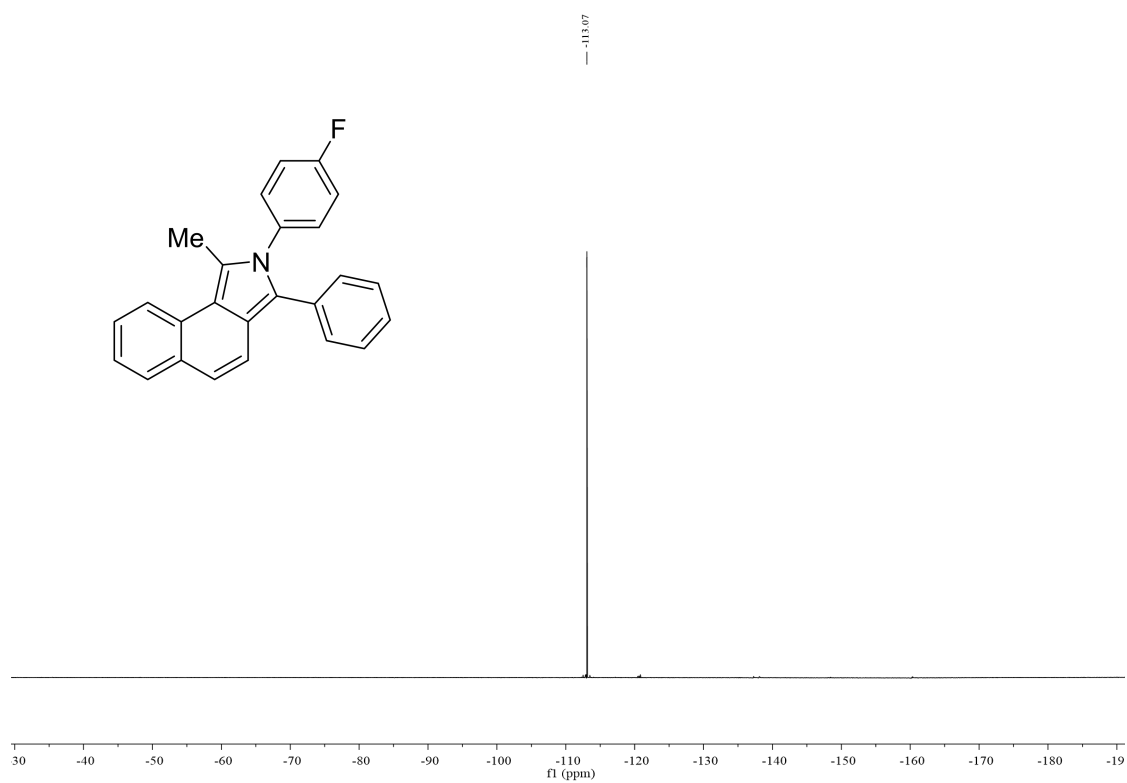

### <sup>1</sup>H NMR-3p (400 MHz, CDCl<sub>3</sub>)

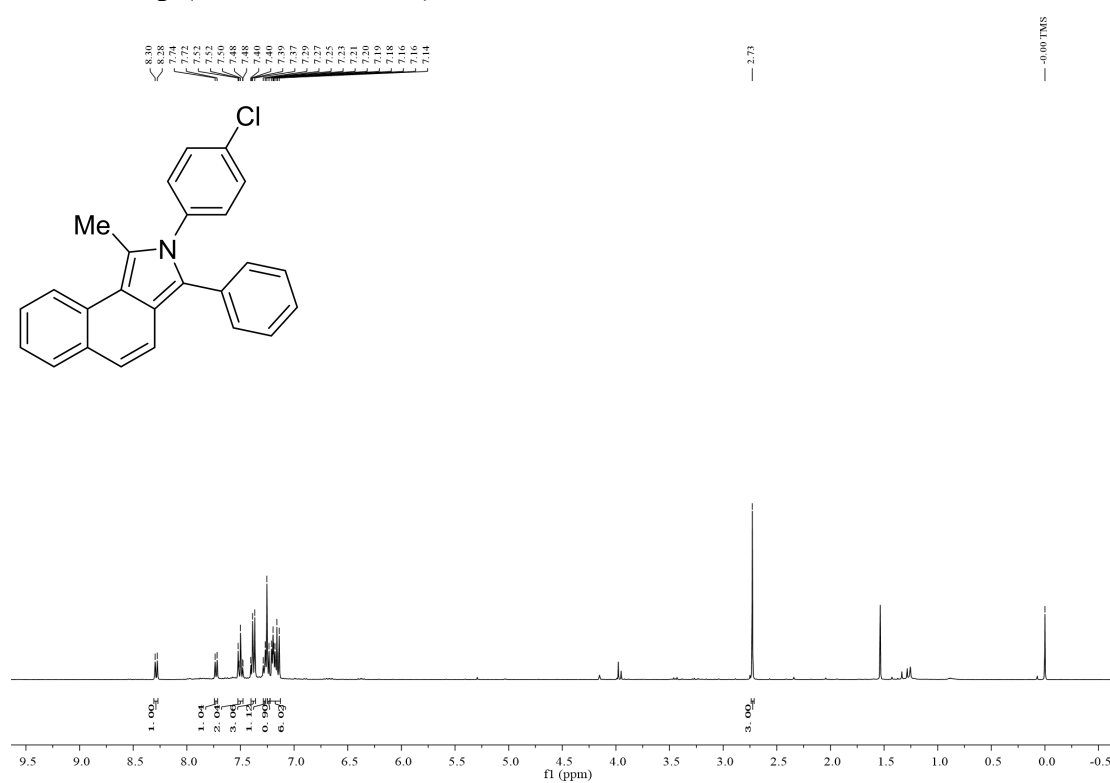

### <sup>13</sup>C NMR-3p (100 MHz, CDCl<sub>3</sub>)

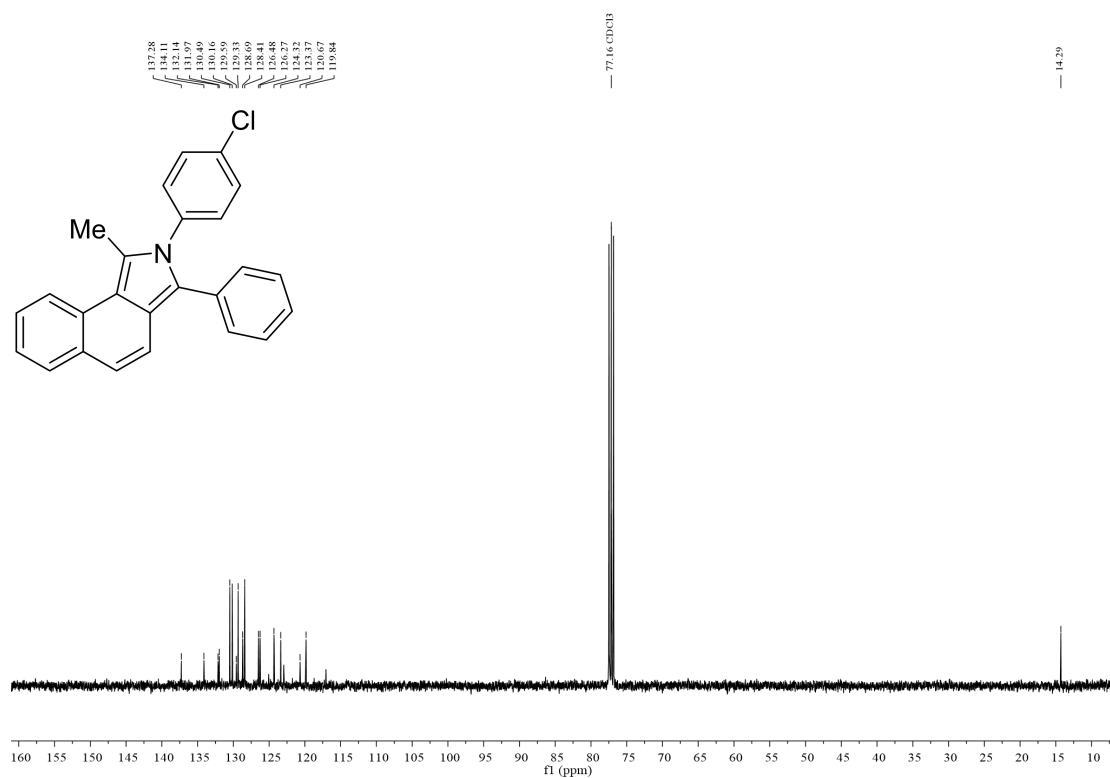

# <sup>1</sup>H NMR-3q (400 MHz, CDCl<sub>3</sub>)

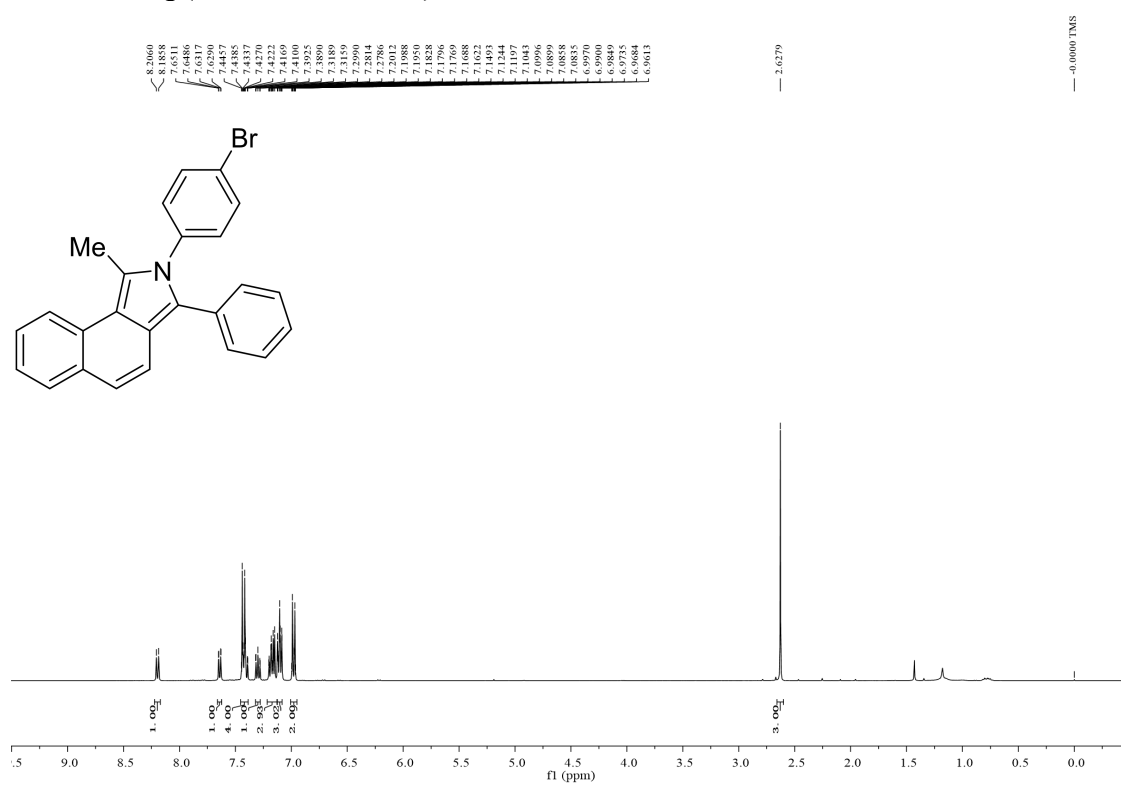

# <sup>13</sup>C NMR-3q (100 MHz, CDCl<sub>3</sub>)

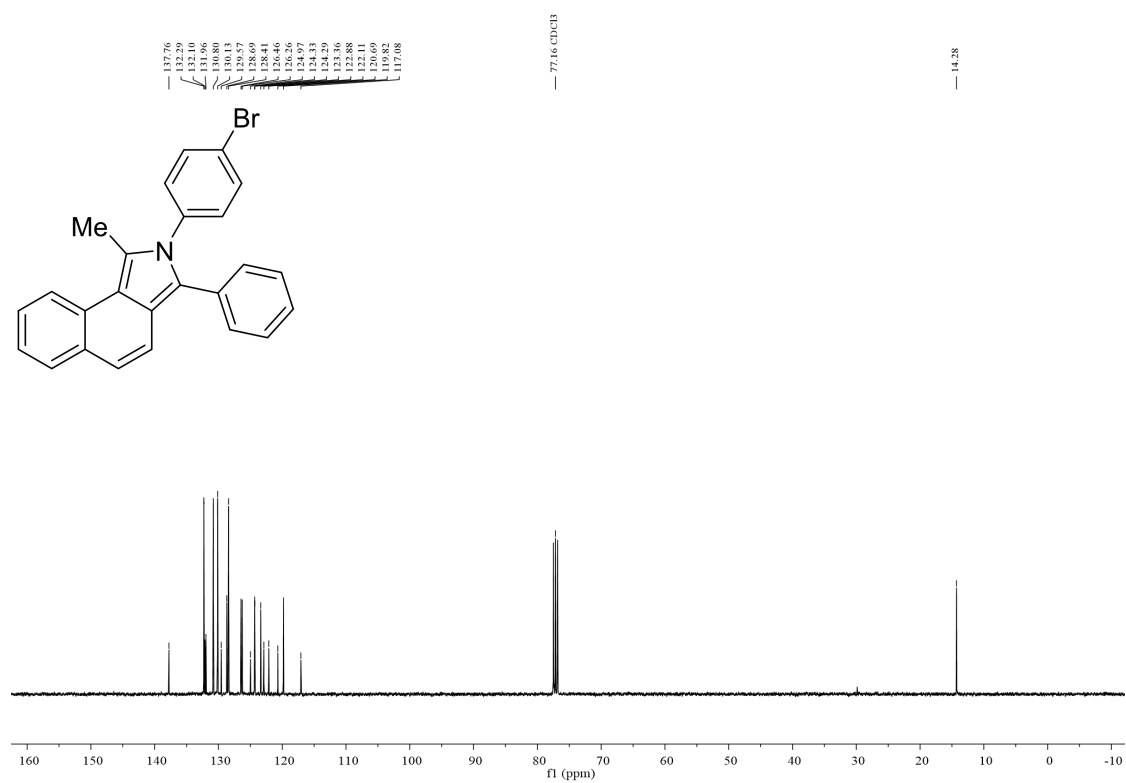

### <sup>1</sup>H NMR-3r (400 MHz, CDCl<sub>3</sub>)

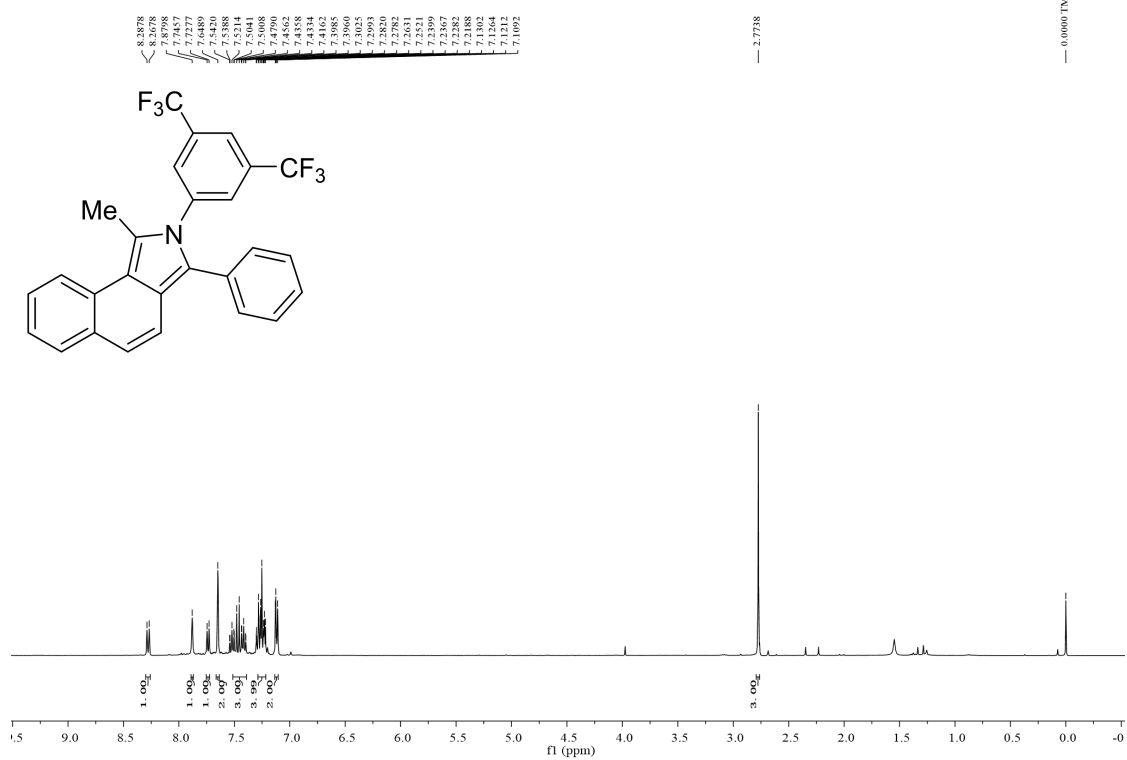

### <sup>13</sup>C NMR-3r (100 MHz, CDCl<sub>3</sub>)

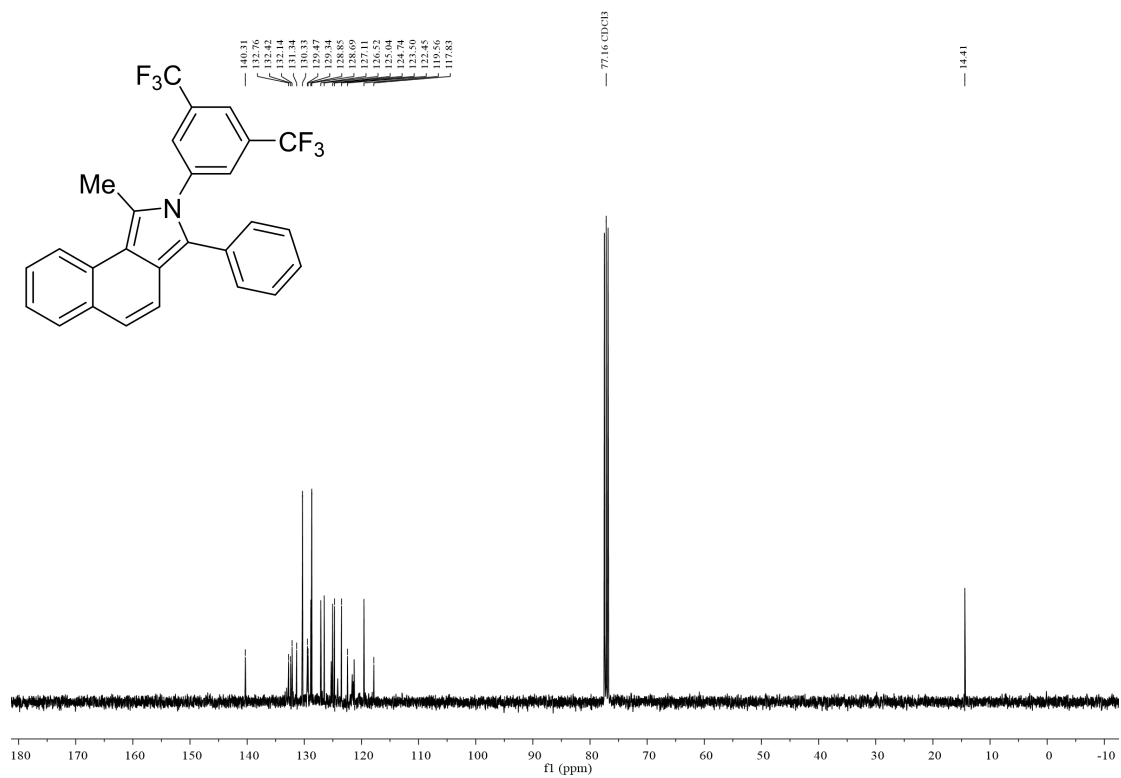

**<sup>19</sup>F NMR-3r (376 MHz, CDCl<sub>3</sub>)**

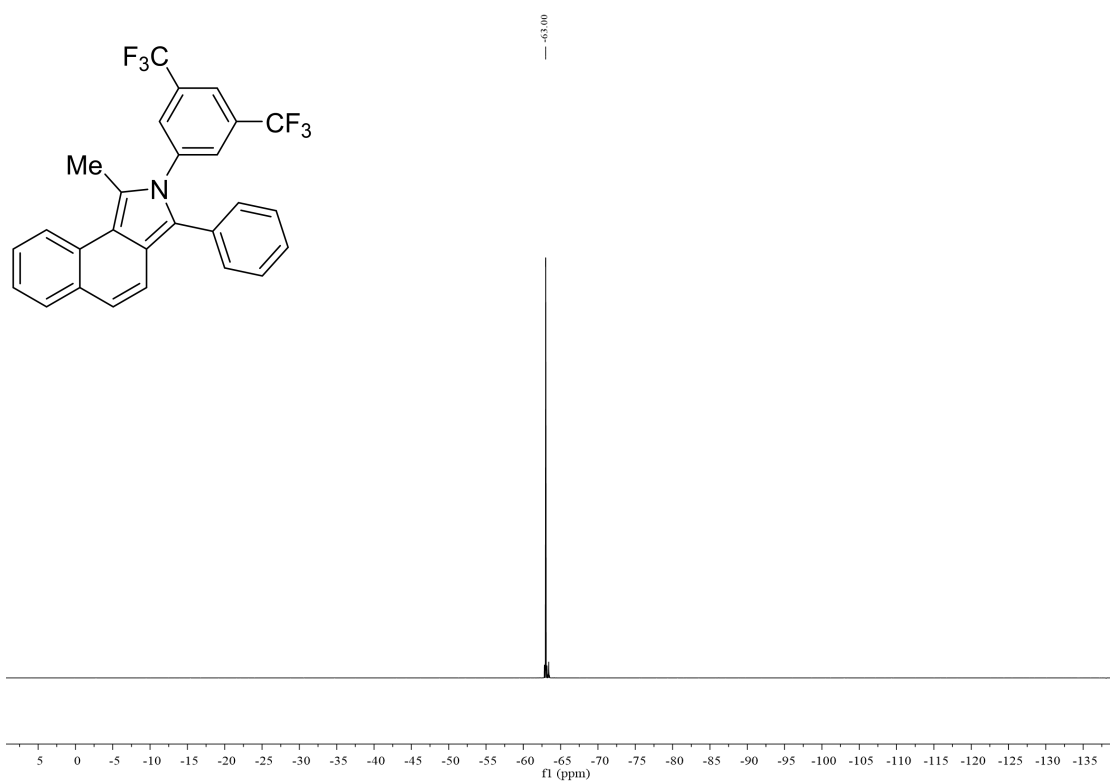

### <sup>1</sup>H NMR-3s (400 MHz, CDCl<sub>3</sub>)

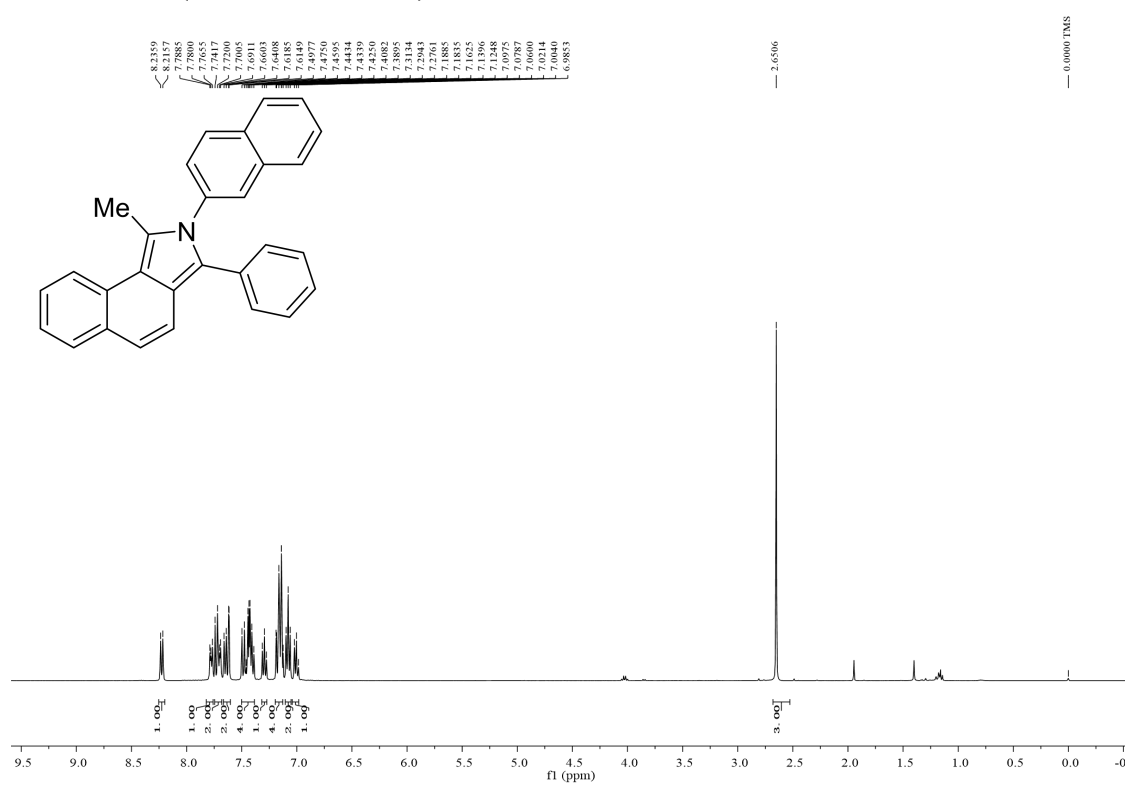

### <sup>13</sup>C NMR-3s (100 MHz, CDCl<sub>3</sub>)

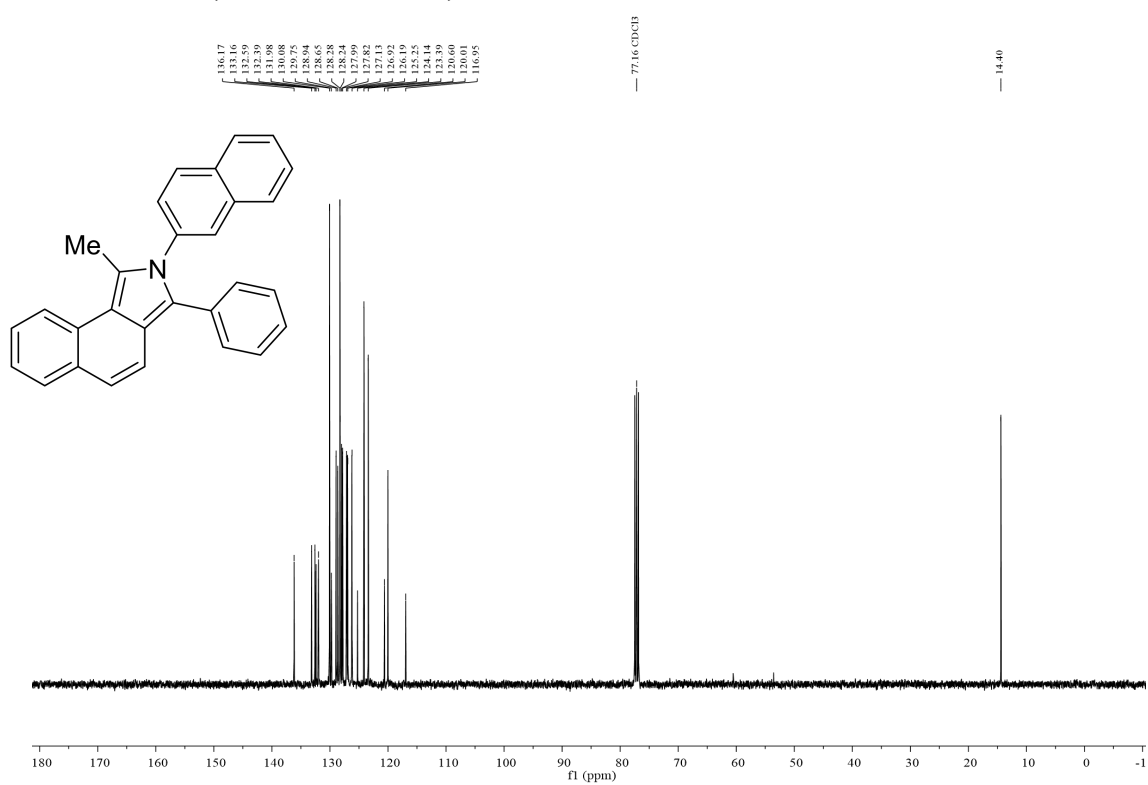

# <sup>1</sup>H NMR-3t (400 MHz, CDCl<sub>3</sub>)

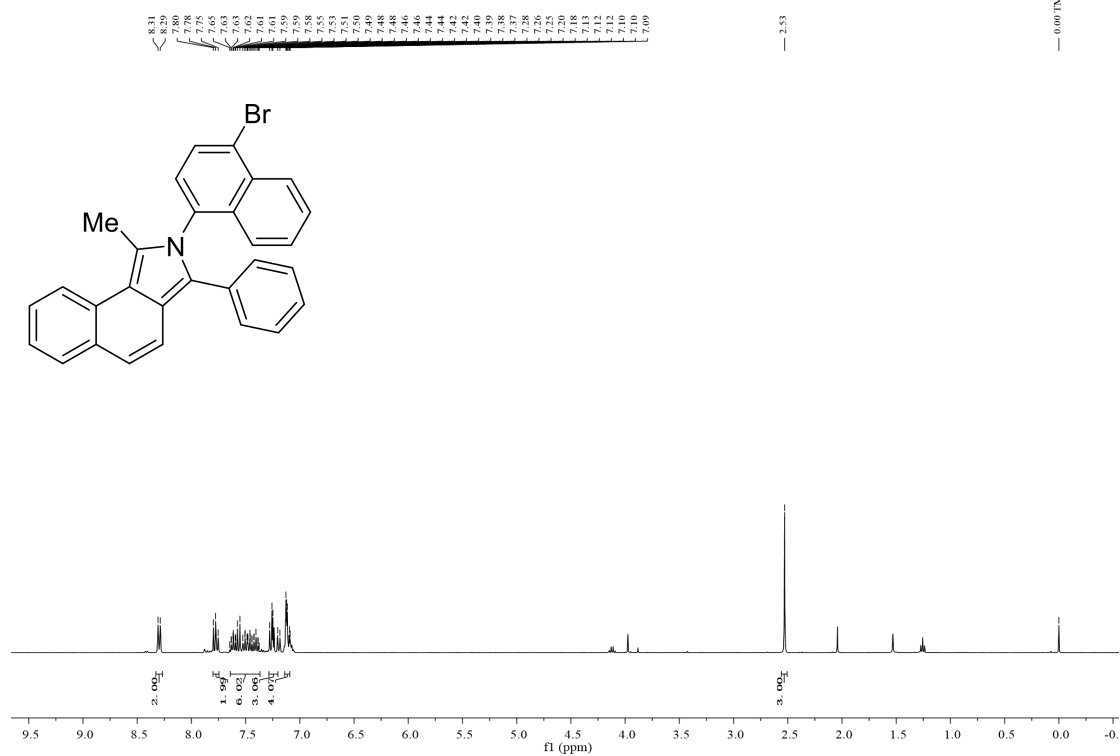

# <sup>13</sup>C NMR-3t (100 MHz, CDCl<sub>3</sub>)

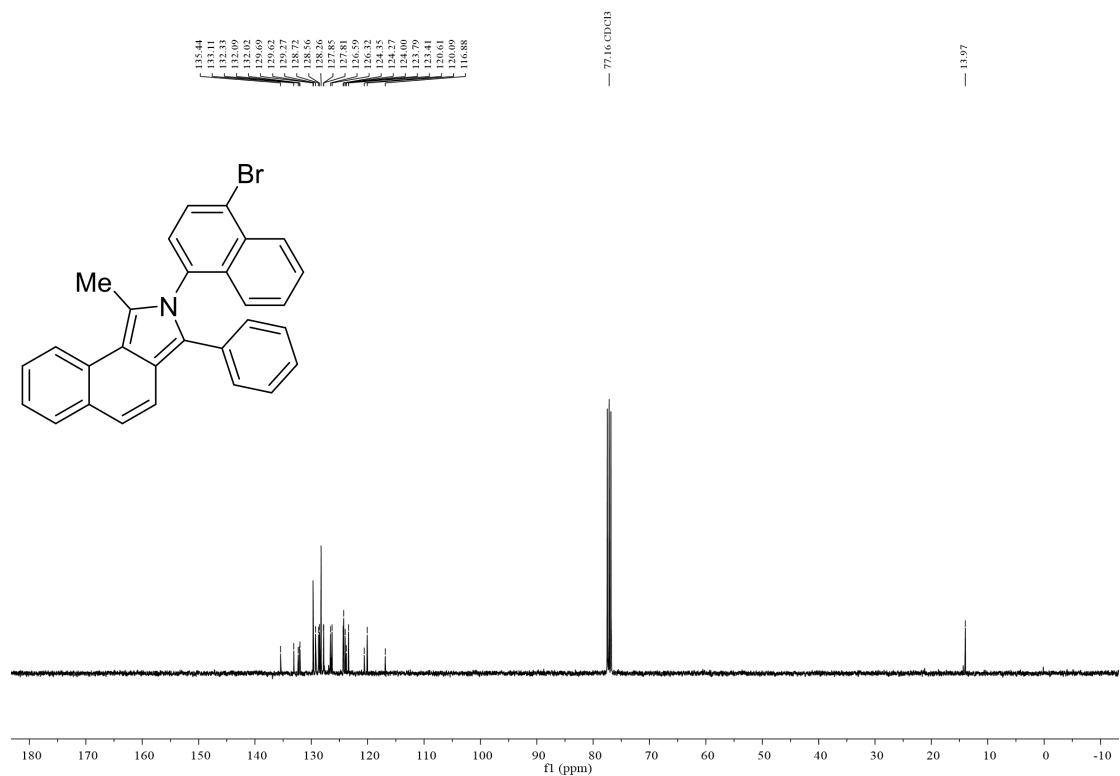

### <sup>1</sup>H NMR-3u (400 MHz, CDCl<sub>3</sub>)

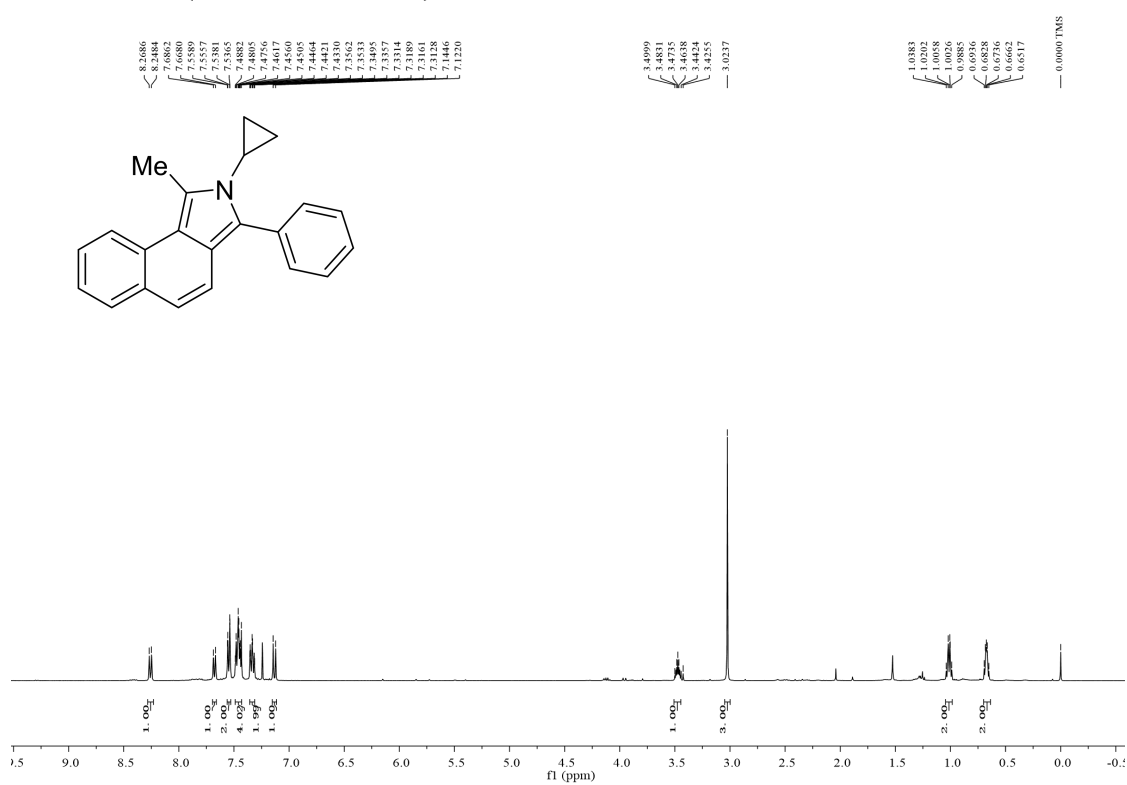

### <sup>13</sup>C NMR-3u (100 MHz, CDCl<sub>3</sub>)

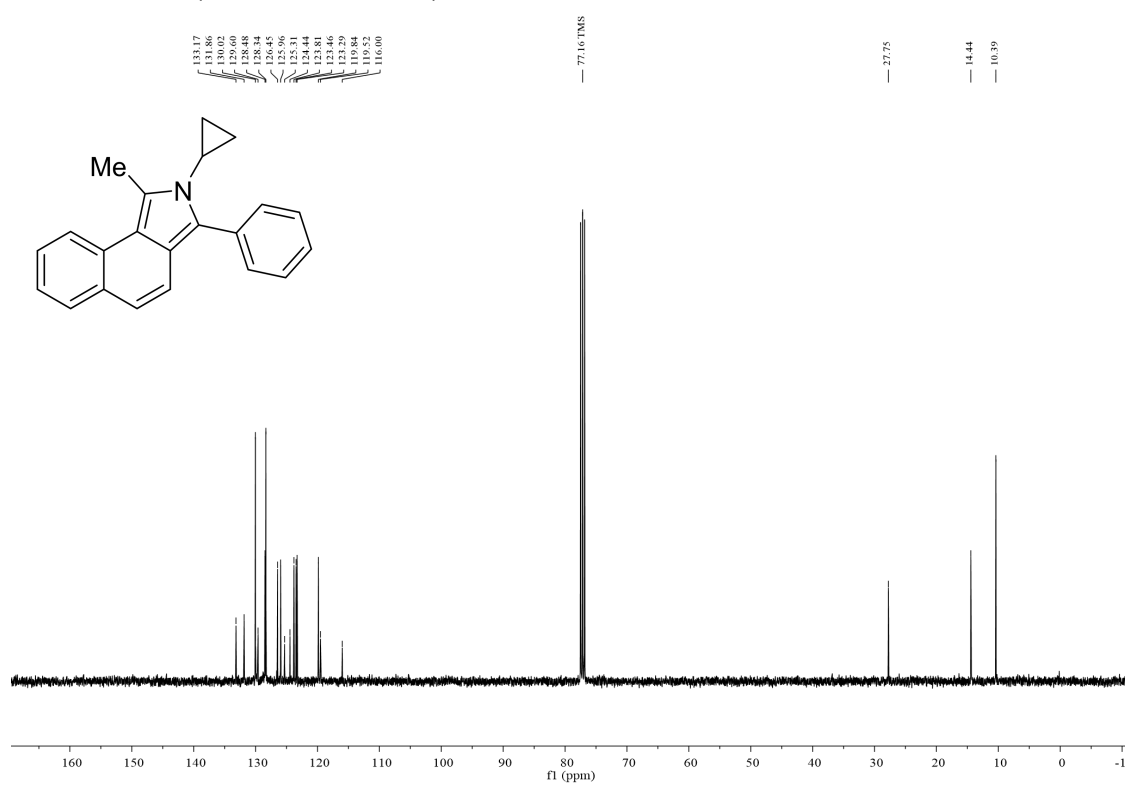

### <sup>1</sup>H NMR-3v (400 MHz, CDCl<sub>3</sub>)

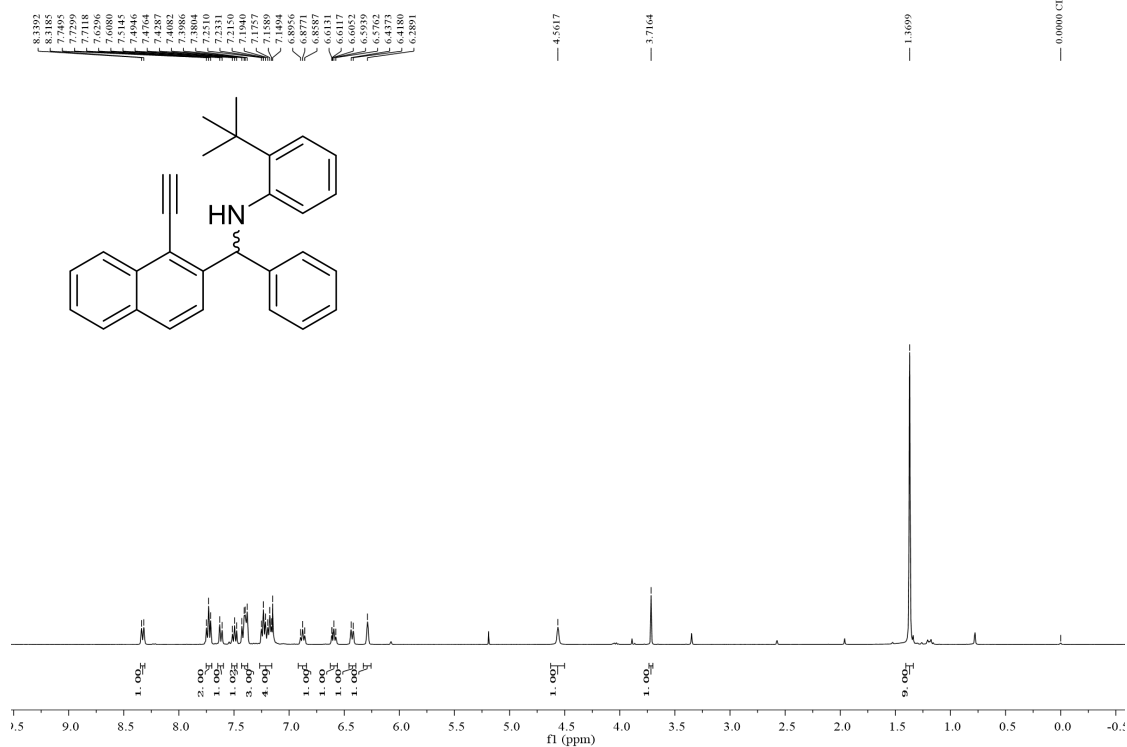

### <sup>13</sup>C NMR-3v (100 MHz, CDCl<sub>3</sub>)

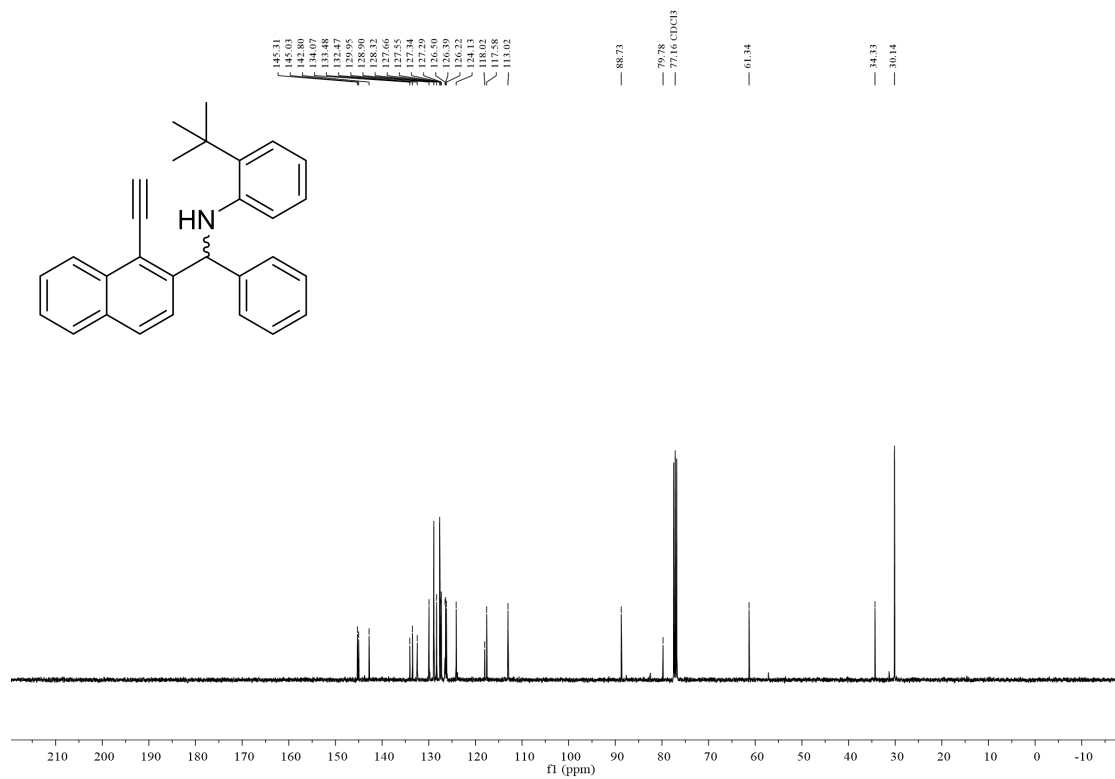

# <sup>1</sup>H NMR-3w (400 MHz, CDCl<sub>3</sub>)

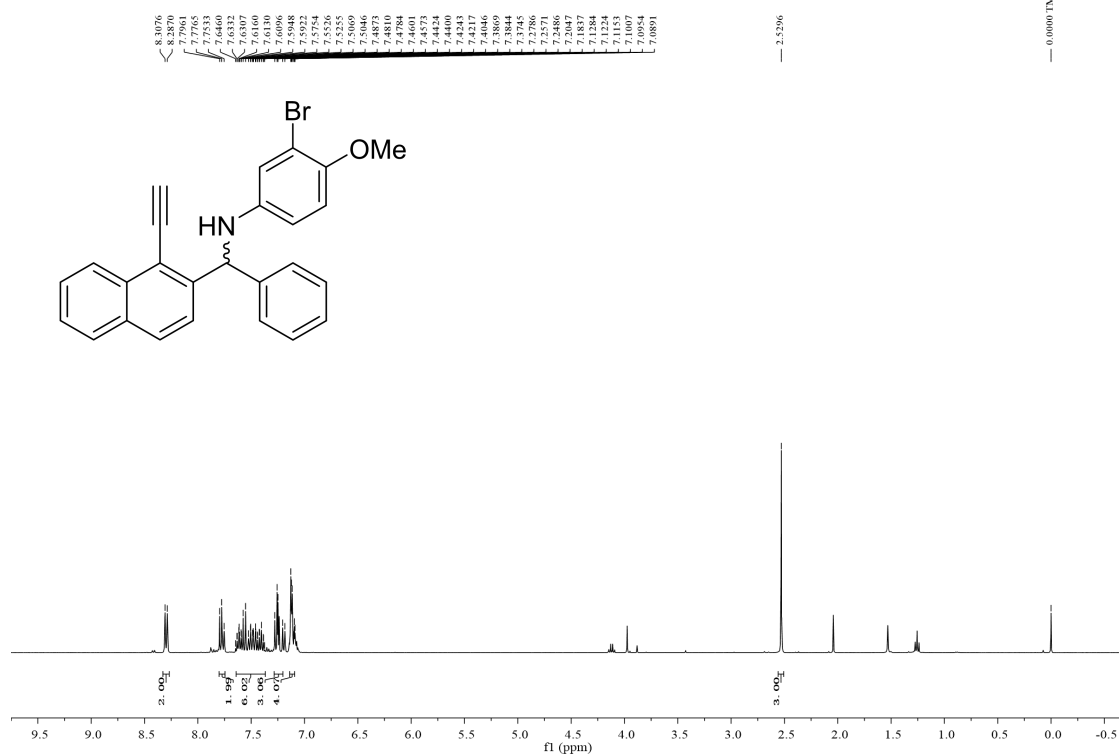

# <sup>13</sup>C NMR-3w (100 MHz, CDCl<sub>3</sub>)

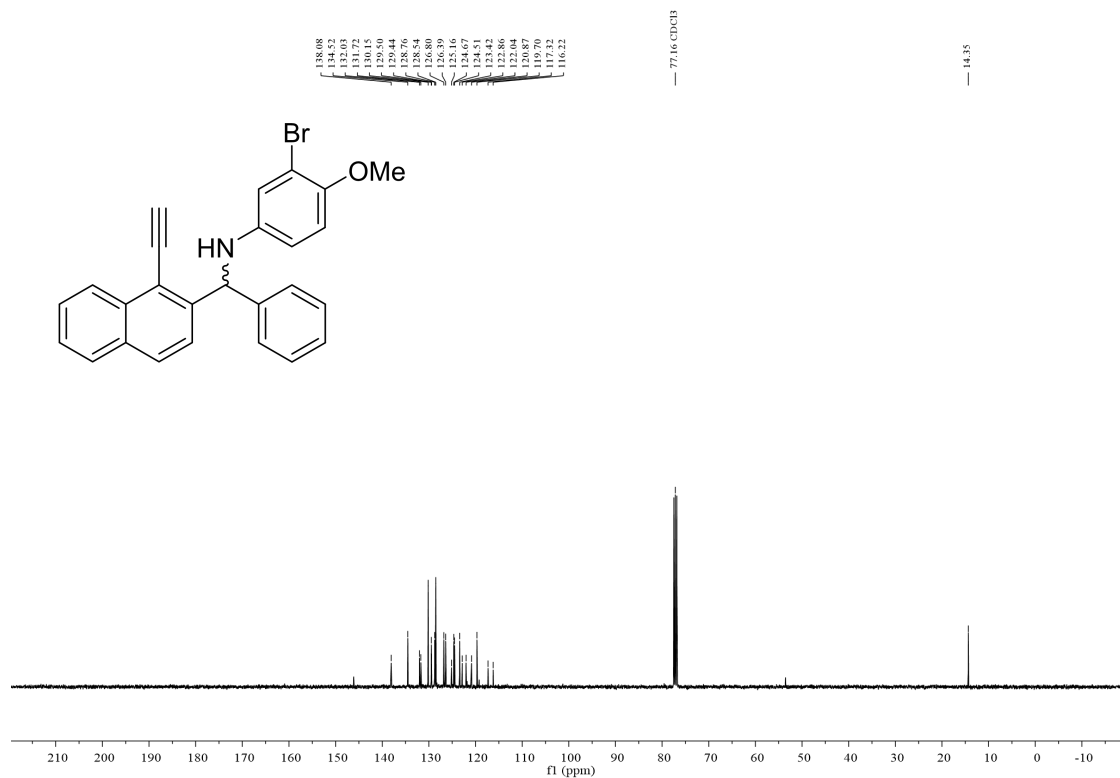

# <sup>1</sup>H NMR-3x (400 MHz, CDCl<sub>3</sub>)

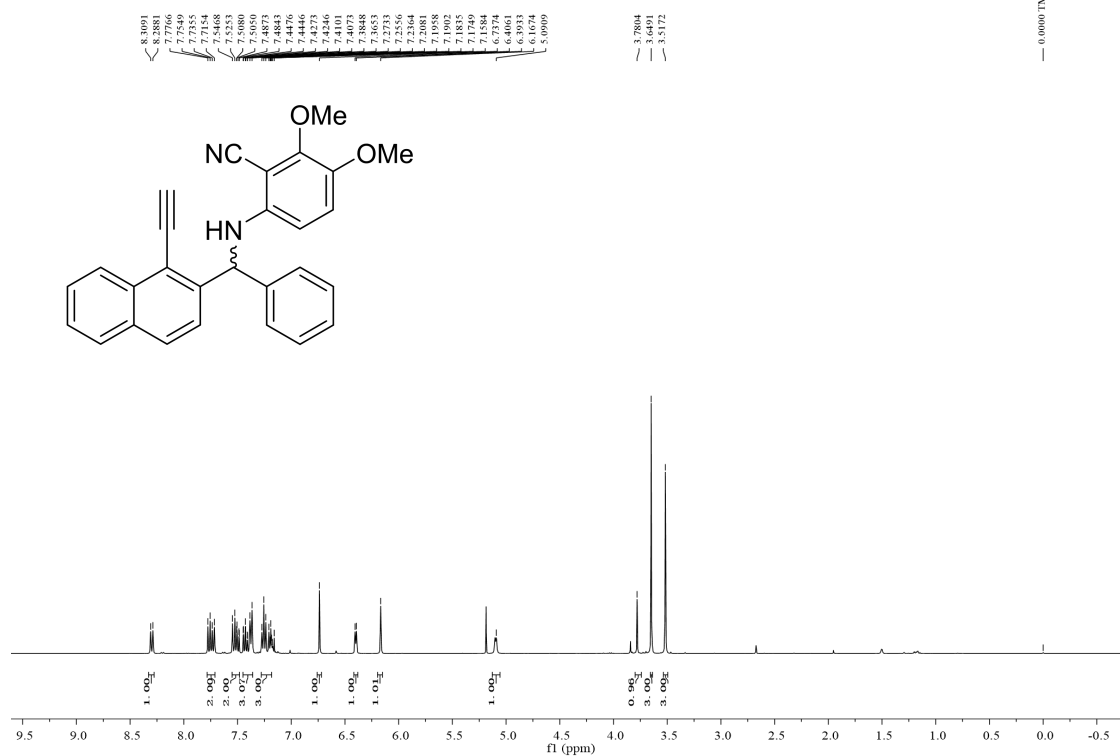

# <sup>13</sup>C NMR-3x (100 MHz, CDCl<sub>3</sub>)

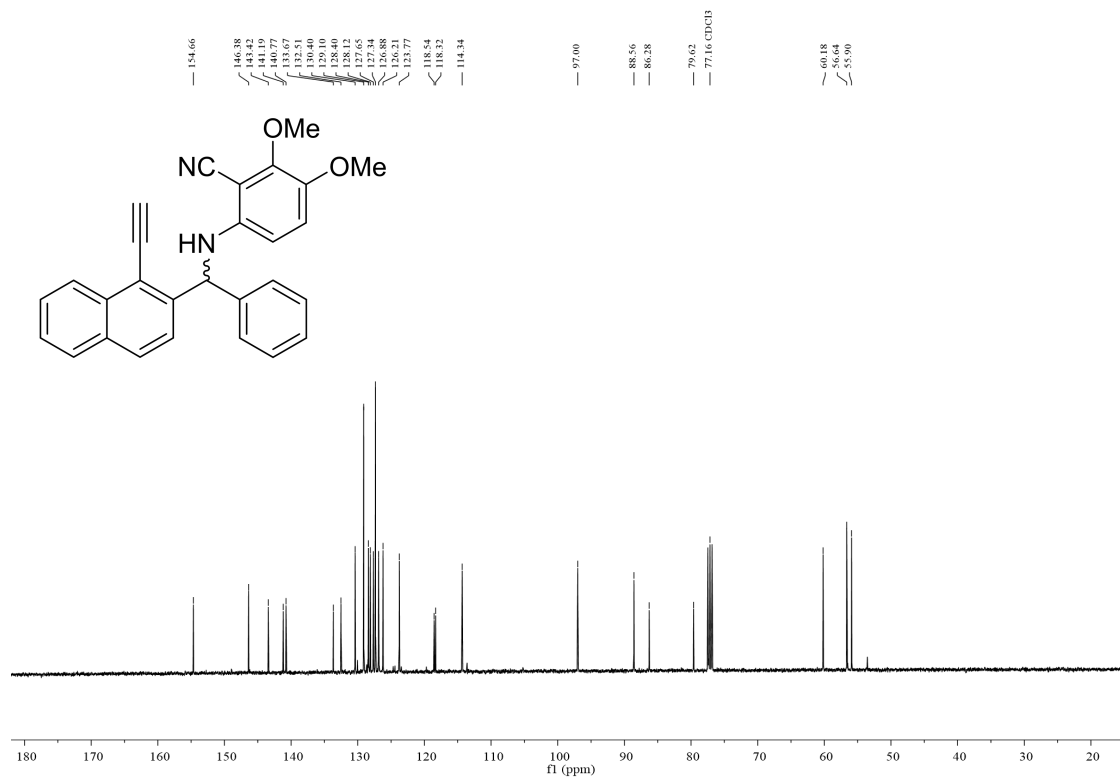



# <sup>1</sup>H NMR-4a (400 MHz, CDCl<sub>3</sub>)

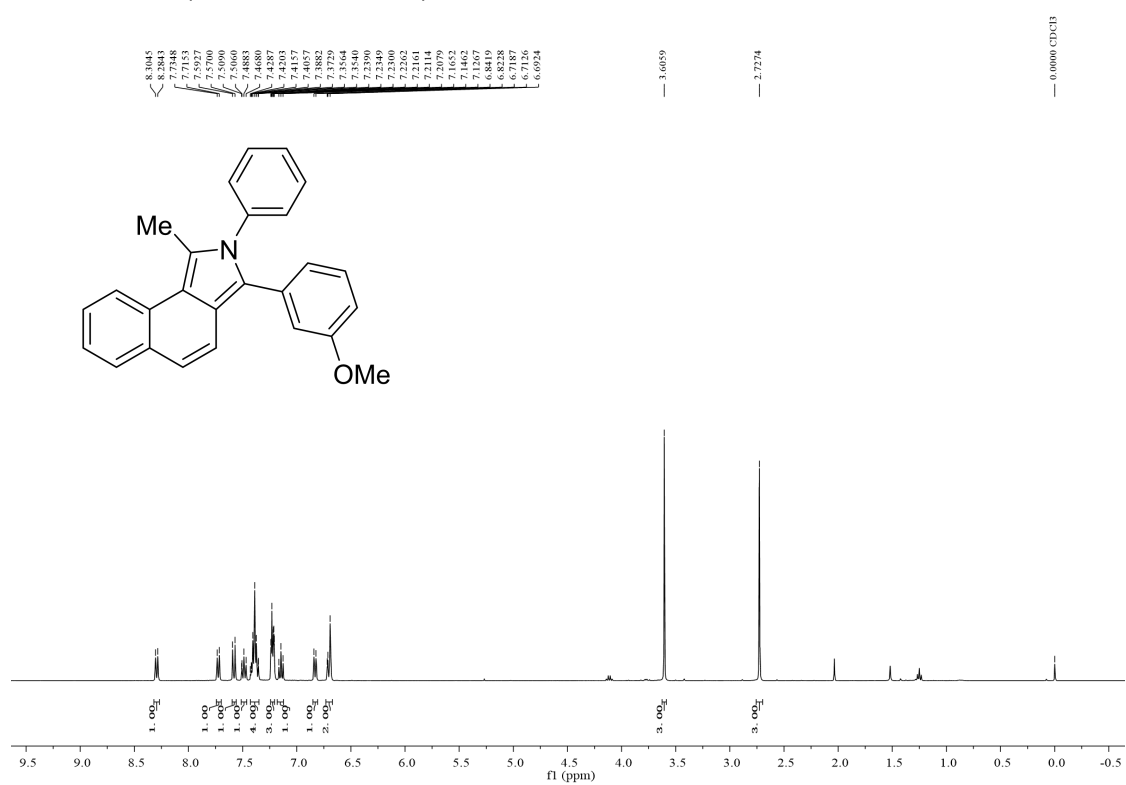

# <sup>13</sup>C NMR-4a (100 MHz, CDCl<sub>3</sub>)

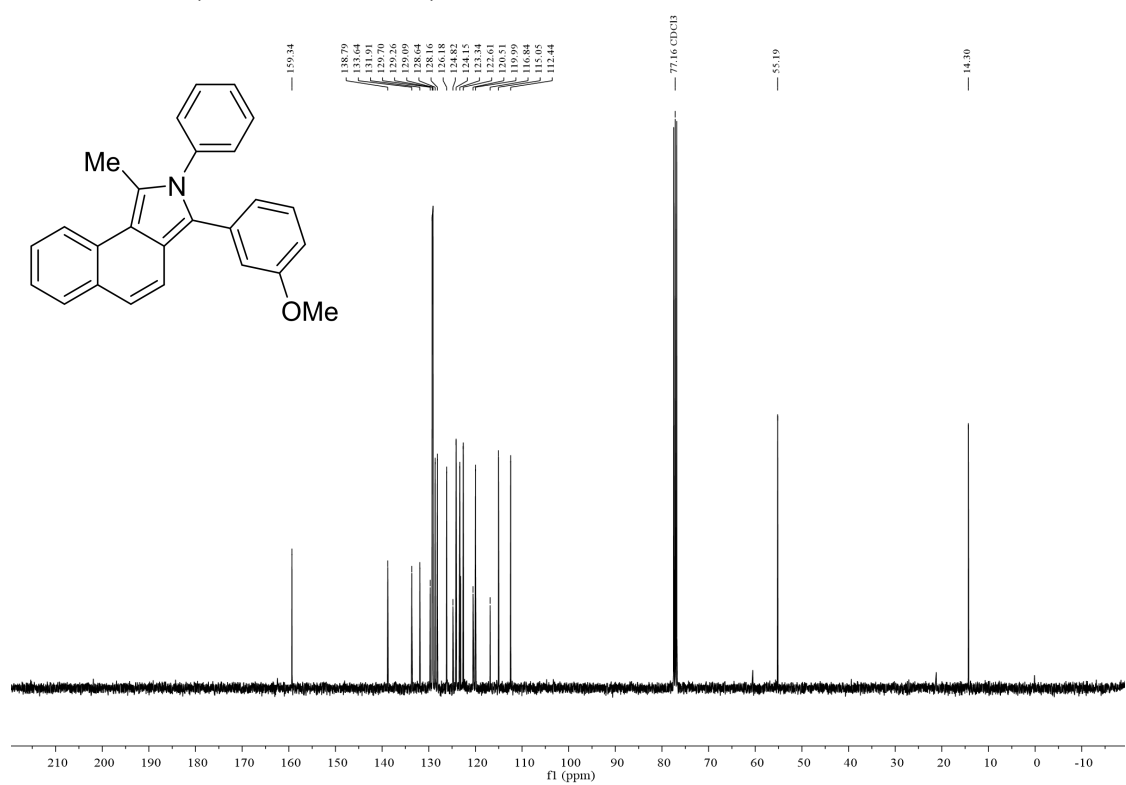

### <sup>1</sup>H NMR-4b (400 MHz, CDCl<sub>3</sub>)

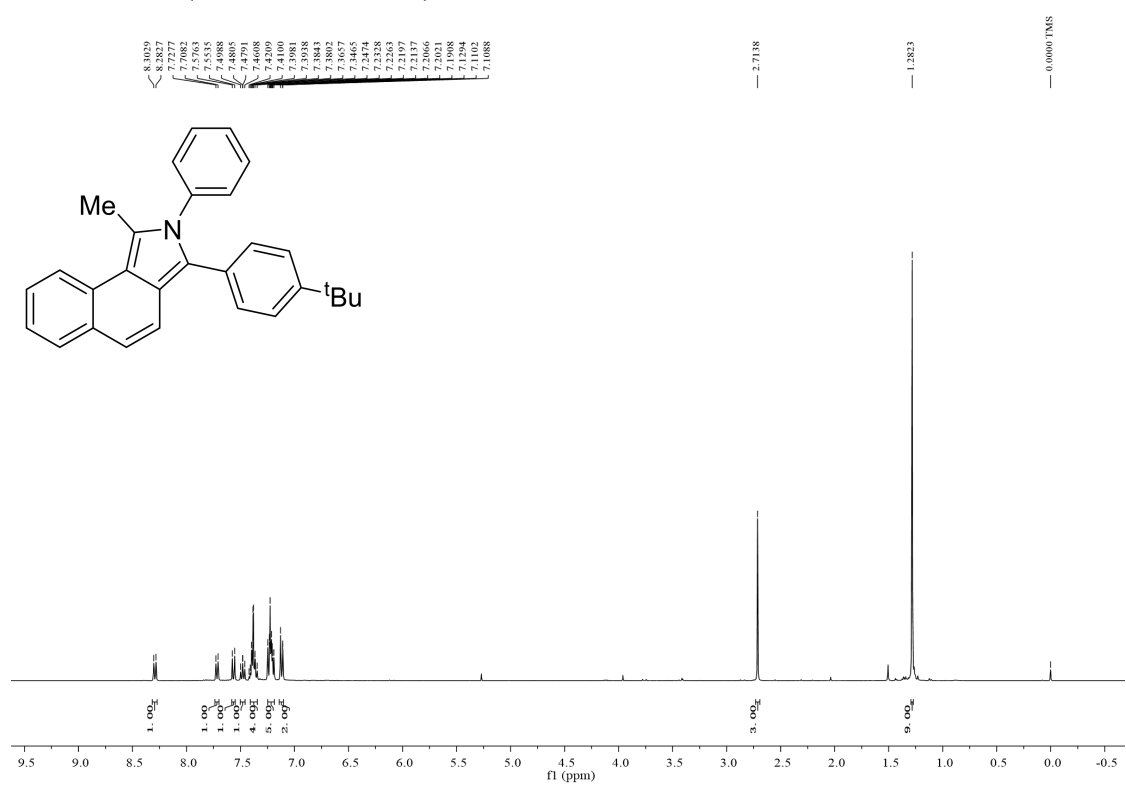

### <sup>13</sup>C NMR-4b (100 MHz, CDCl<sub>3</sub>)

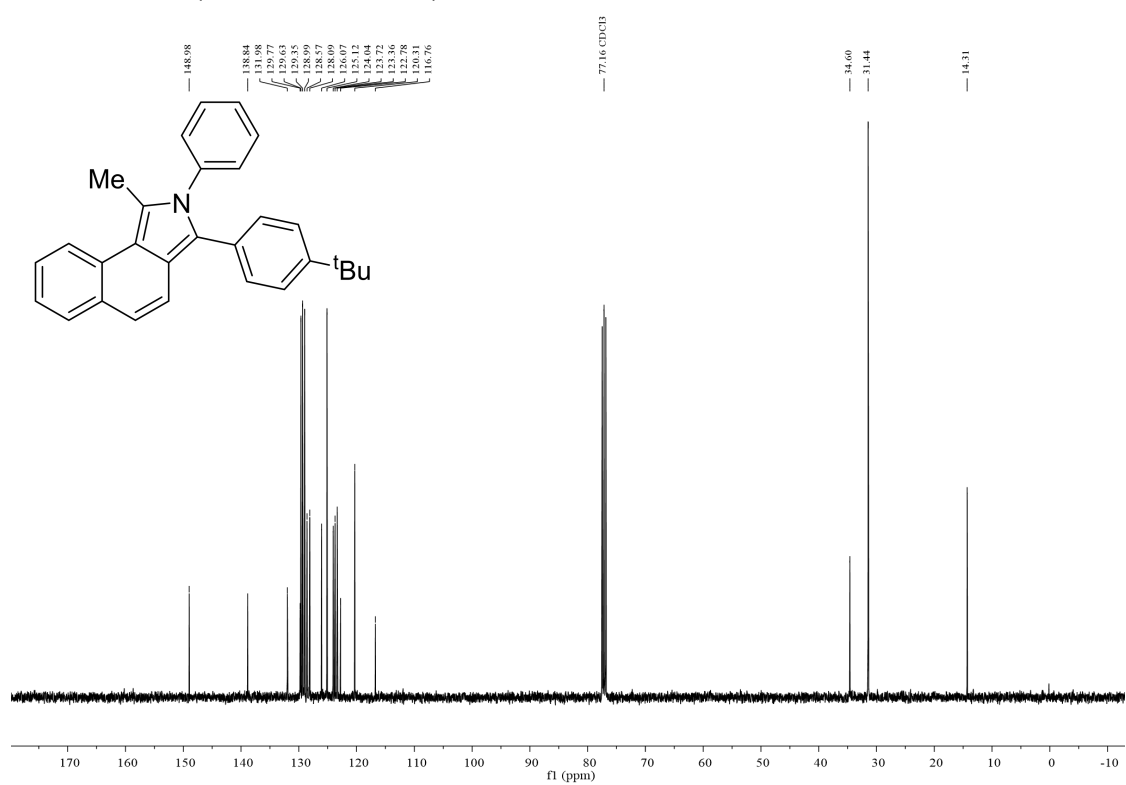



# <sup>1</sup>H NMR-4d (400 MHz, CDCl<sub>3</sub>)

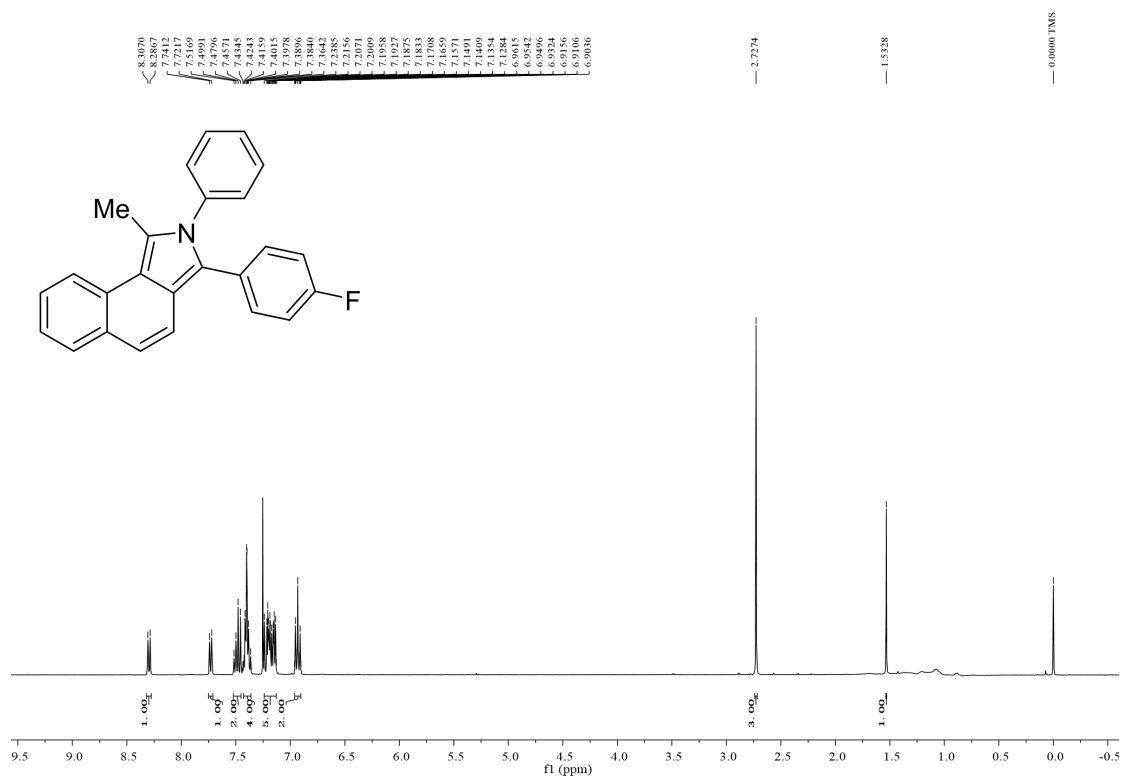

# <sup>13</sup>C NMR-4d (100 MHz, CDCl<sub>3</sub>)

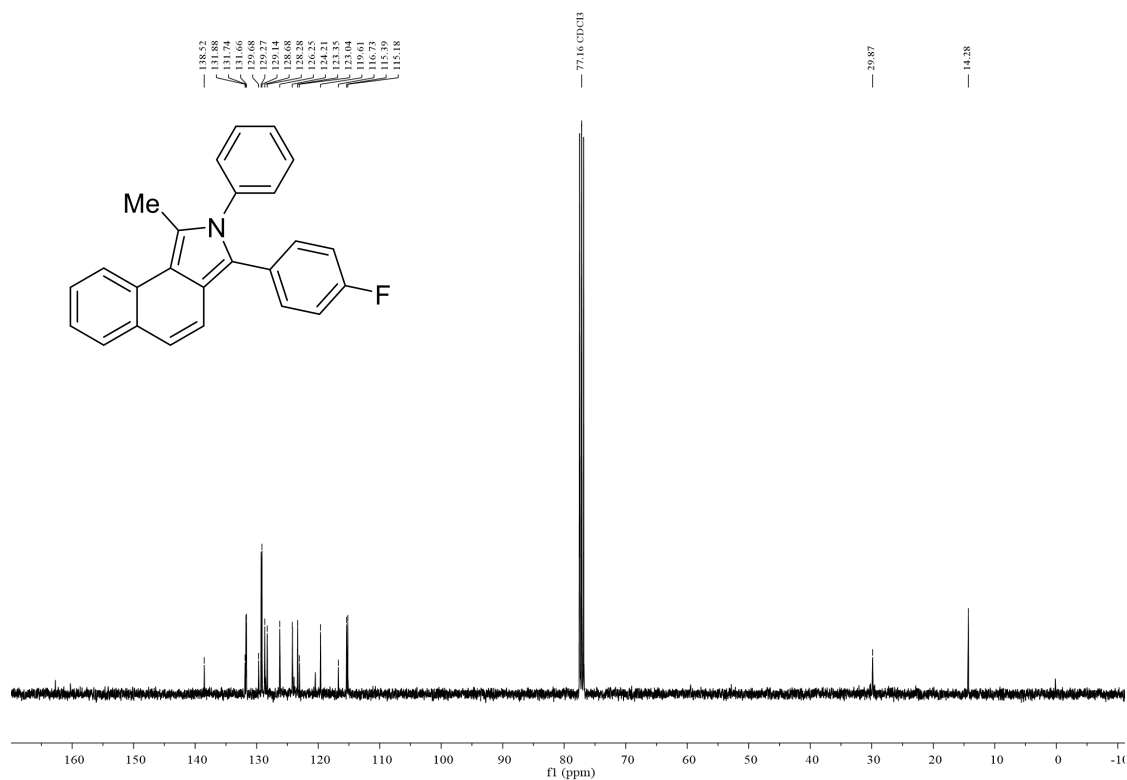

**<sup>19</sup>F NMR-4d (376 MHz, CDCl<sub>3</sub>)**

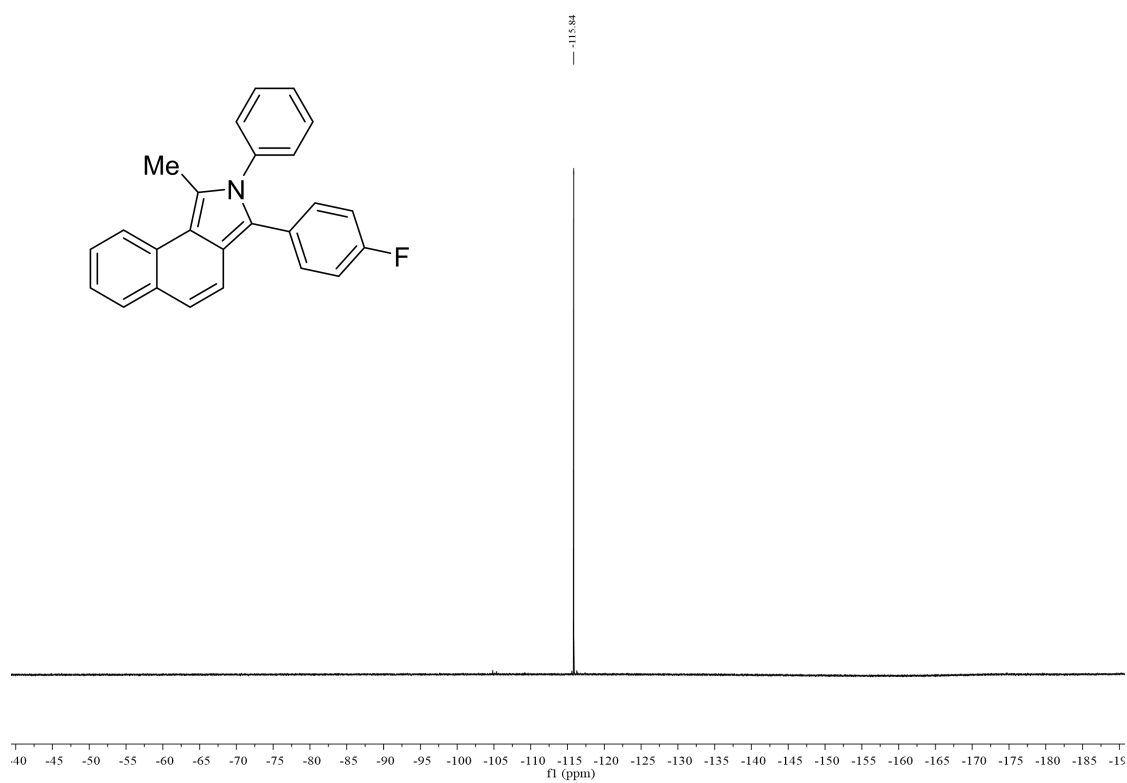

### <sup>1</sup>H NMR-4e (400 MHz, CDCl<sub>3</sub>)

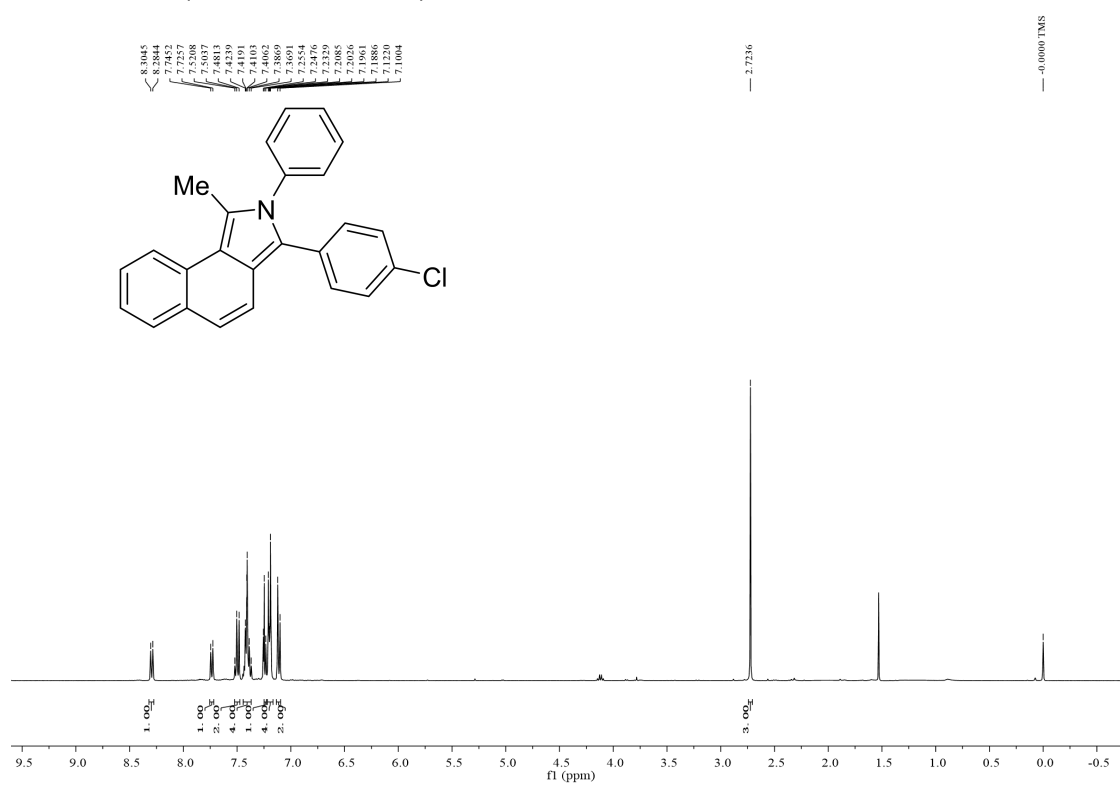

### <sup>13</sup>C NMR-4e (100 MHz, CDCl<sub>3</sub>)

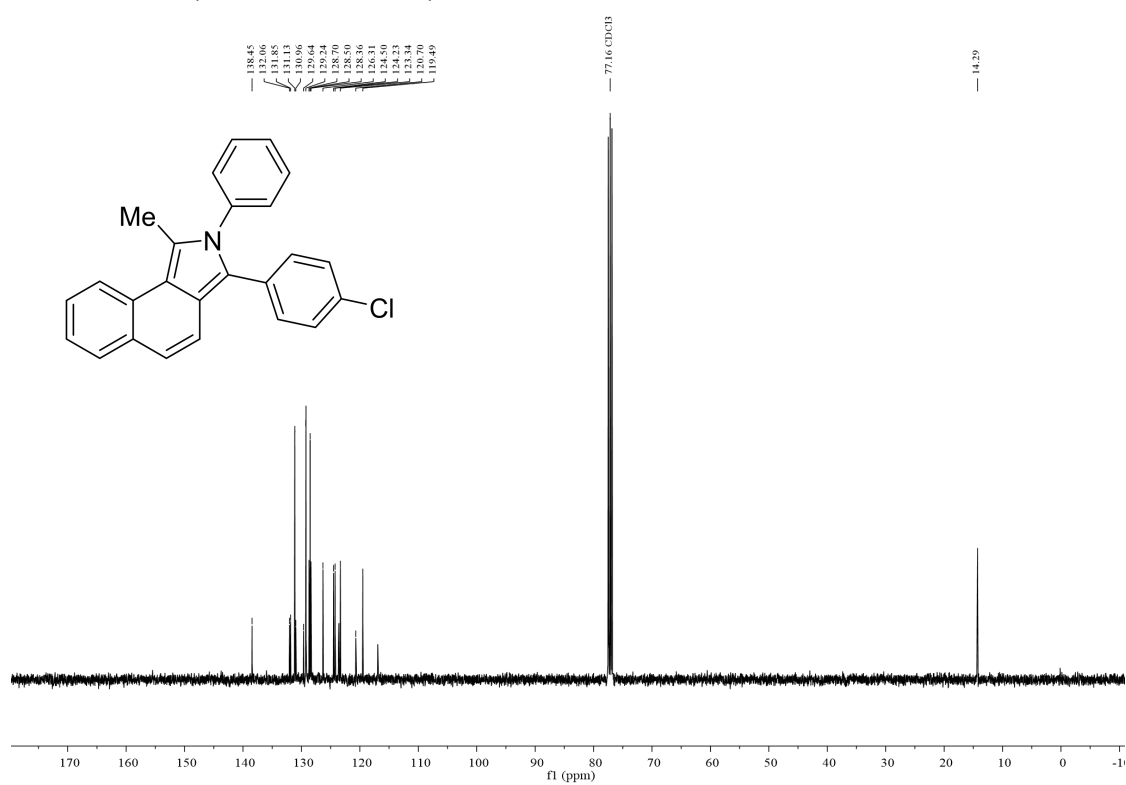

### <sup>1</sup>H NMR-5a (400 MHz, CDCl<sub>3</sub>)

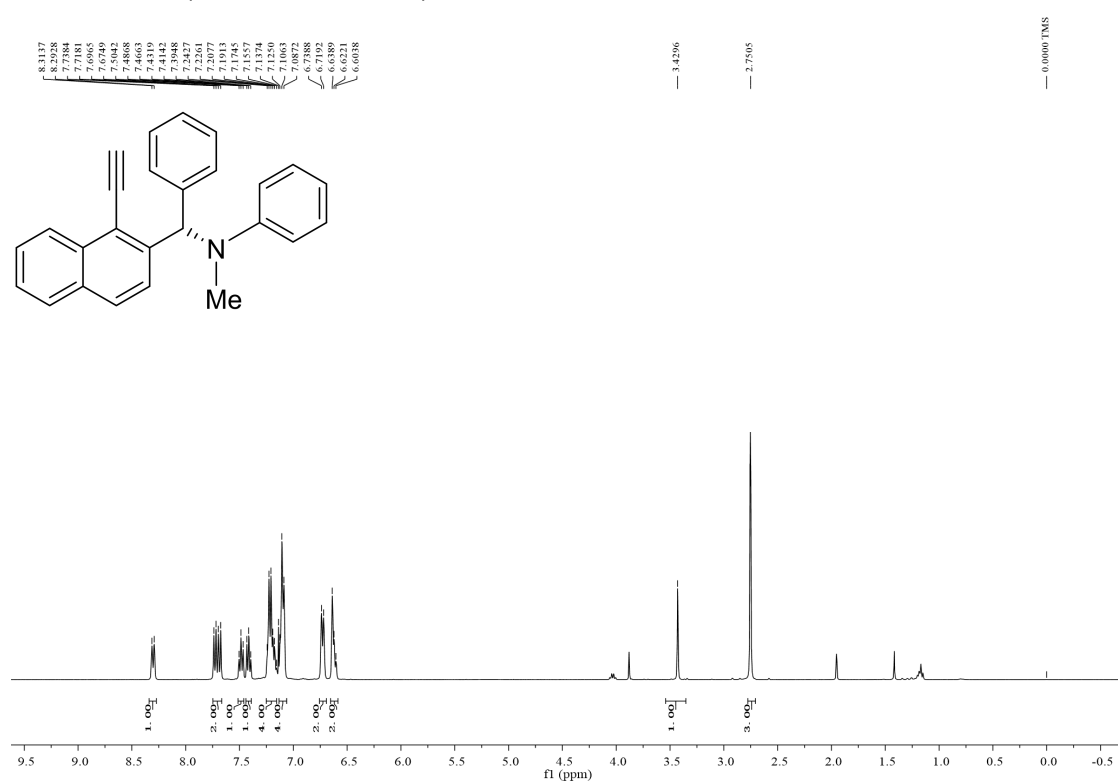

### <sup>13</sup>C NMR-5a (100 MHz, CDCl<sub>3</sub>)

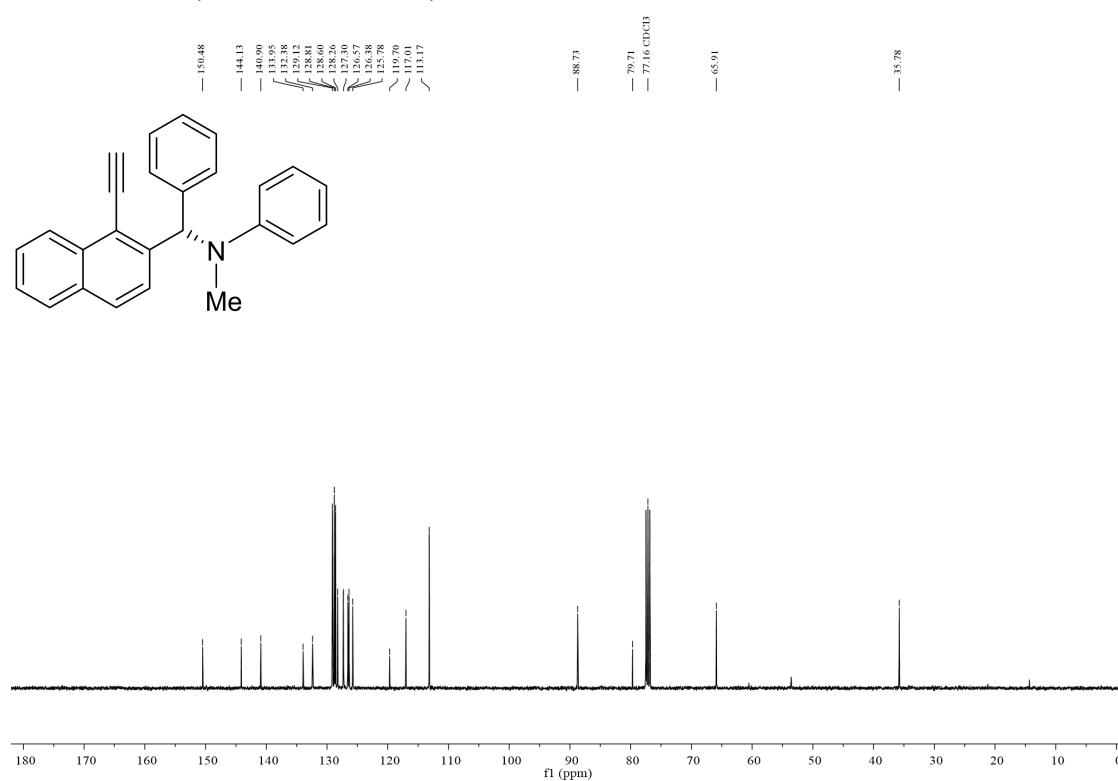

### <sup>1</sup>H NMR-5b (400 MHz, CDCl<sub>3</sub>)

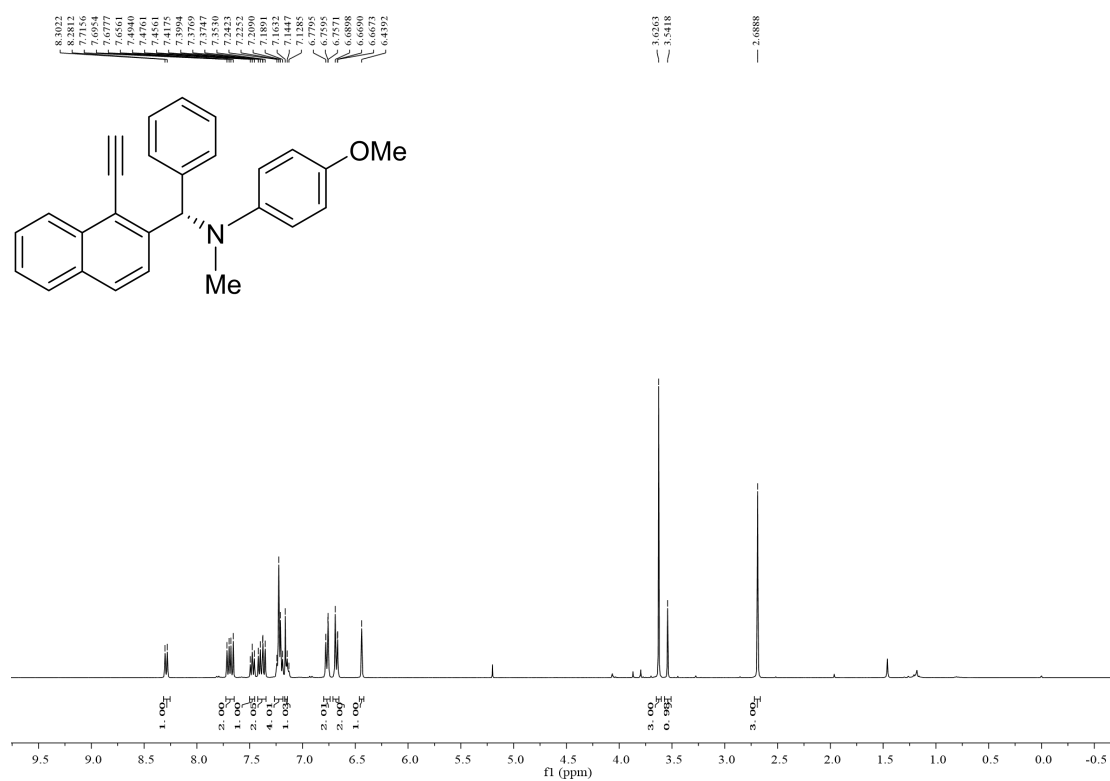

### <sup>13</sup>C NMR-5b (100 MHz, CDCl<sub>3</sub>)

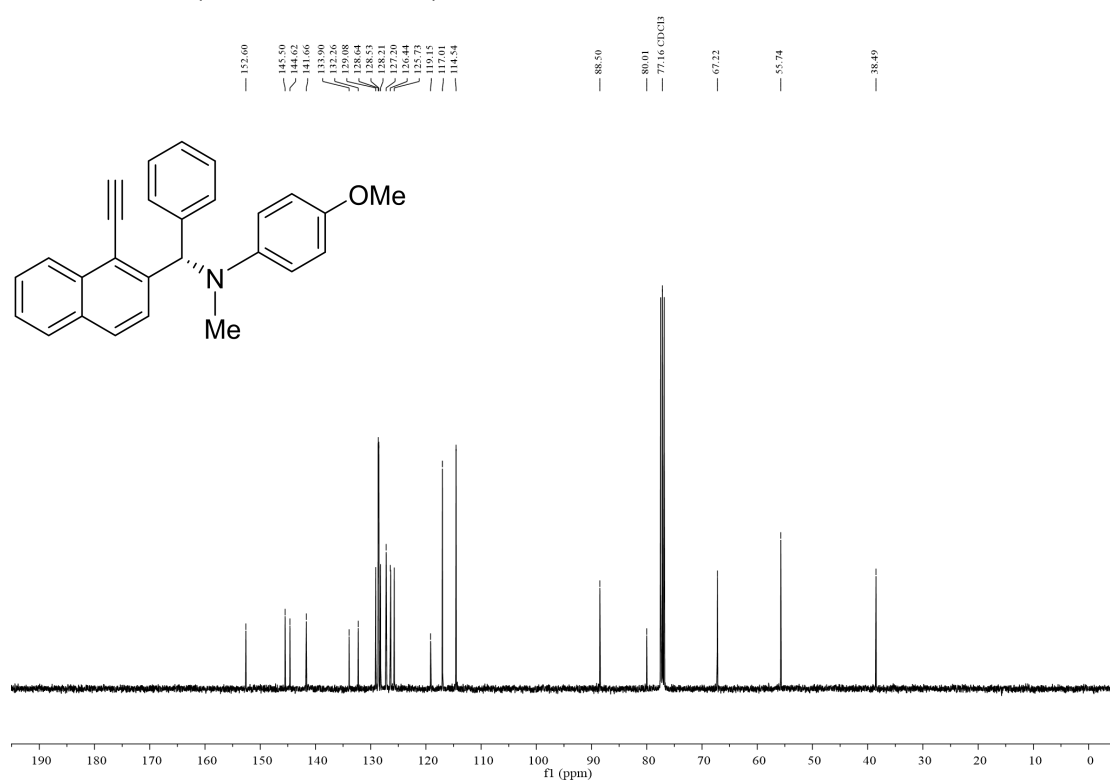



### <sup>1</sup>H NMR-5d (400 MHz, CDCl<sub>3</sub>)

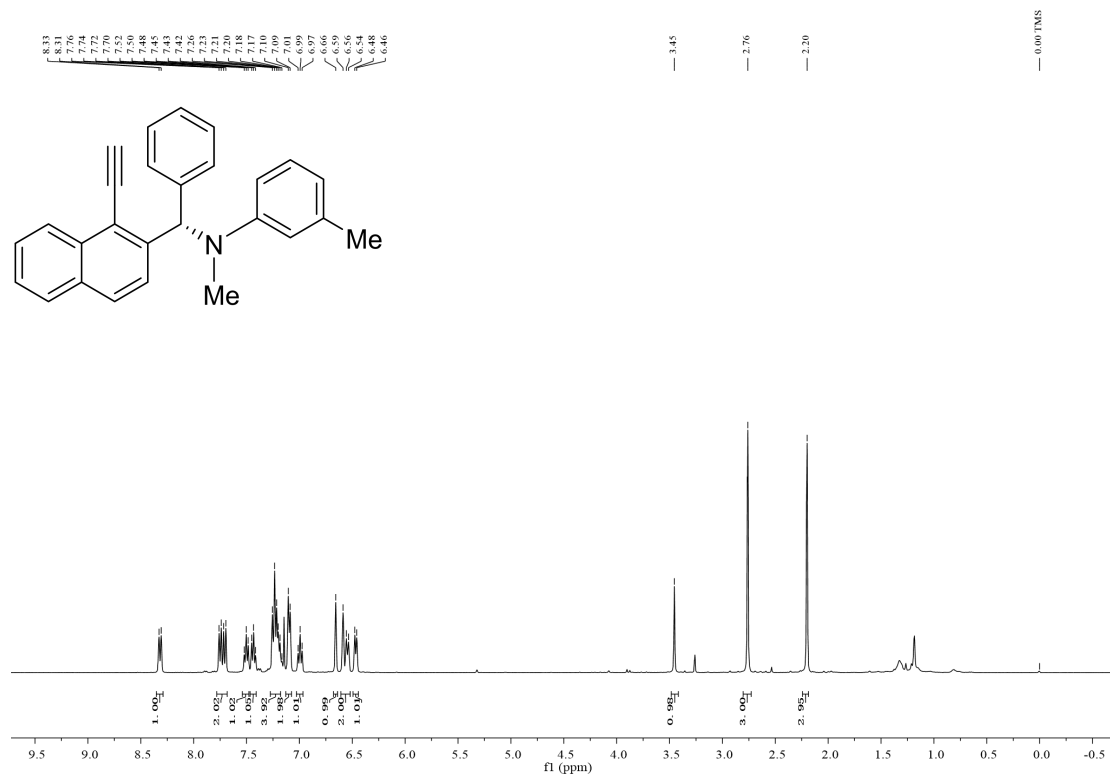

### <sup>13</sup>C NMR-5d (100 MHz, CDCl<sub>3</sub>)

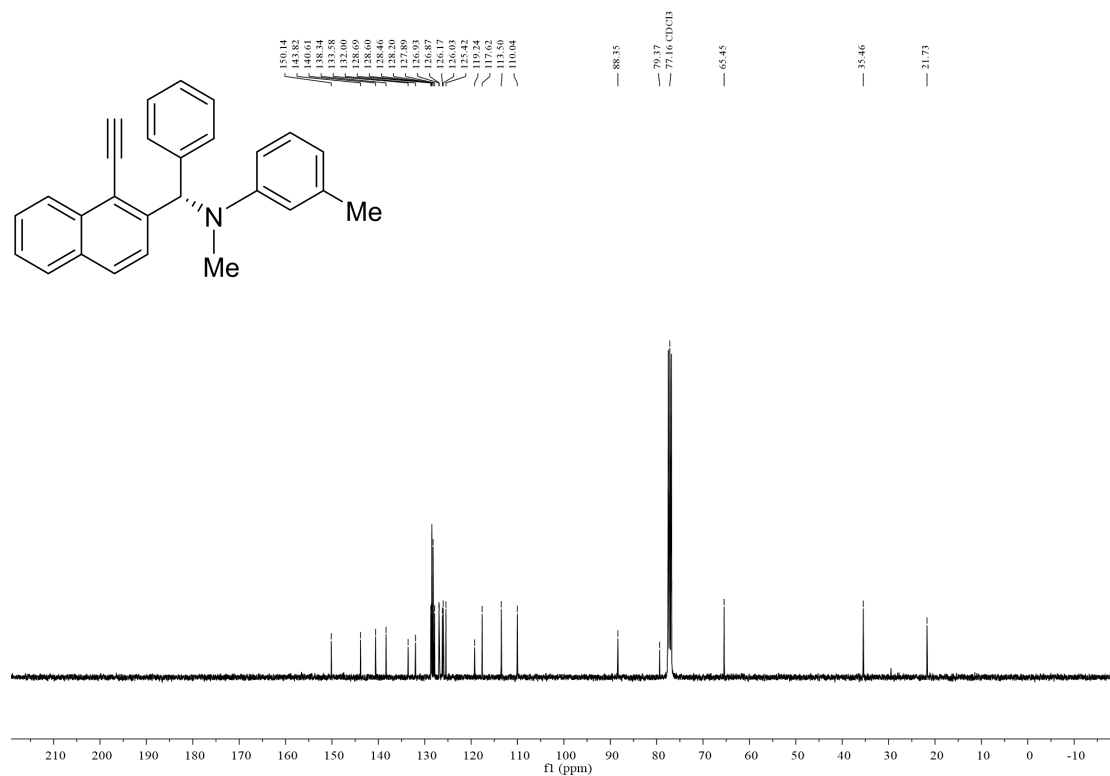

### <sup>1</sup>H NMR-5e (400 MHz, CDCl<sub>3</sub>)

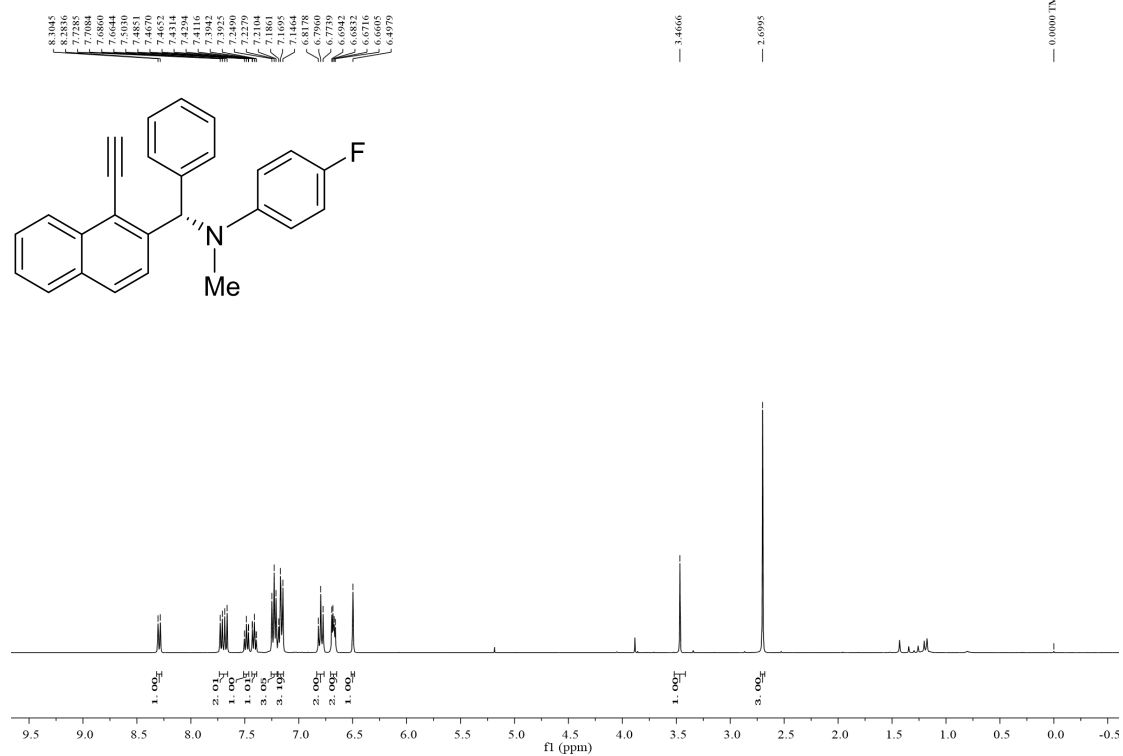

### <sup>13</sup>C NMR-5e (100 MHz, CDCl<sub>3</sub>)

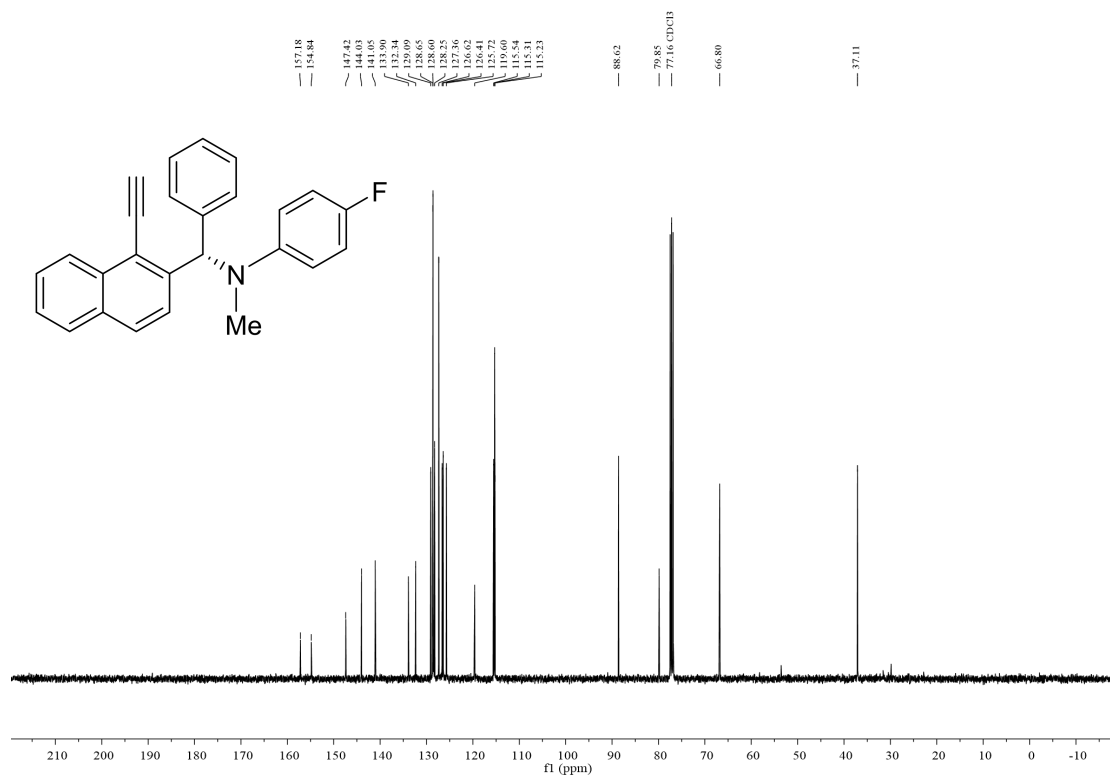

**<sup>19</sup>F NMR-5e (376 MHz, CDCl<sub>3</sub>)**

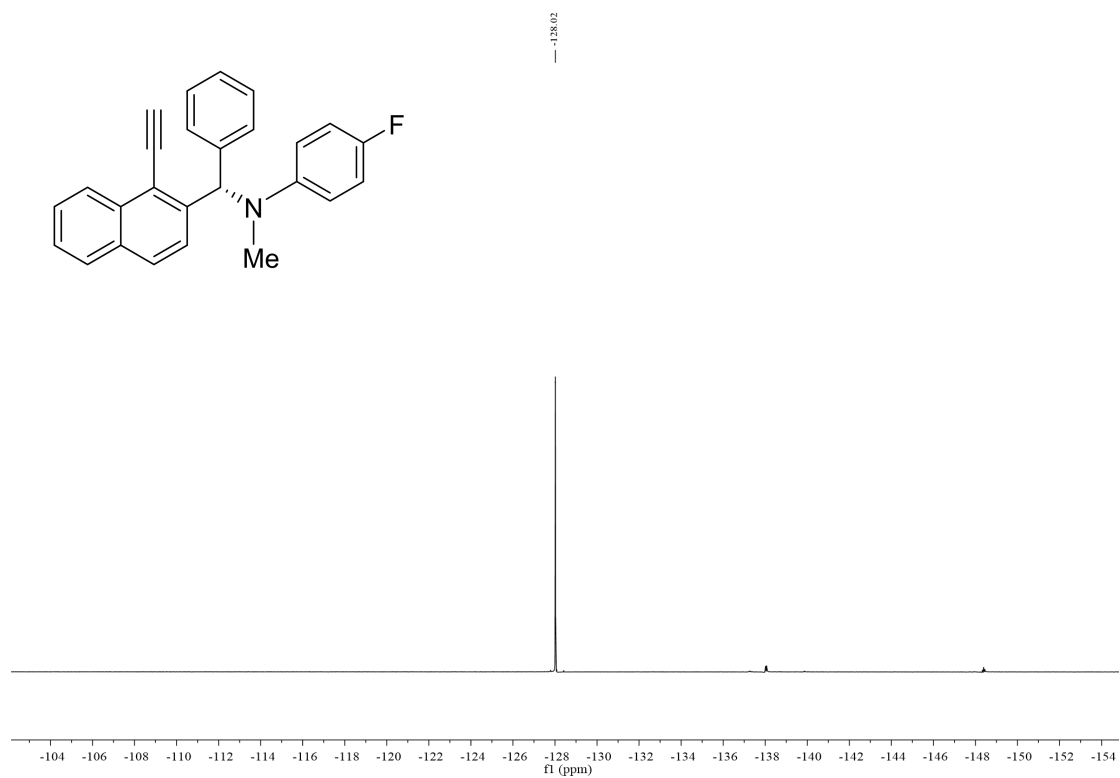

# <sup>1</sup>H NMR-5f (400 MHz, CDCl<sub>3</sub>)

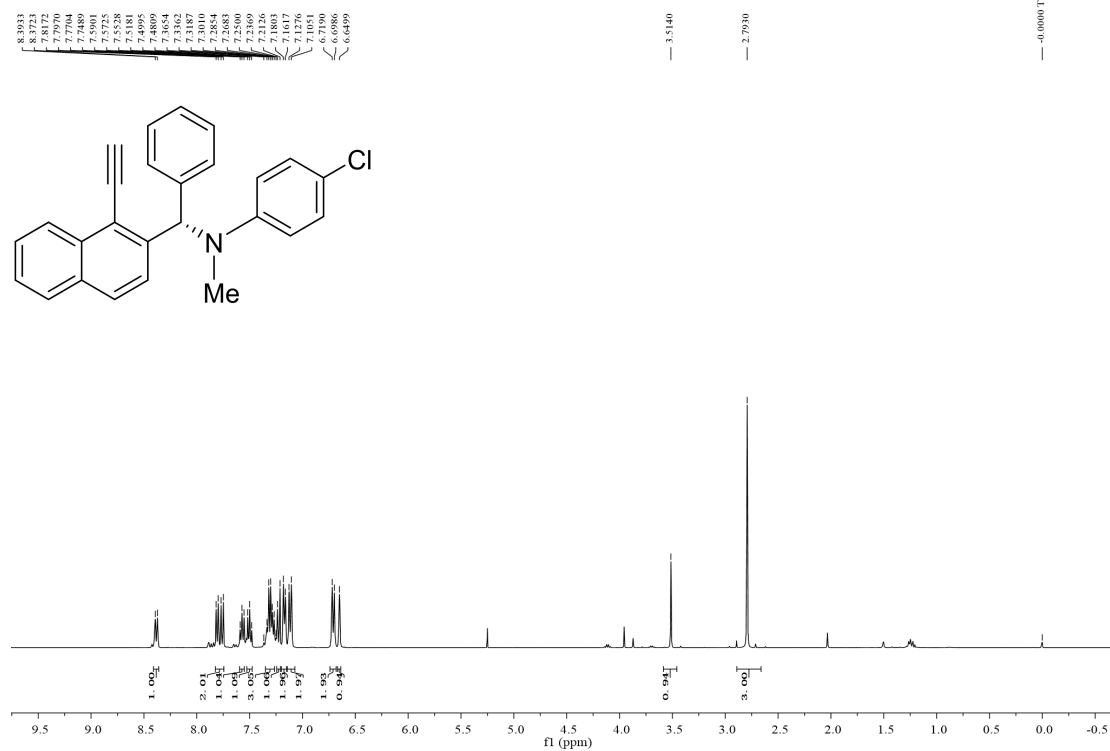

# <sup>13</sup>C NMR-5f (100 MHz, CDCl<sub>3</sub>)

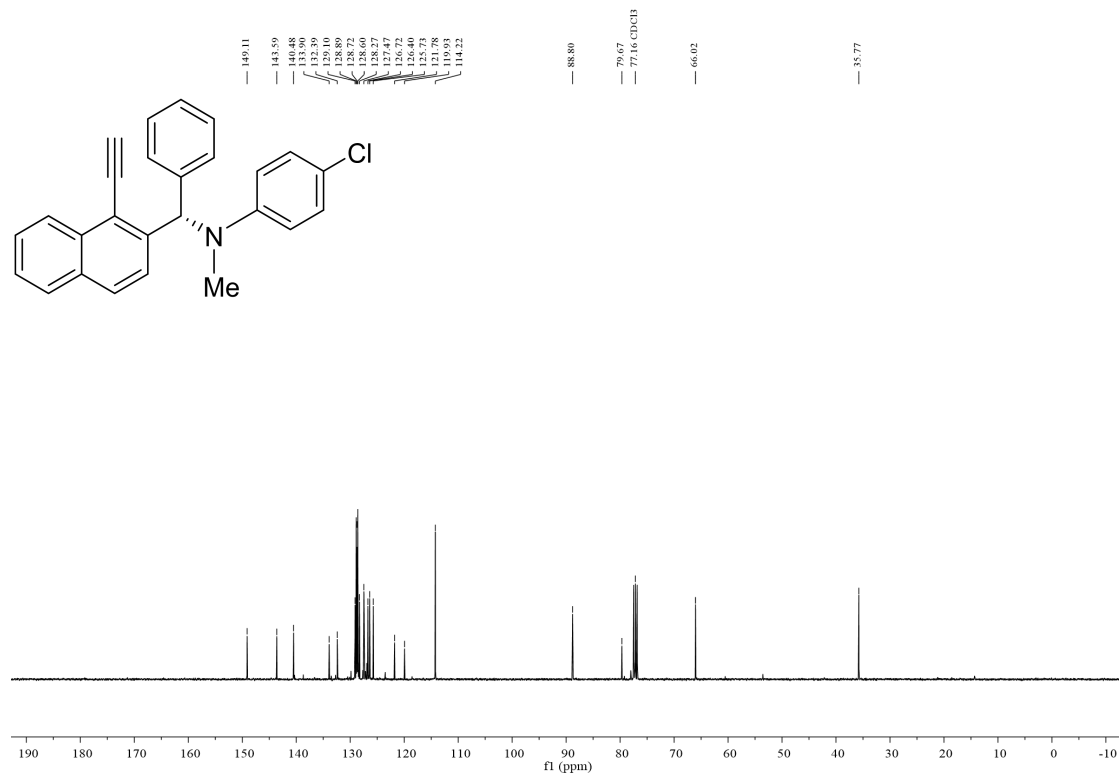

# <sup>1</sup>H NMR-5g (400 MHz, CDCl<sub>3</sub>)

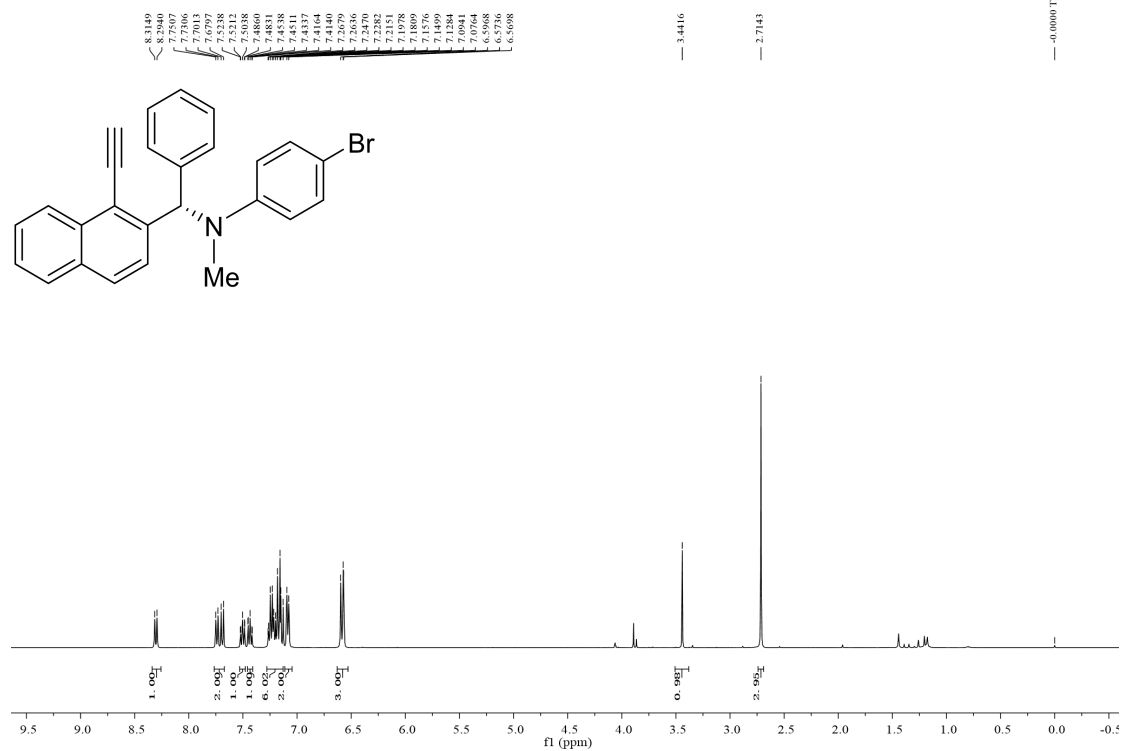

# <sup>13</sup>C NMR-5g (100 MHz, CDCl<sub>3</sub>)

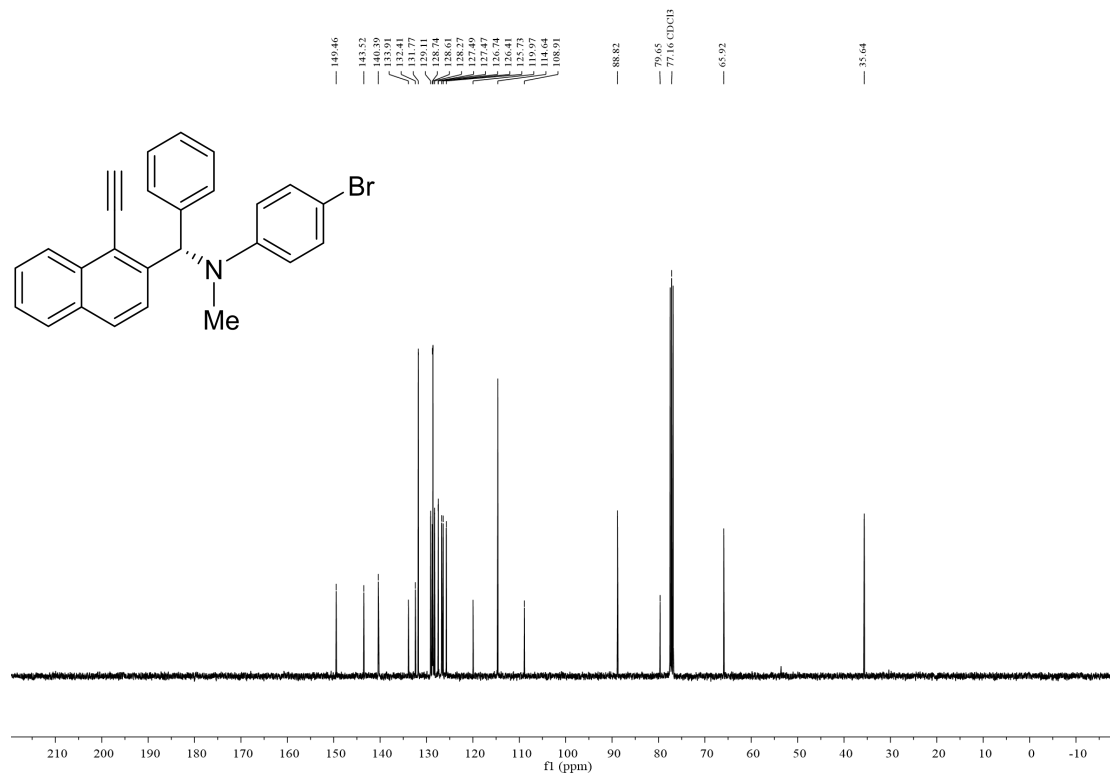

### <sup>1</sup>H NMR-5h (400 MHz, CDCl<sub>3</sub>)

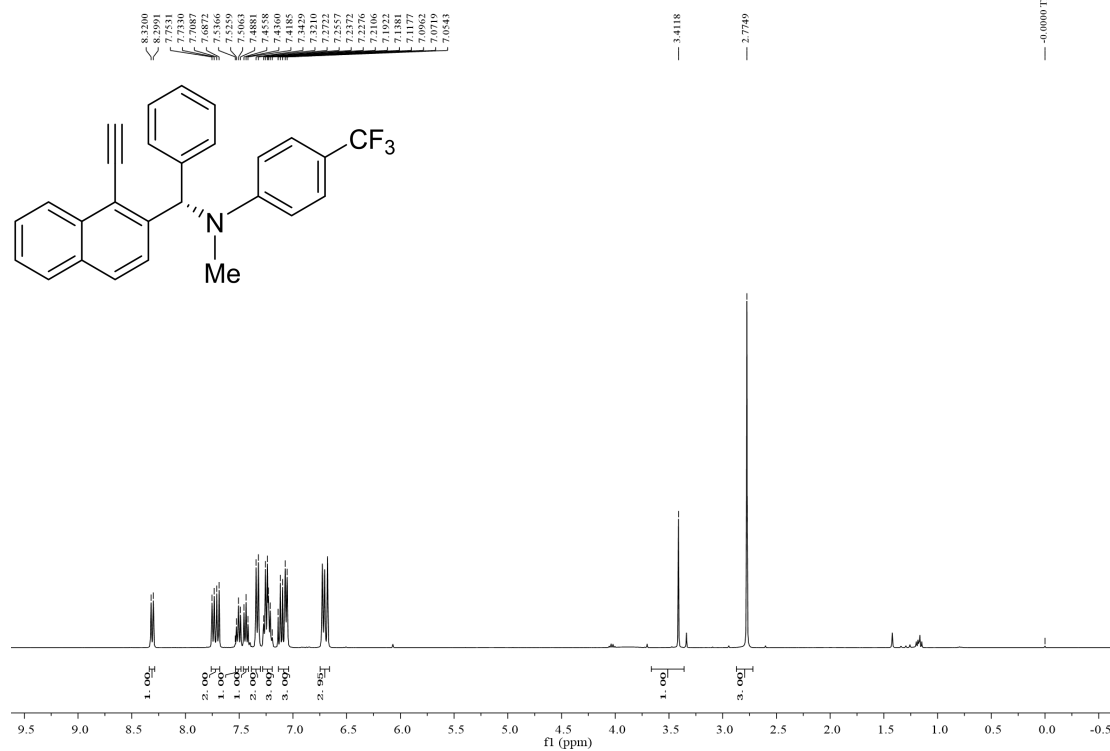

### <sup>13</sup>C NMR-5h (100 MHz, CDCl<sub>3</sub>)

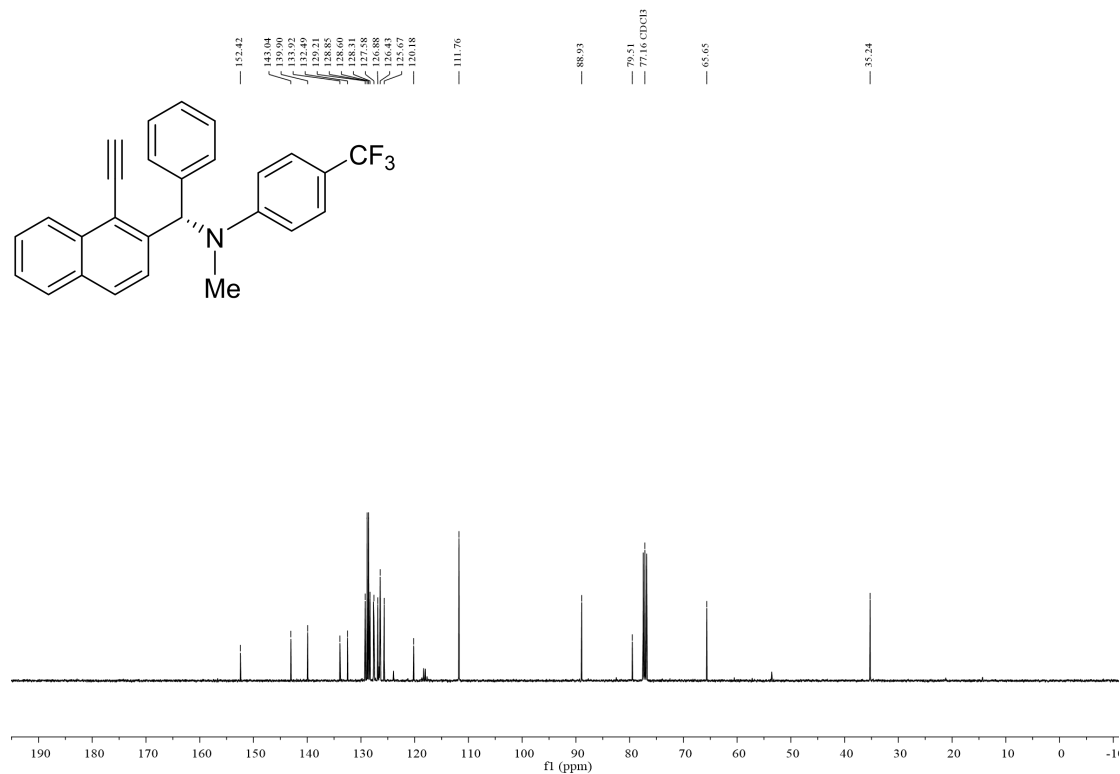

**<sup>19</sup>F NMR-5h (376 MHz, CDCl<sub>3</sub>)**

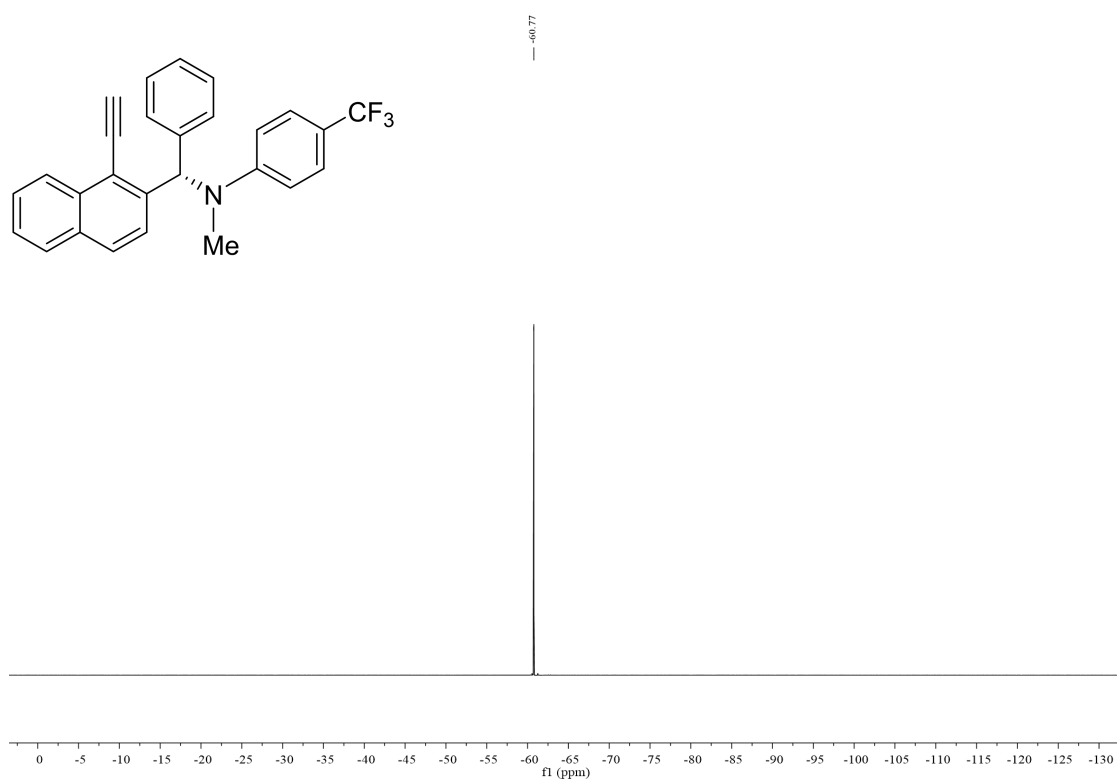

# <sup>1</sup>H NMR-5i (400 MHz, CDCl<sub>3</sub>)

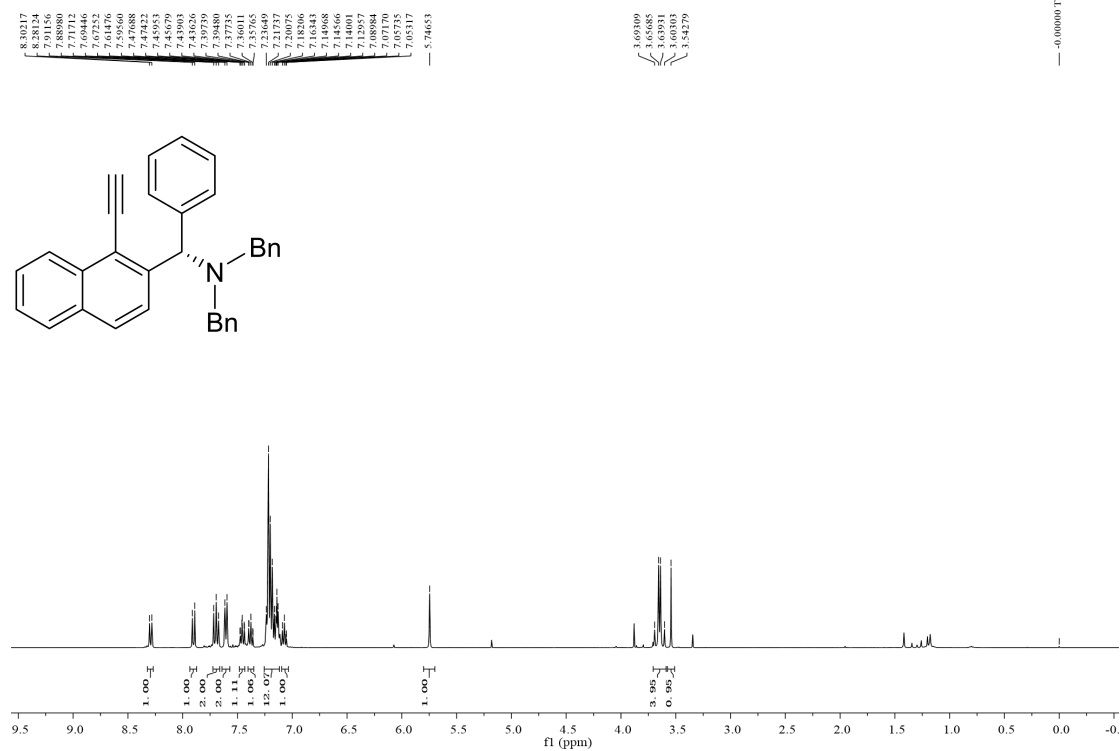

# <sup>13</sup>C NMR-5i (100 MHz, CDCl<sub>3</sub>)

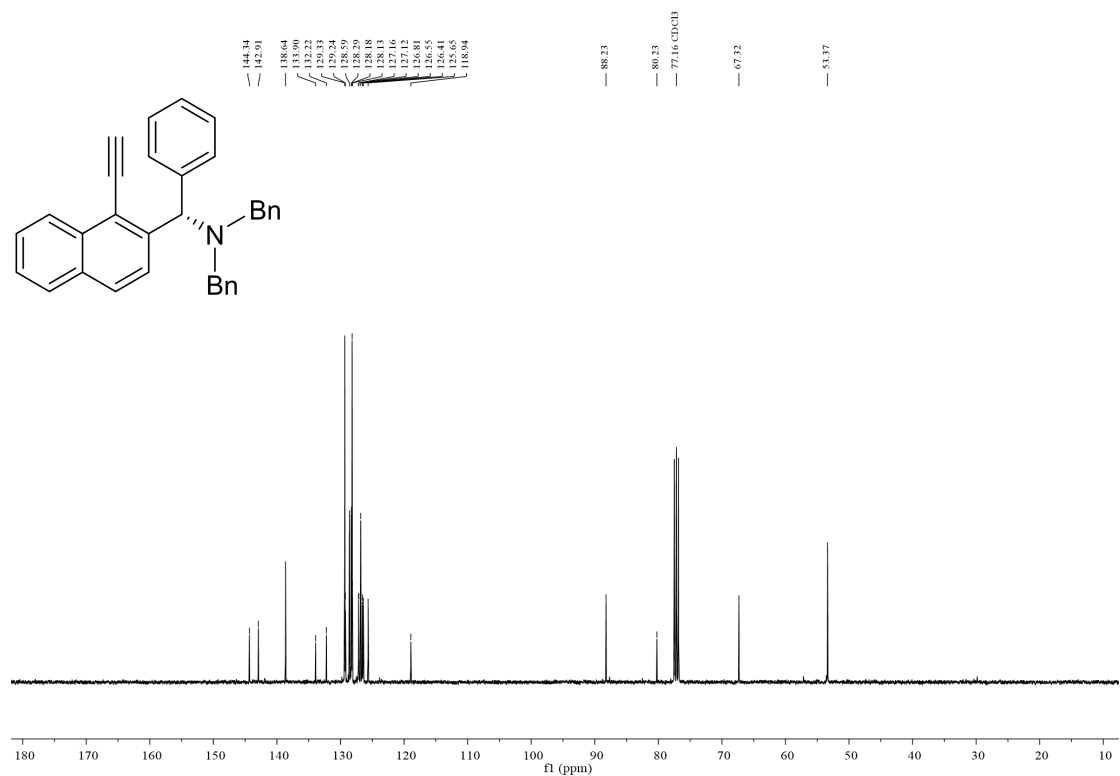

# <sup>1</sup>H NMR-5j (400 MHz, CDCl<sub>3</sub>)

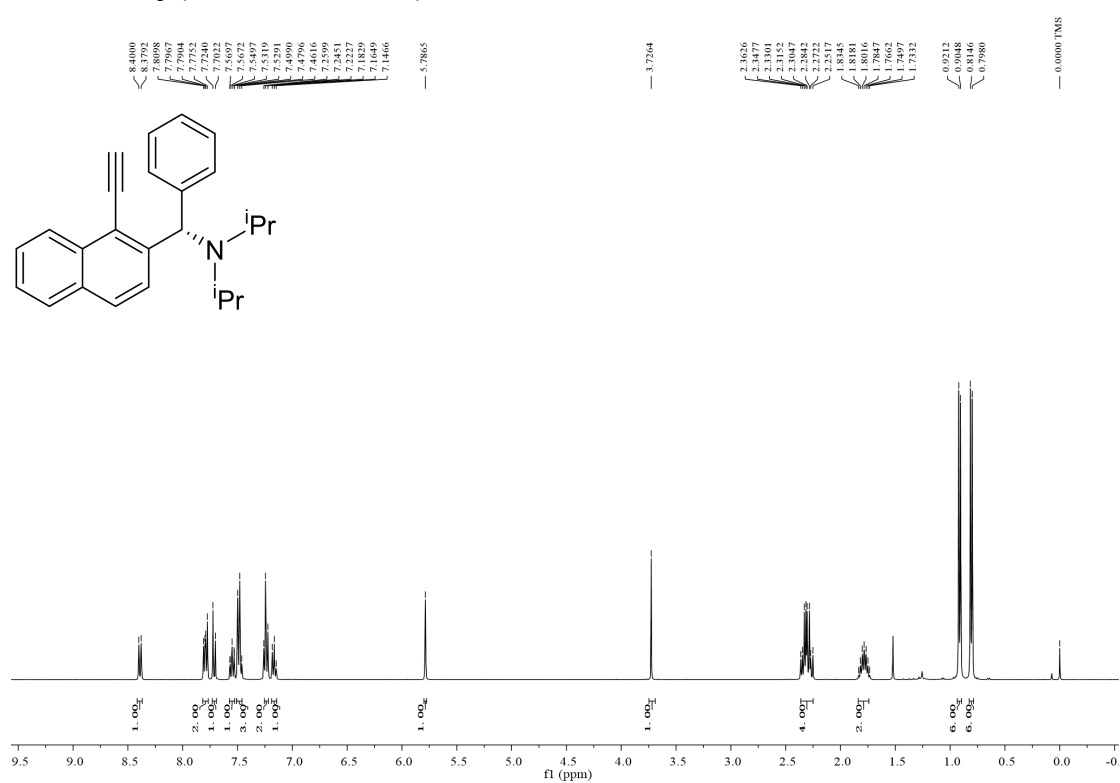

# <sup>13</sup>C NMR-5j (100 MHz, CDCl<sub>3</sub>)

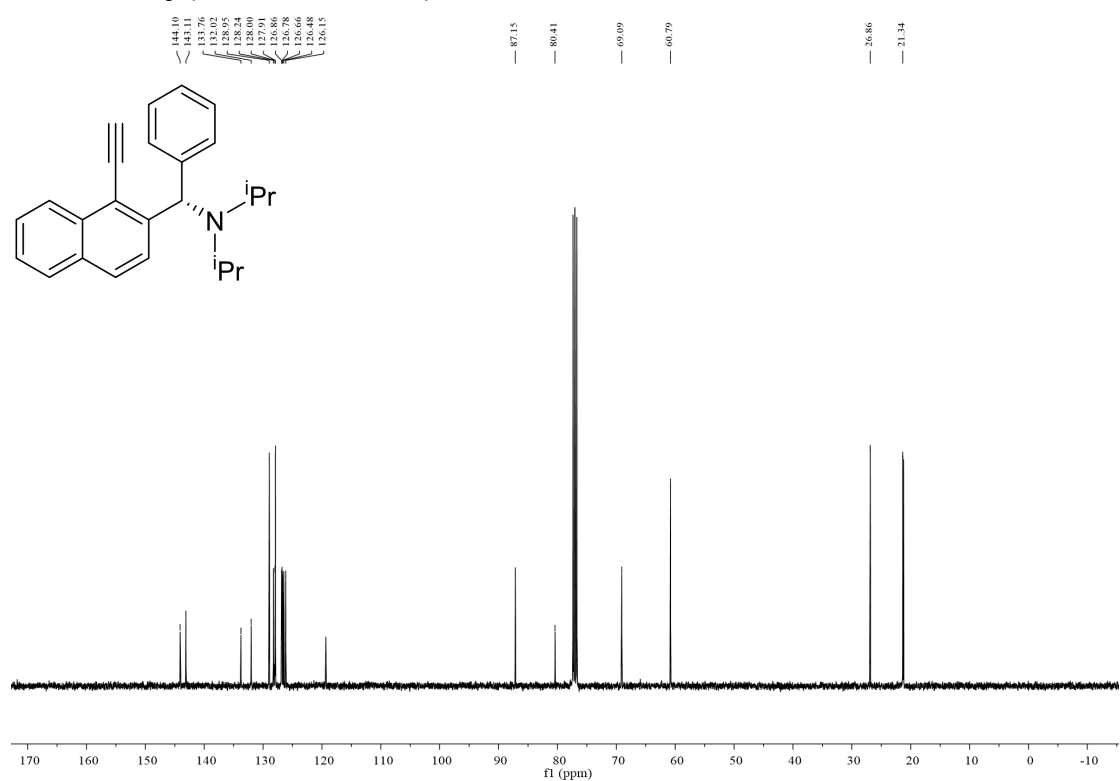







# <sup>1</sup>H NMR-5n (400 MHz, CDCl<sub>3</sub>)

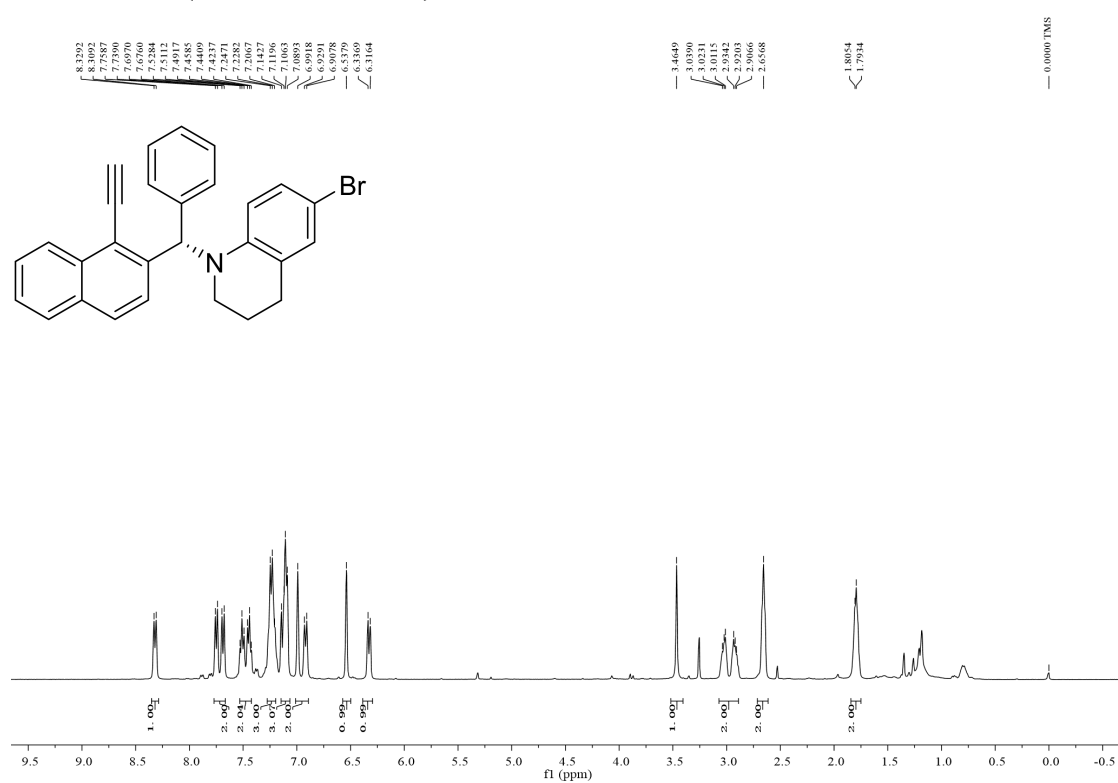

# <sup>13</sup>C NMR-5n (100 MHz, CDCl<sub>3</sub>)

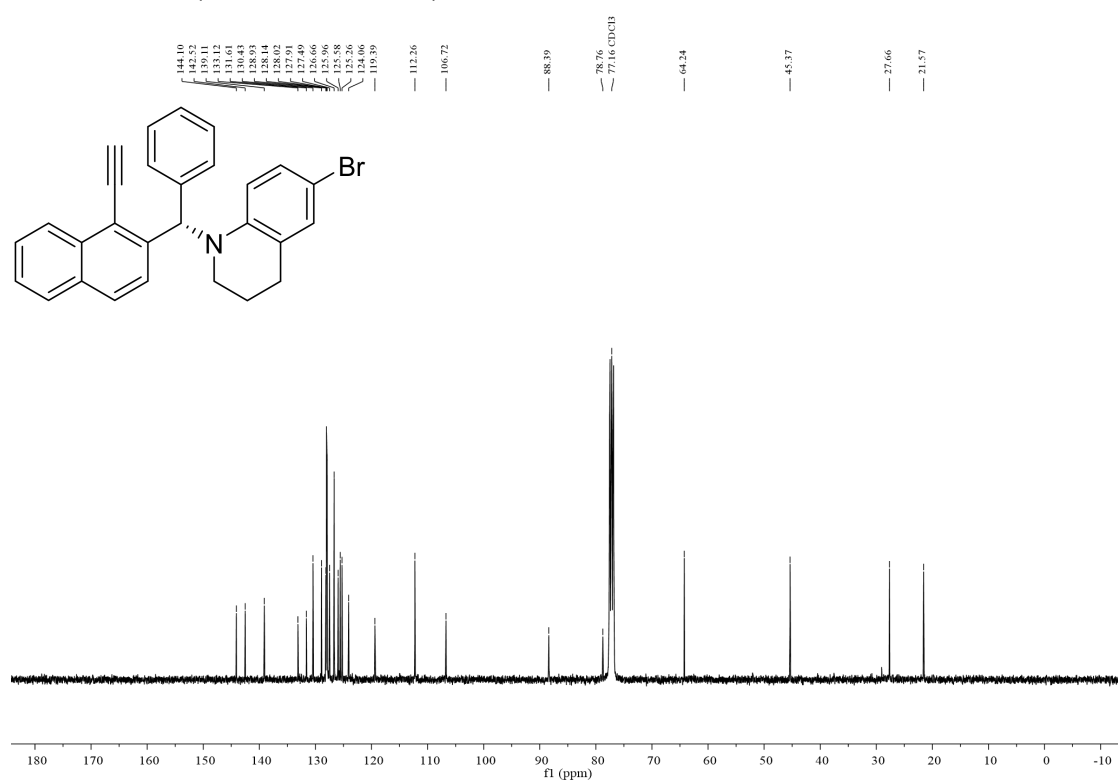

### <sup>1</sup>H NMR-6a (400 MHz, CDCl<sub>3</sub>)

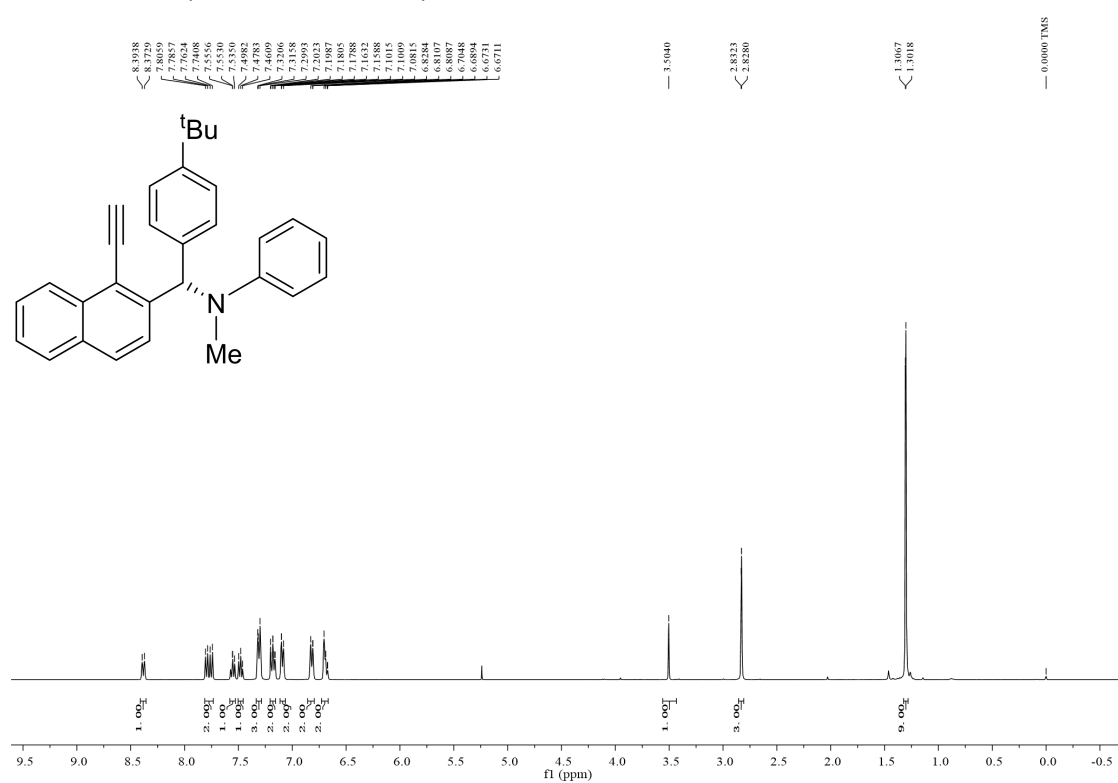

### <sup>13</sup>C NMR-6a (100 MHz, CDCl<sub>3</sub>)

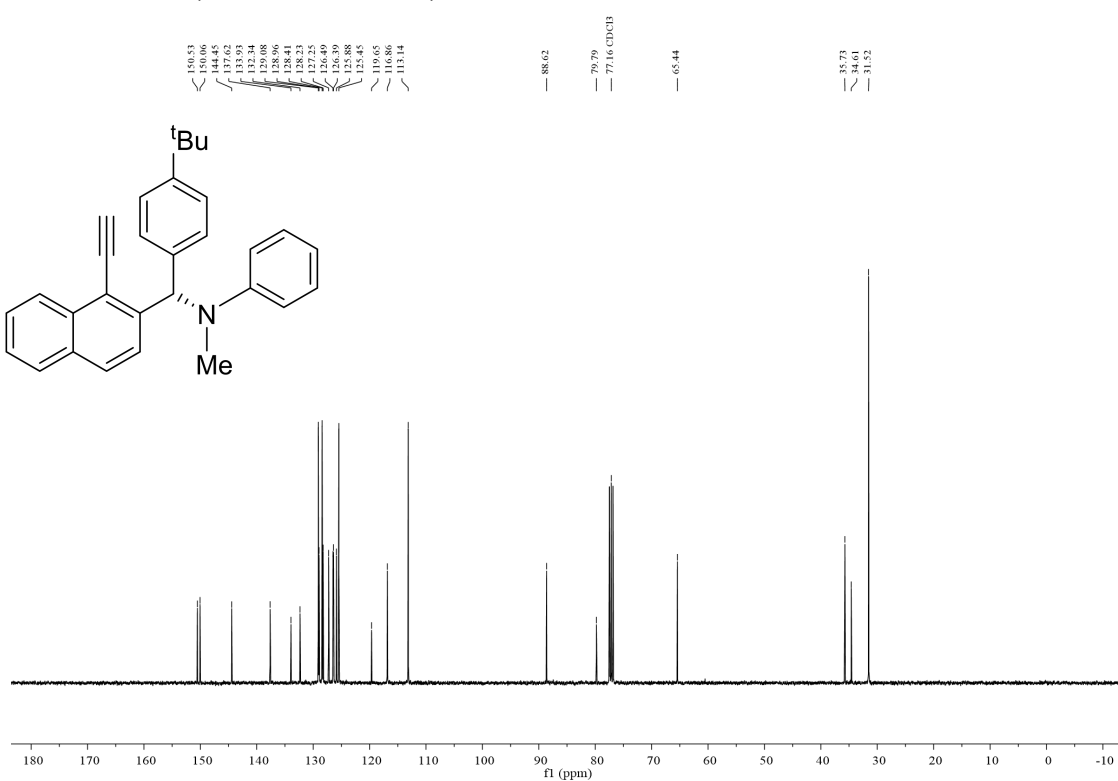



### <sup>1</sup>H NMR-6c (400 MHz, CDCl<sub>3</sub>)

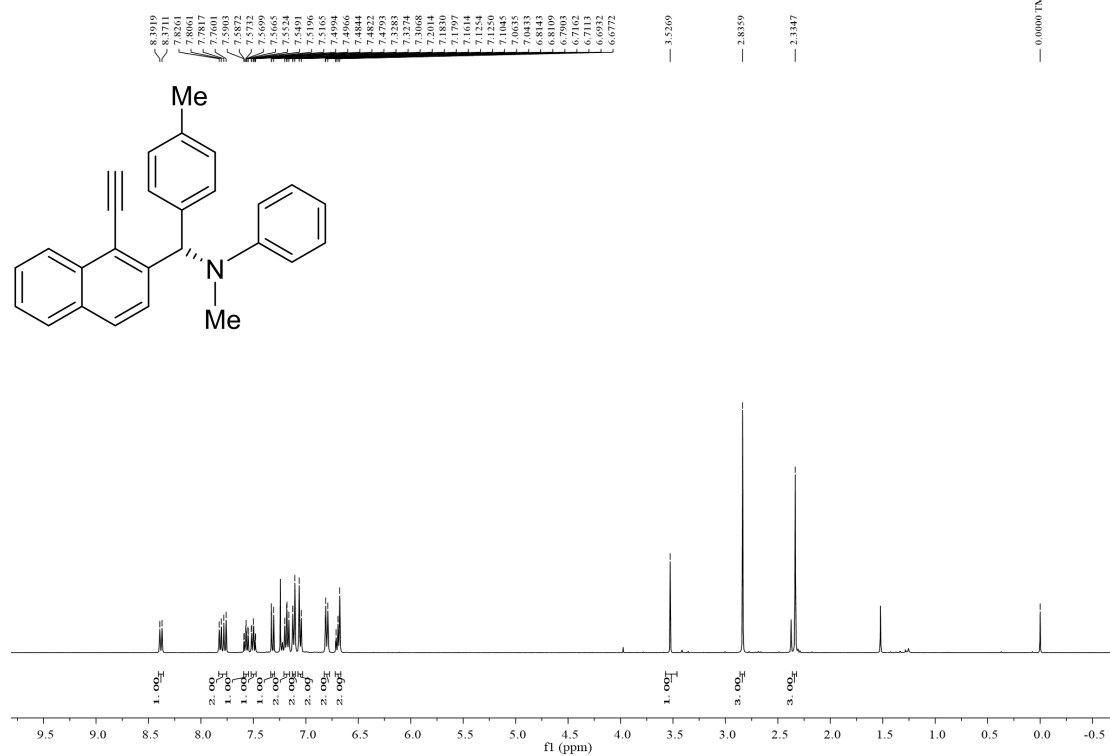

### <sup>13</sup>C NMR-6c (100 MHz, CDCl<sub>3</sub>)

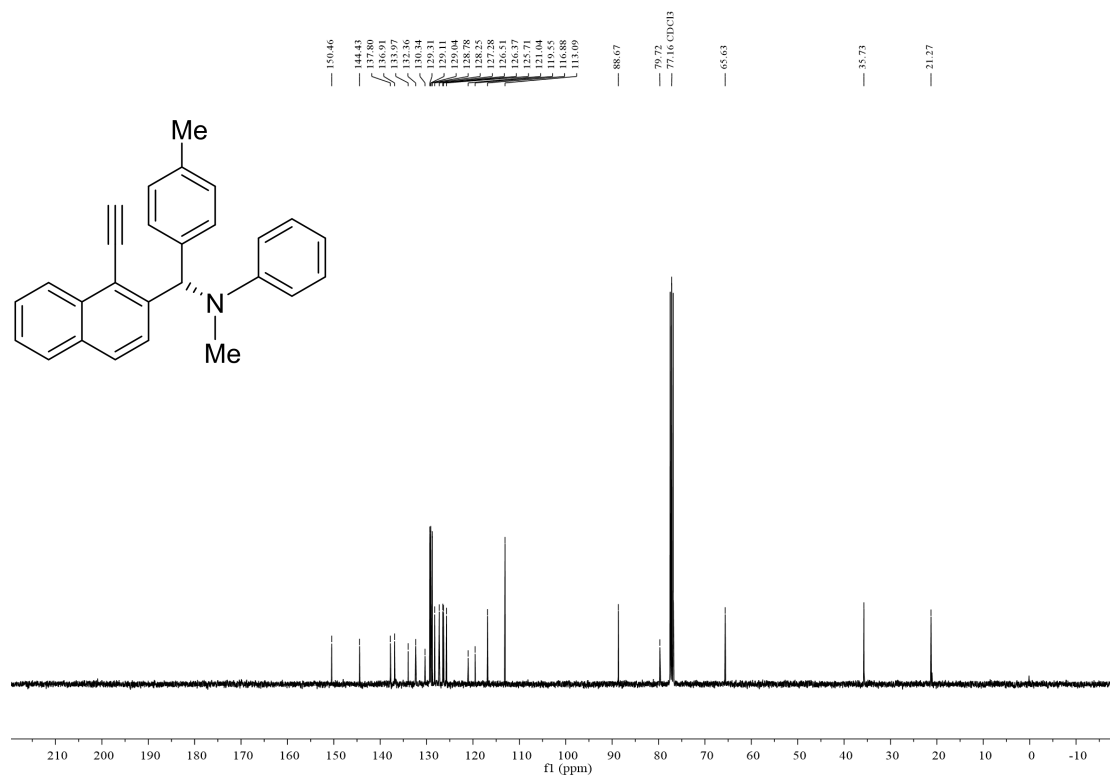

### <sup>1</sup>H NMR-6d (400 MHz, CDCl<sub>3</sub>)

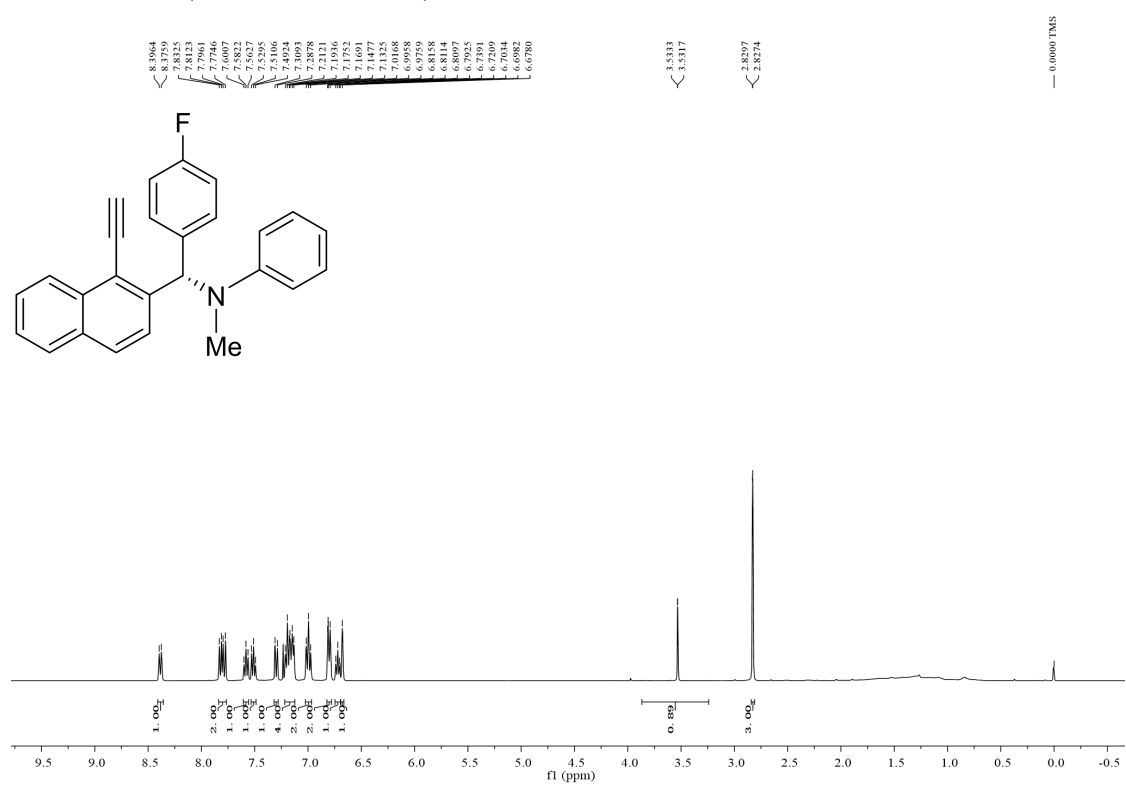

### <sup>13</sup>C NMR-6d (100 MHz, CDCl<sub>3</sub>)

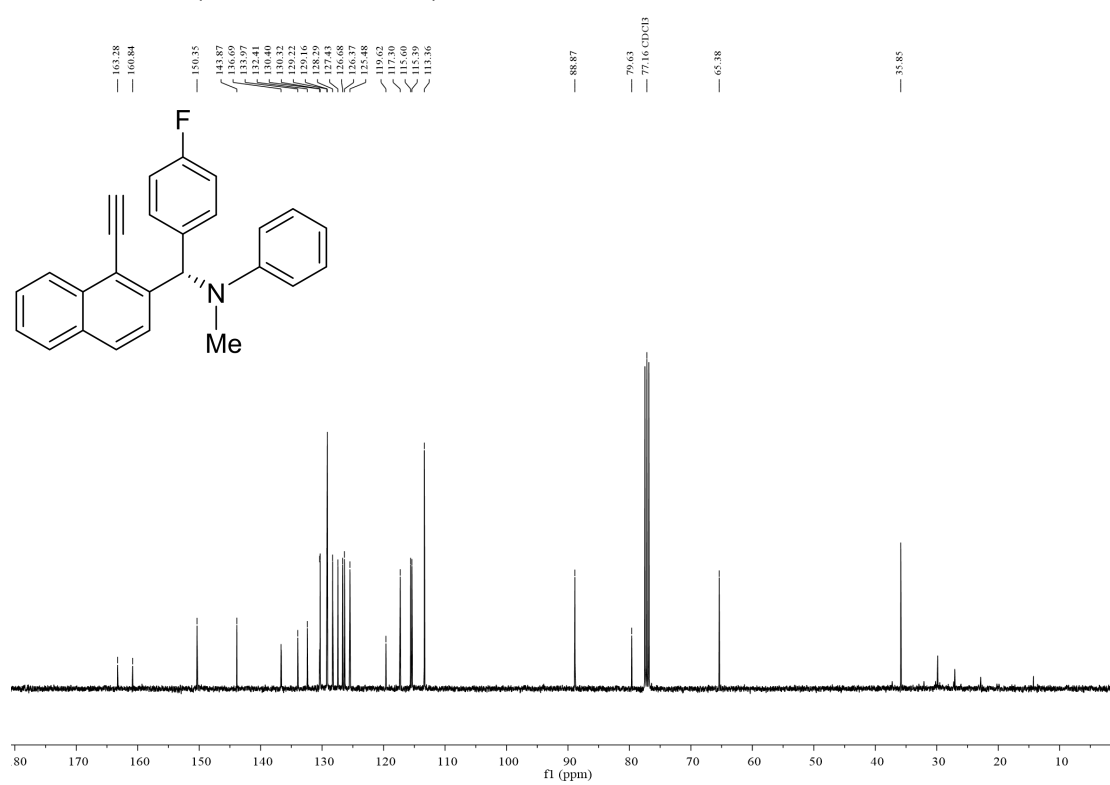

**<sup>19</sup>F NMR-6d (376 MHz, CDCl<sub>3</sub>)**

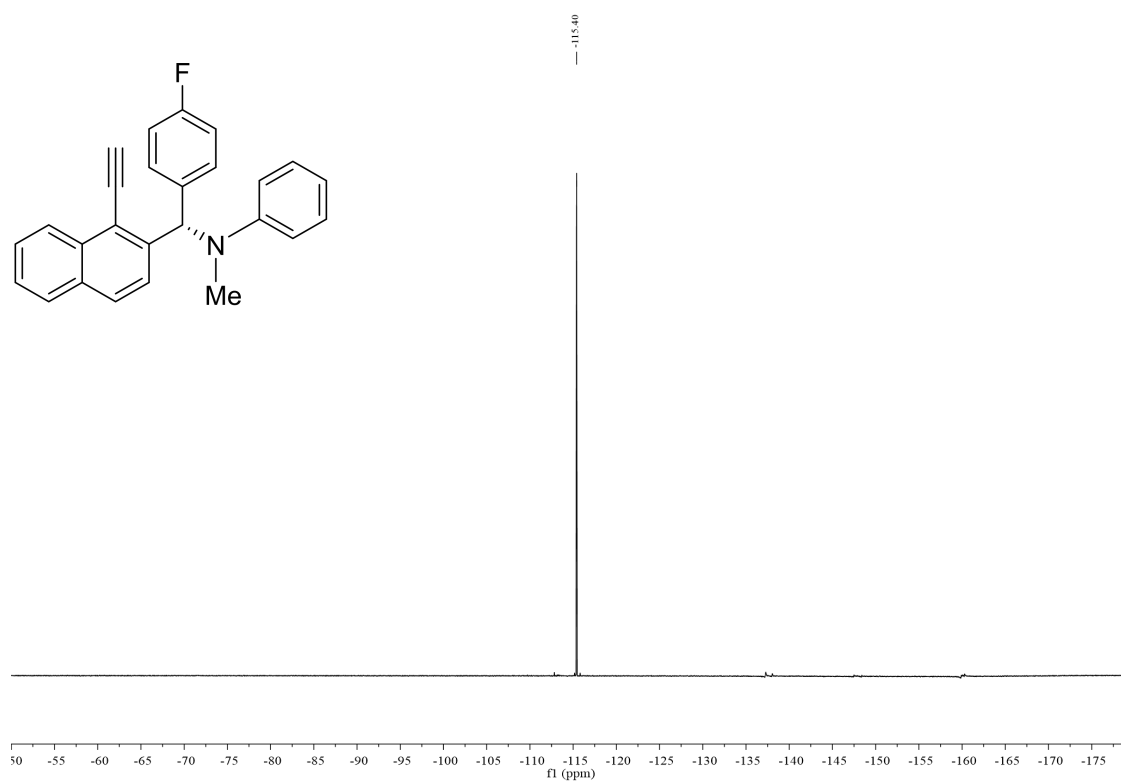

### <sup>1</sup>H NMR-6e (400 MHz, CDCl<sub>3</sub>)

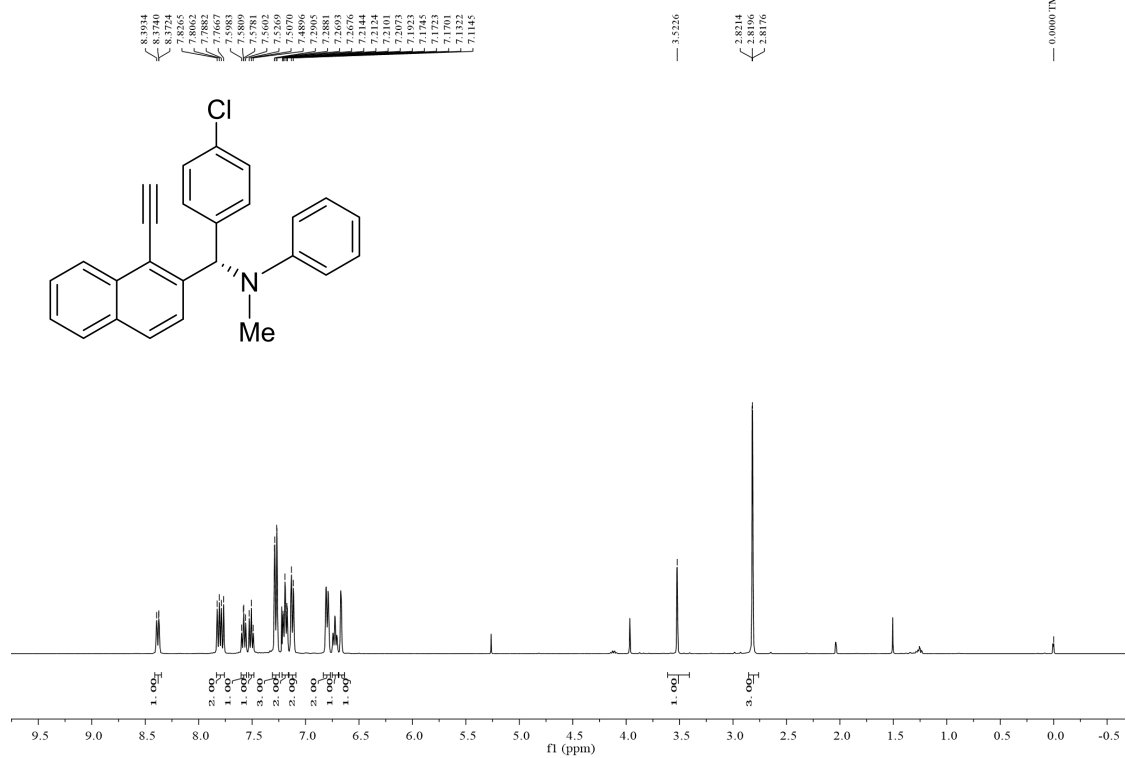

### <sup>13</sup>C NMR-6e (100 MHz, CDCl<sub>3</sub>)

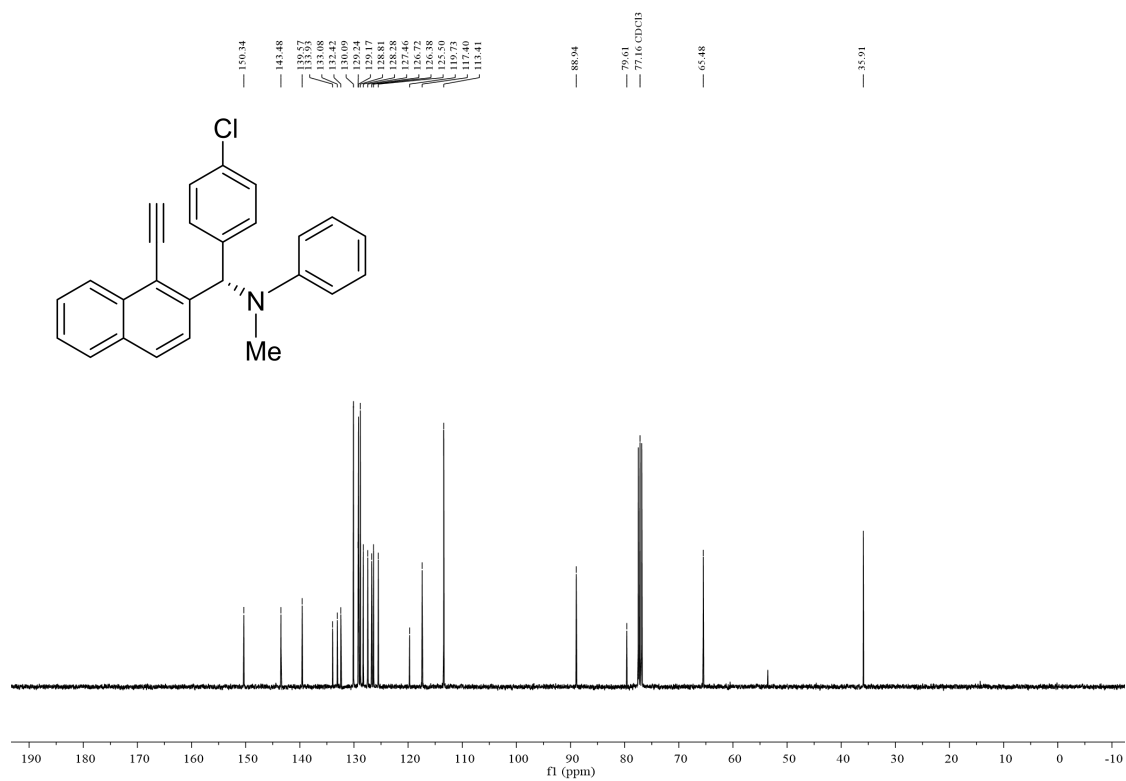

### <sup>1</sup>H NMR-6f (400 MHz, CDCl<sub>3</sub>)

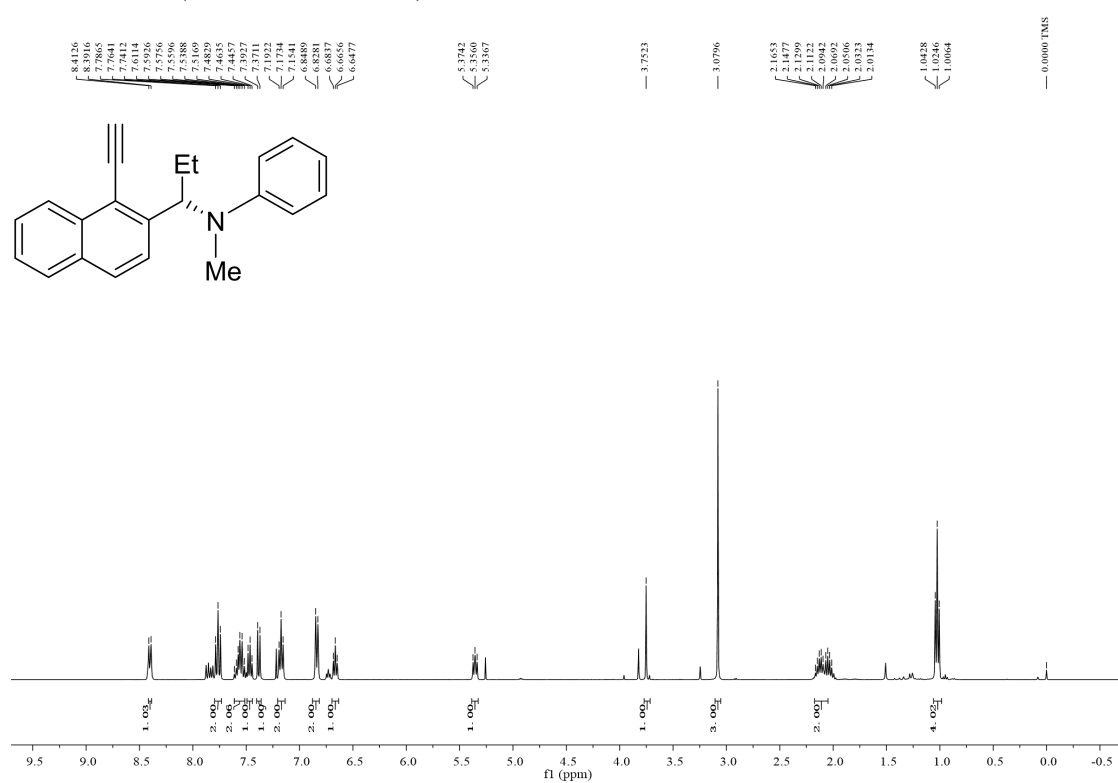

### <sup>13</sup>C NMR-6f (100 MHz, CDCl<sub>3</sub>)

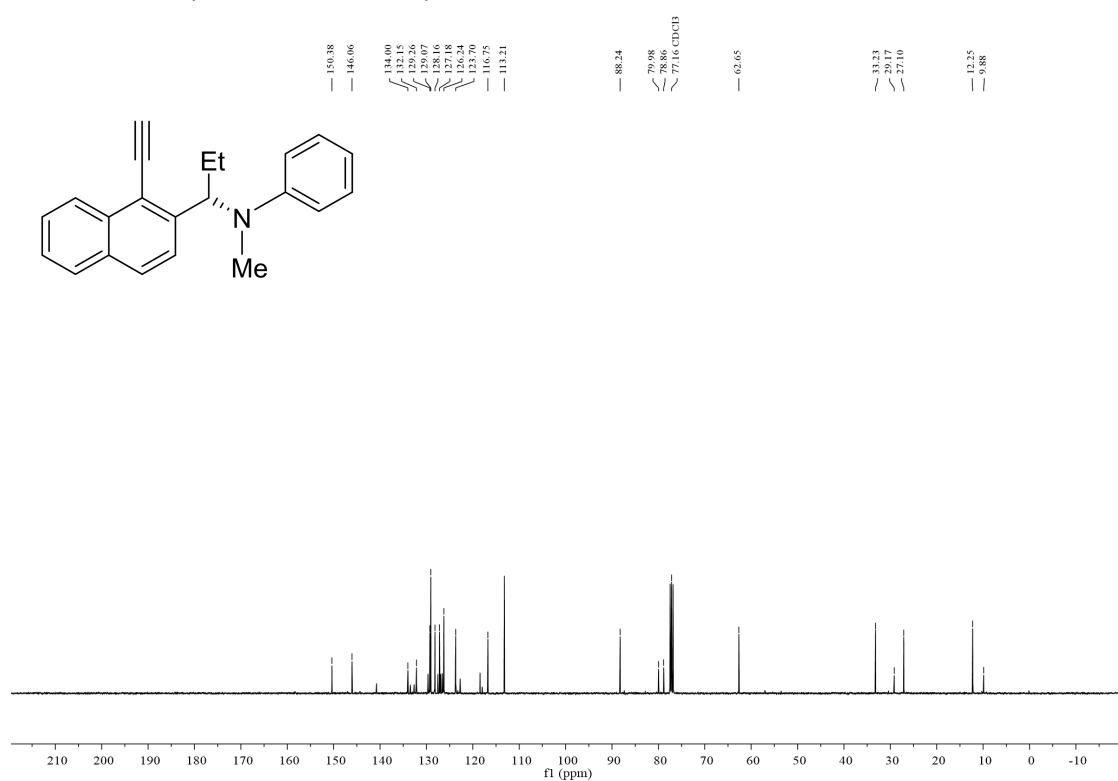



# <sup>1</sup>H NMR-7a (400 MHz, CDCl<sub>3</sub>)

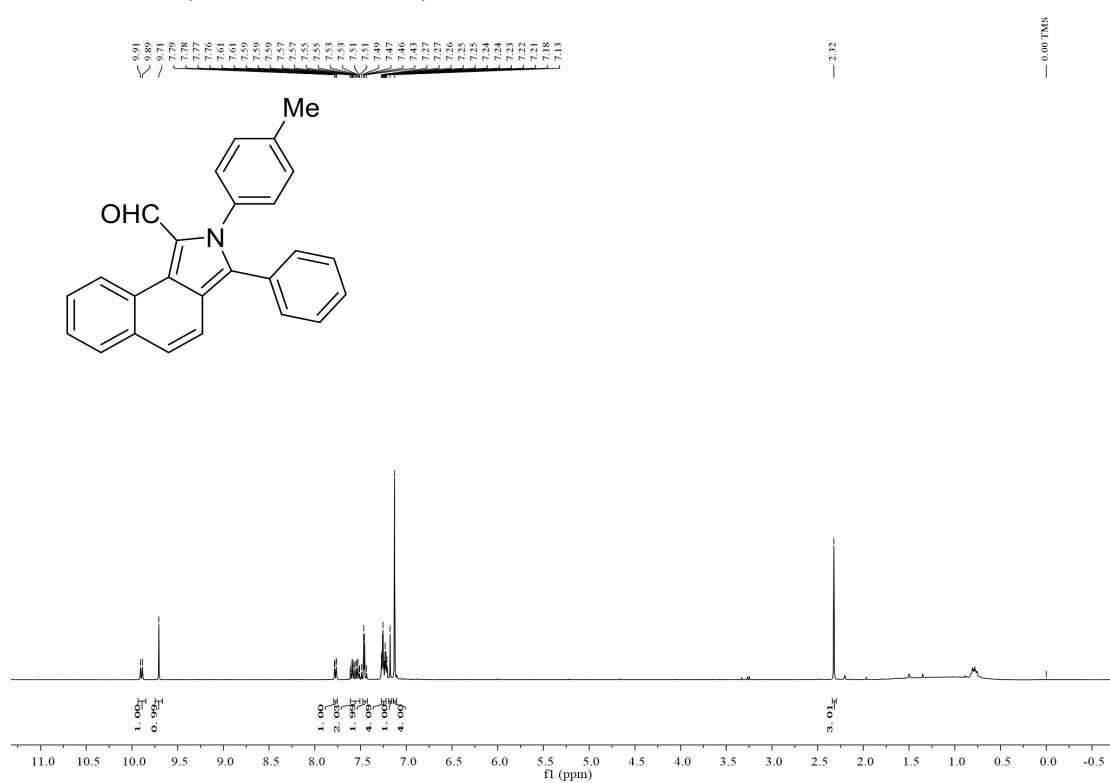

# <sup>13</sup>C NMR-7a (100 MHz, CDCl<sub>3</sub>)

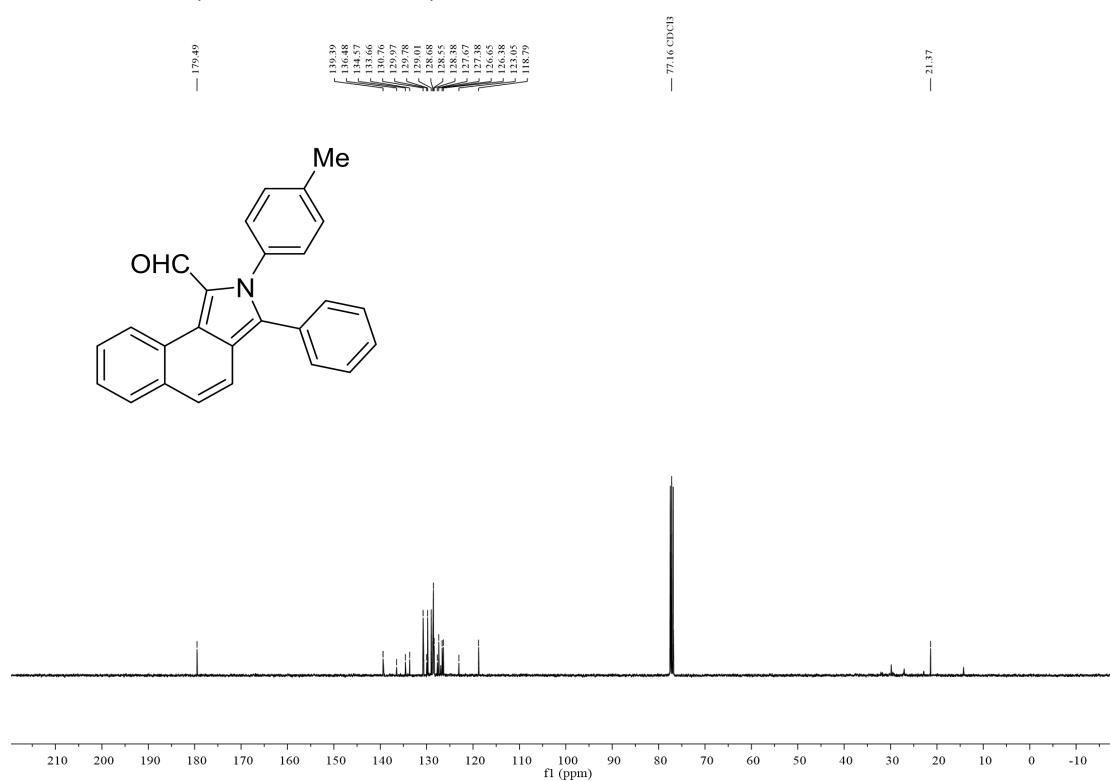



**<sup>19</sup>F NMR-8a (376 MHz, CDCl<sub>3</sub>)**

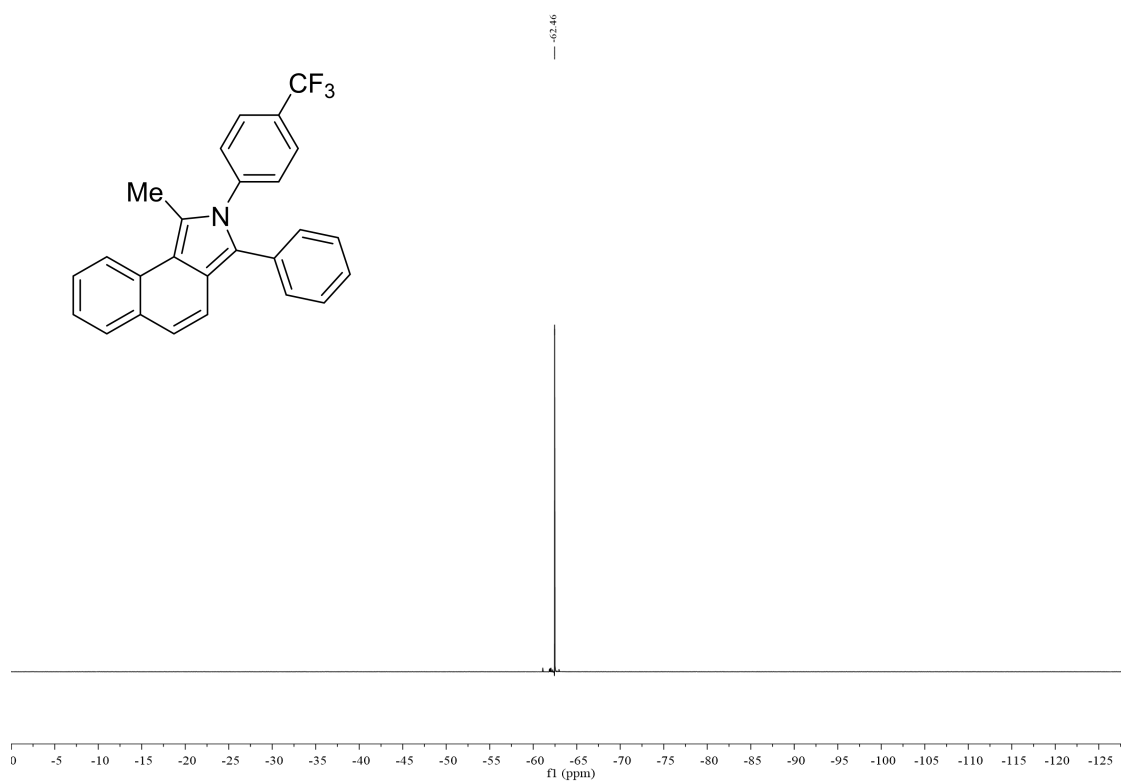

# <sup>1</sup>H NMR-9a (400 MHz, CDCl<sub>3</sub>)

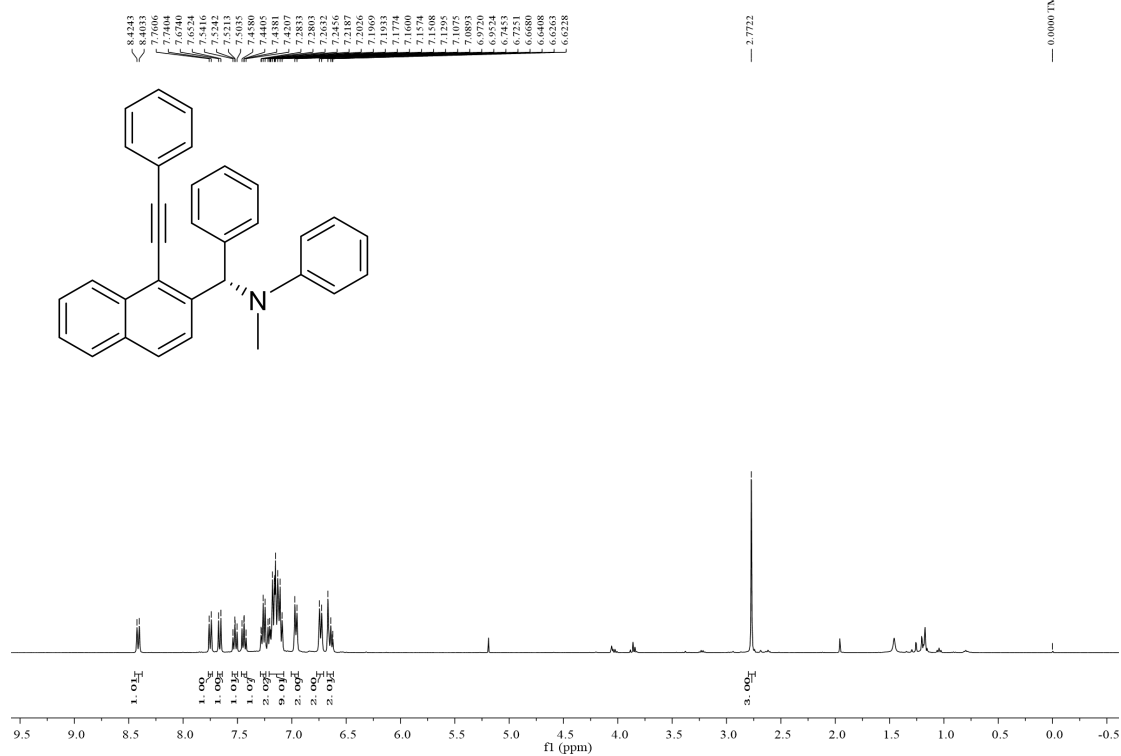

# <sup>13</sup>C NMR-9a (100 MHz, CDCl<sub>3</sub>)

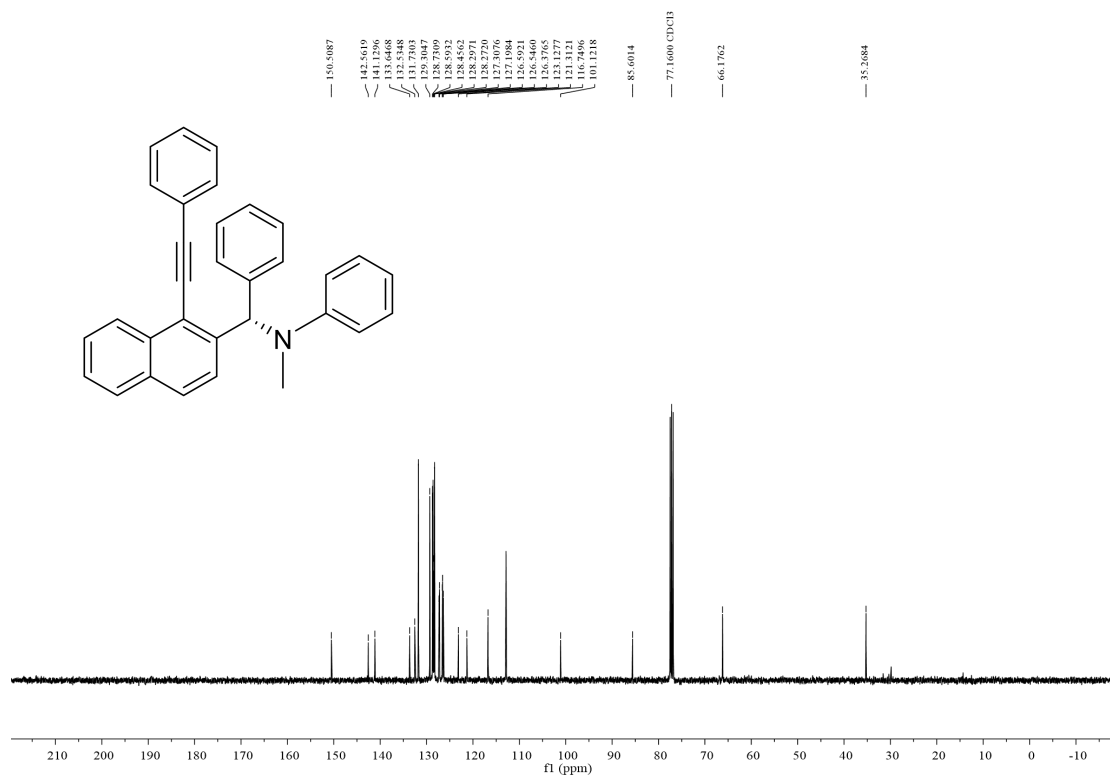

## VI Chiral HPLC analysis trace

### racemic-5a

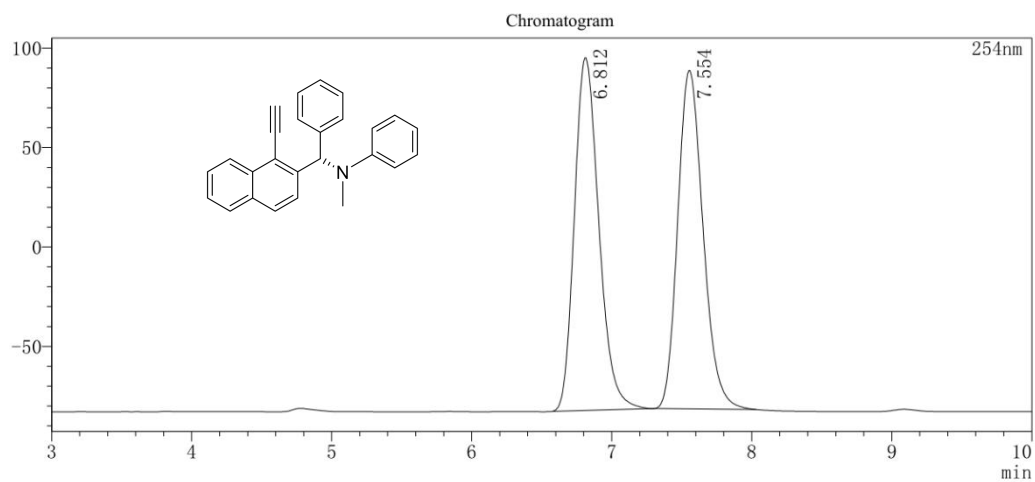

| 254nm |           | Peak Table |        |         |
|-------|-----------|------------|--------|---------|
| Peak# | Ret. Time | Area       | Height | Area%   |
| 1     | 6.812     | 2151871    | 177358 | 50.139  |
| 2     | 7.554     | 2139922    | 170228 | 49.861  |
| Total |           | 4291792    | 347586 | 100.000 |

### chiral-5a

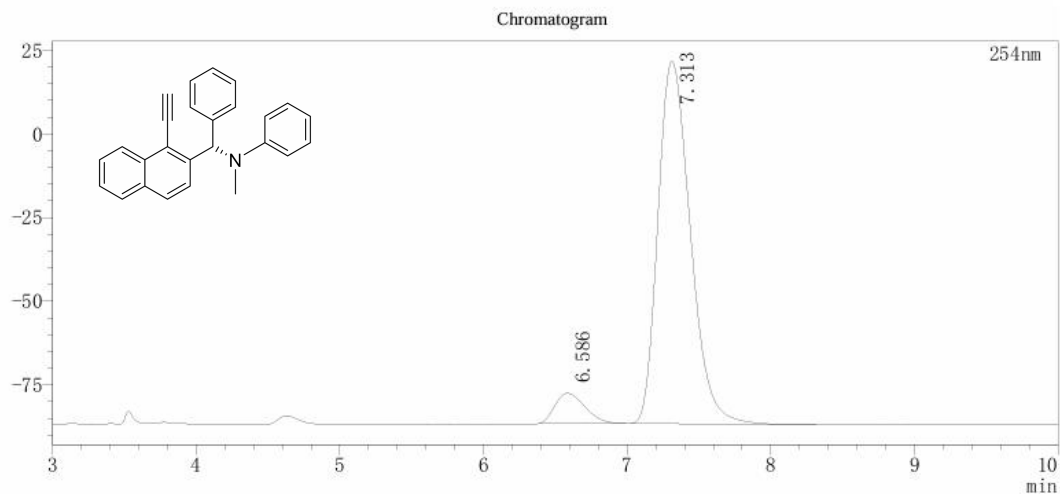

| A 254nm |           | Peak Table |        |         |
|---------|-----------|------------|--------|---------|
| Peak#   | Ret. Time | Area       | Height | Area%   |
| 1       | 6.586     | 131773     | 8995   | 7.218   |
| 2       | 7.313     | 1693931    | 108155 | 92.782  |
| Total   |           | 1825704    | 117149 | 100.000 |

## racemic-5b

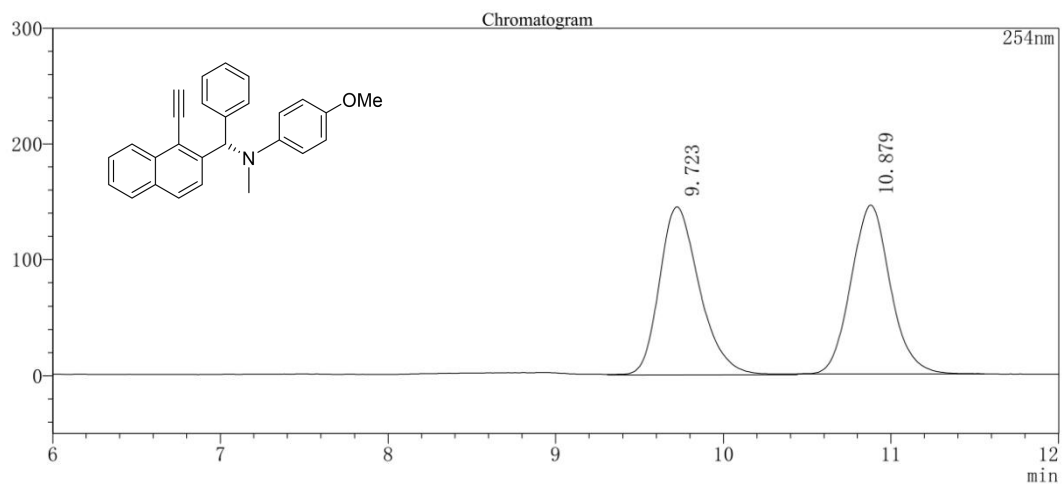

| Peak# | Ret. Time | Area    | Height | Area%   |
|-------|-----------|---------|--------|---------|
| 1     | 9.723     | 2417536 | 144749 | 50.386  |
| 2     | 10.879    | 2380472 | 145410 | 49.614  |
| Total |           | 4798008 | 290159 | 100.000 |

## chiral-5b

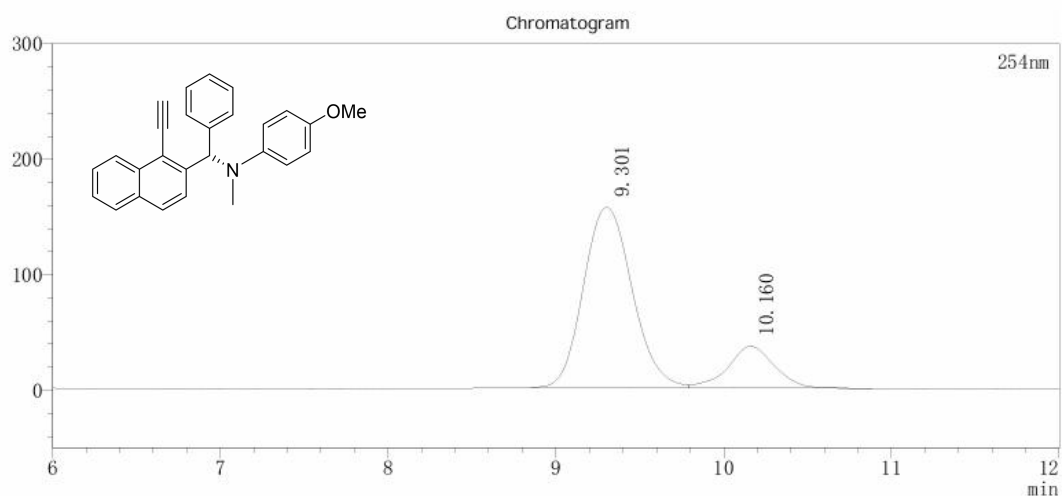

| Peak# | Ret. Time | Area    | Height | Area%   |
|-------|-----------|---------|--------|---------|
| 1     | 9.301     | 3142669 | 156033 | 81.793  |
| 2     | 10.160    | 699565  | 36302  | 18.207  |
| Total |           | 3842234 | 192334 | 100.000 |

## racemic-5c

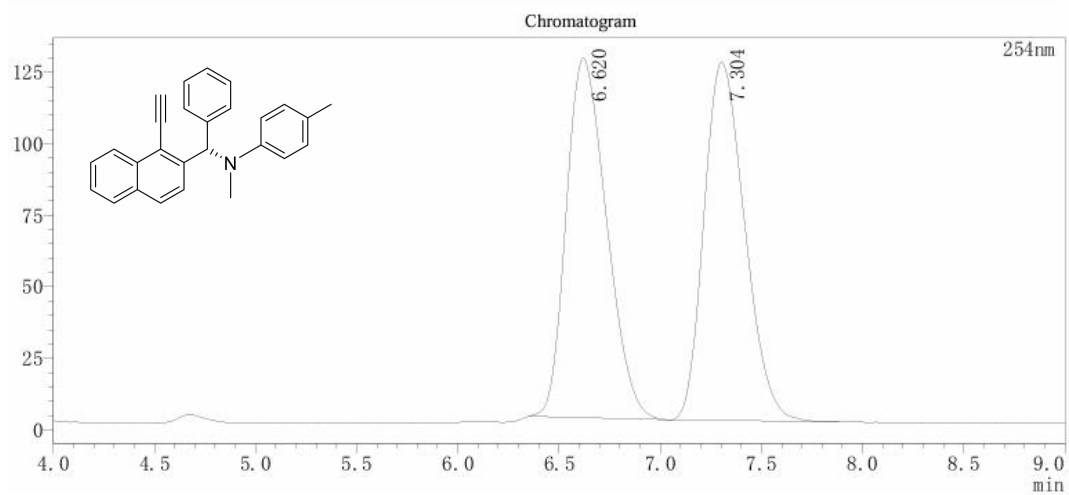

| Peak# | Ret. Time | Area    | Height | Area%   |
|-------|-----------|---------|--------|---------|
| 1     | 6.620     | 1747409 | 125726 | 49.856  |
| 2     | 7.304     | 1757527 | 125329 | 50.144  |
| Total |           | 3504936 | 251055 | 100.000 |

## chiral-5c

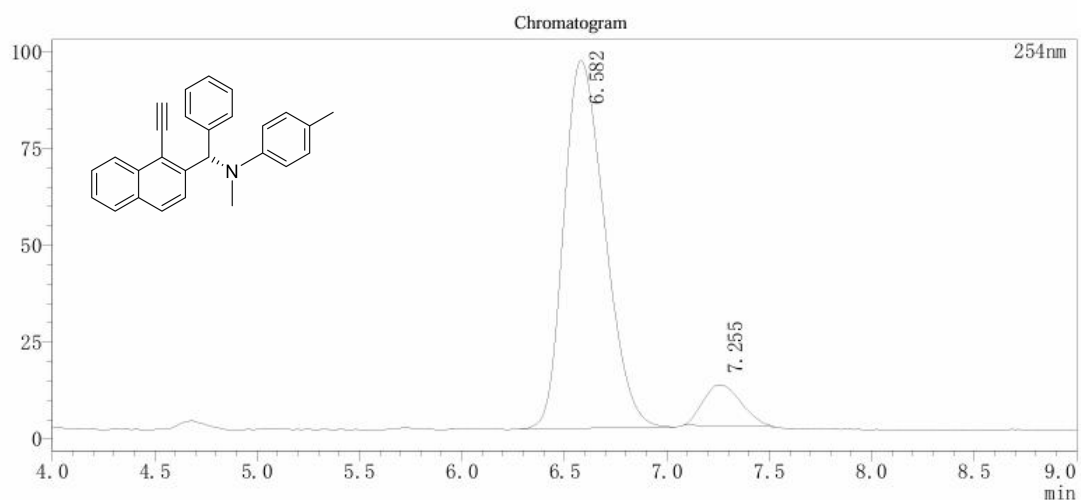

| Peak# | Ret. Time | Area    | Height | Area%   |
|-------|-----------|---------|--------|---------|
| 1     | 6.582     | 1321078 | 94875  | 90.589  |
| 2     | 7.255     | 137239  | 10586  | 9.411   |
| Total |           | 1458316 | 105461 | 100.000 |

## racemic-5d

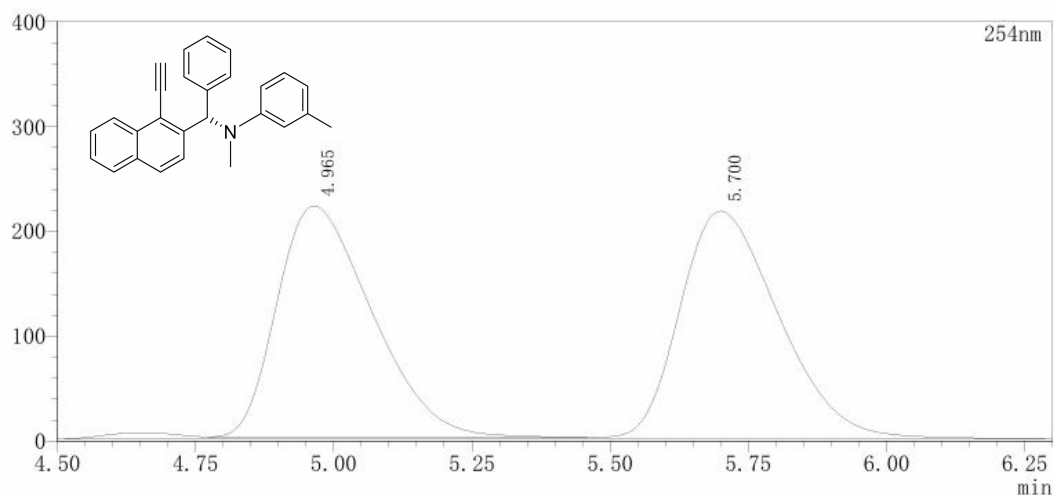

254nm Peak table

| Peak# | Ret. Time | Area    | Height | Area%   |
|-------|-----------|---------|--------|---------|
| 1     | 4.965     | 2626773 | 220547 | 49.431  |
| 2     | 5.700     | 2687243 | 216473 | 50.569  |
| Total |           | 5314016 | 437019 | 100.000 |

## chiral-5d

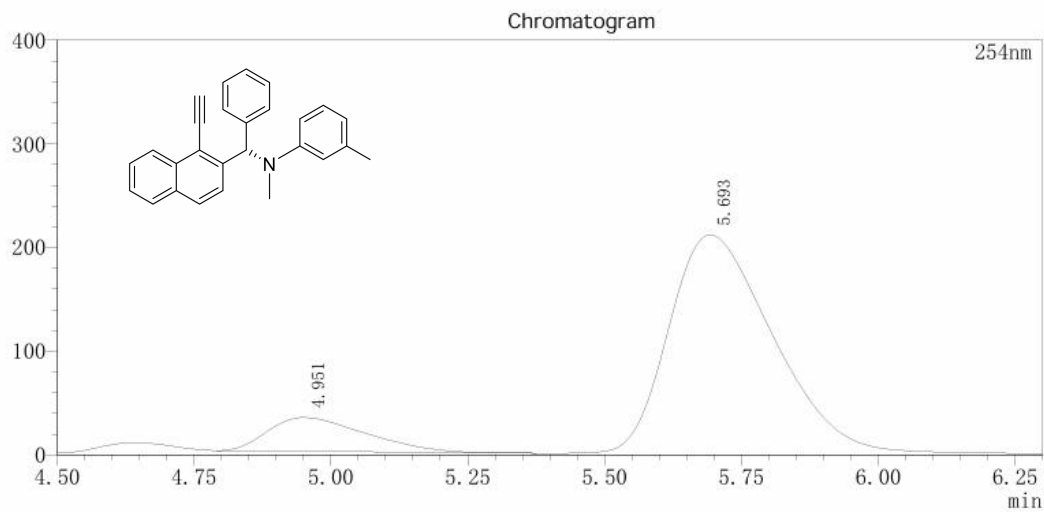

254nm Peak Table

| Peak# | Ret. Time | Area    | Height | Area%   |
|-------|-----------|---------|--------|---------|
| 1     | 4.951     | 402191  | 32601  | 12.512  |
| 2     | 5.693     | 2812131 | 211344 | 87.488  |
| Total |           | 3214322 | 243946 | 100.000 |

## racemic-5e

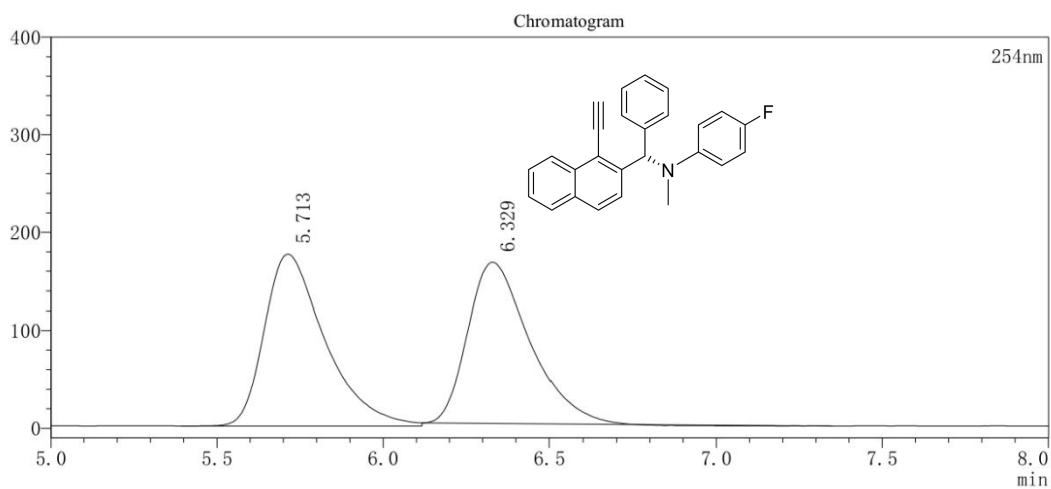

| 254nm |           | Peak Table |        |         |  |
|-------|-----------|------------|--------|---------|--|
| Peak# | Ret. Time | Area       | Height | Area%   |  |
| 1     | 5.713     | 2242830    | 175565 | 51.342  |  |
| 2     | 6.329     | 2125571    | 164474 | 48.658  |  |
| Total |           | 4368402    | 340039 | 100.000 |  |

## chiral-5e

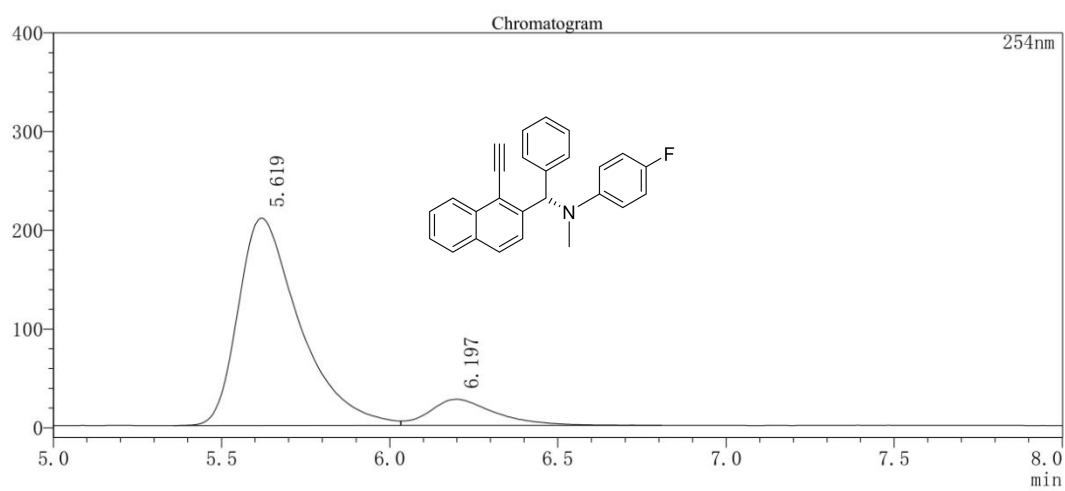

| 254nm |           | Peak Table |        |         |  |
|-------|-----------|------------|--------|---------|--|
| Peak# | Ret. Time | Area       | Height | Area%   |  |
| 1     | 5.619     | 2682623    | 210398 | 88.154  |  |
| 2     | 6.197     | 360501     | 26549  | 11.846  |  |
| Total |           | 3043124    | 236946 | 100.000 |  |

## racemic-5f

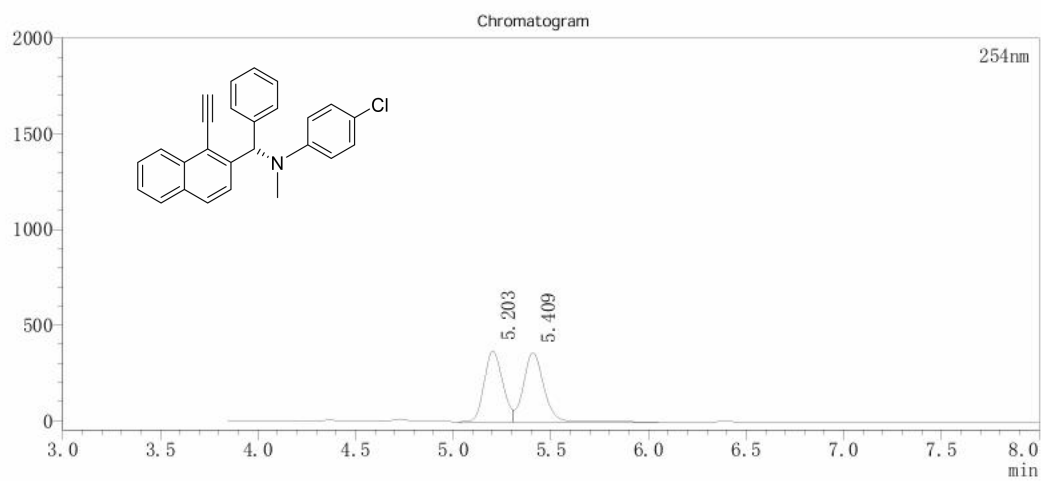

| Peak# | Ret. Time | Area    | Height | Area%   |
|-------|-----------|---------|--------|---------|
| 1     | 5.203     | 2422334 | 369580 | 48.658  |
| 2     | 5.409     | 2555982 | 360326 | 51.342  |
| Total |           | 4978316 | 729906 | 100.000 |

## chiral-5f

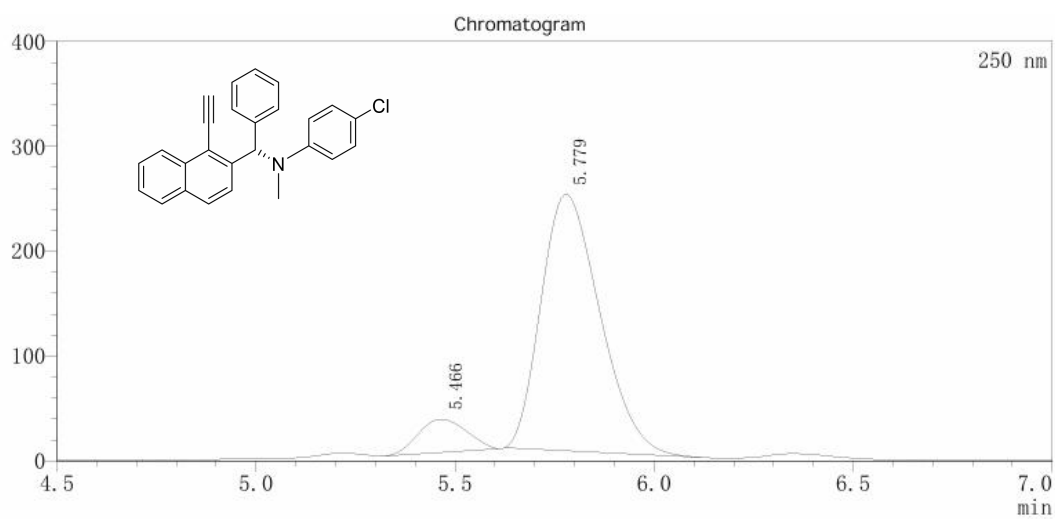

| Peak# | Ret. Time | Area    | Height | Area%   |
|-------|-----------|---------|--------|---------|
| 1     | 5.466     | 267579  | 31802  | 9.616   |
| 2     | 5.779     | 2514964 | 244322 | 90.384  |
| Total |           | 2782543 | 276124 | 100.000 |

## racemic-5g

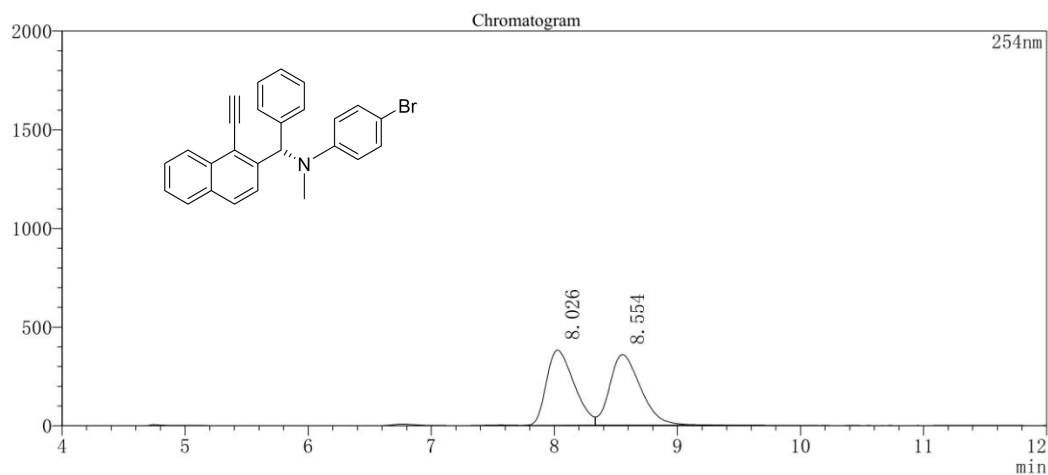

| Peak# | Ret. Time | Area     | Height | Area%   |
|-------|-----------|----------|--------|---------|
| 1     | 8.026     | 5952711  | 380803 | 48.786  |
| 2     | 8.554     | 6248915  | 358014 | 51.214  |
| Total |           | 12201626 | 738817 | 100.000 |

## chiral-5g

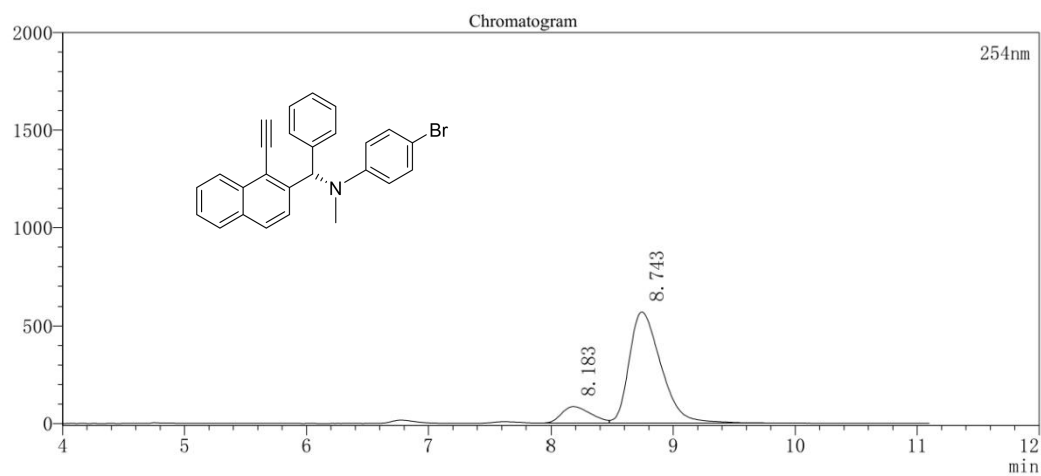

| Peak# | Ret. Time | Area     | Height | Area%   |
|-------|-----------|----------|--------|---------|
| 1     | 8.183     | 1417432  | 84923  | 12.067  |
| 2     | 8.743     | 10328476 | 570207 | 87.933  |
| Total |           | 11745907 | 655131 | 100.000 |

## racemic-5h

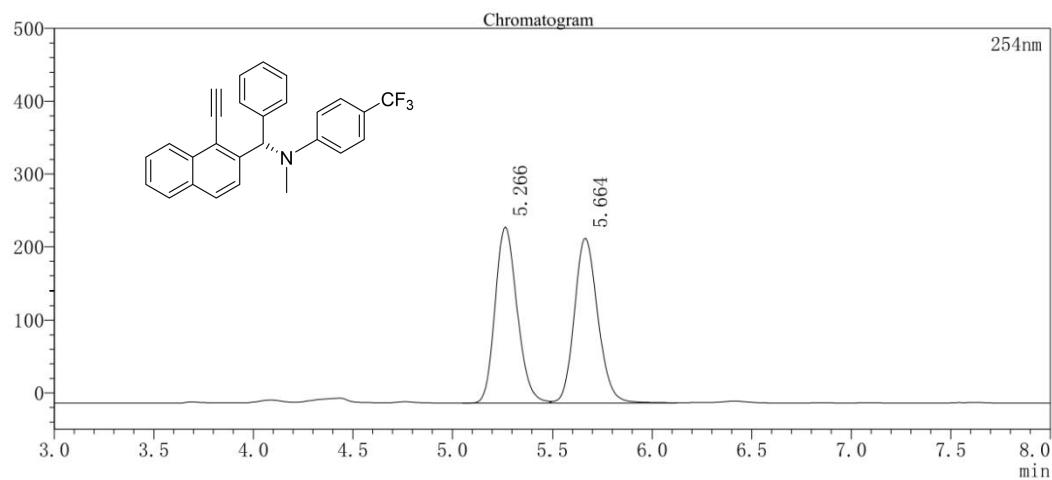

| 254nm |           | Peak Table |        |         |
|-------|-----------|------------|--------|---------|
| Peak# | Ret. Time | Area       | Height | Area%   |
| 1     | 5.266     | 1859570    | 241168 | 49.997  |
| 2     | 5.664     | 1859794    | 225125 | 50.003  |
| Total |           | 3719363    | 466293 | 100.000 |

## chiral-5h

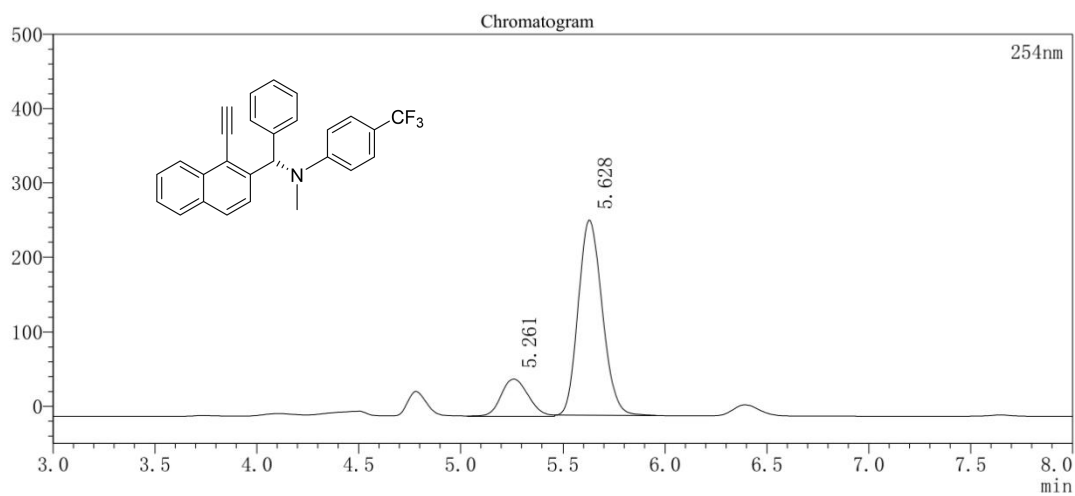

| 254nm |           | Peak Table |        |         |
|-------|-----------|------------|--------|---------|
| Peak# | Ret. Time | Area       | Height | Area%   |
| 1     | 5.261     | 470121     | 50174  | 17.933  |
| 2     | 5.628     | 2151371    | 261694 | 82.067  |
| Total |           | 2621492    | 311868 | 100.000 |

## racemic-5i

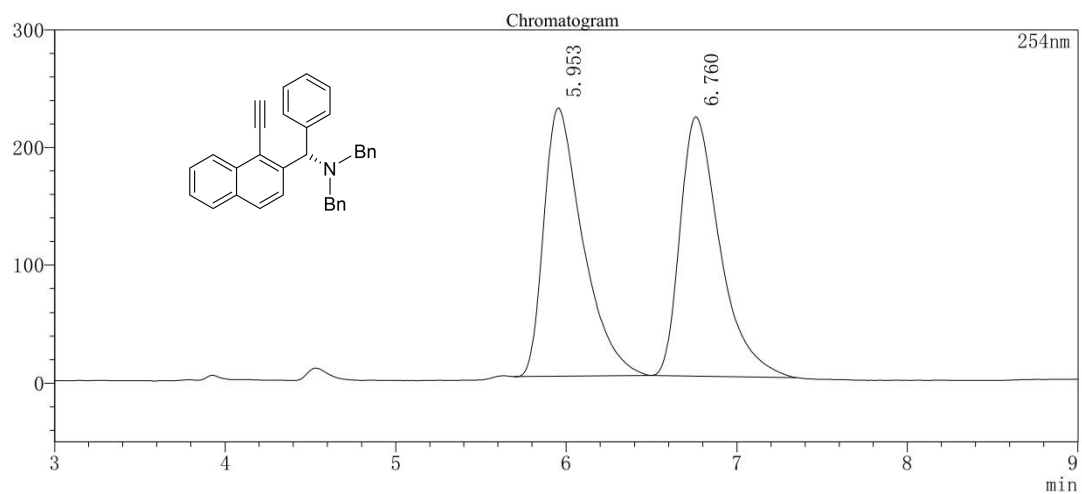

| Peak# | Ret. Time | Area    | Height | Area%   |
|-------|-----------|---------|--------|---------|
| 1     | 5.953     | 3610835 | 227617 | 50.194  |
| 2     | 6.760     | 3582903 | 220029 | 49.806  |
| Total |           | 7193738 | 447646 | 100.000 |

## chiral-5i

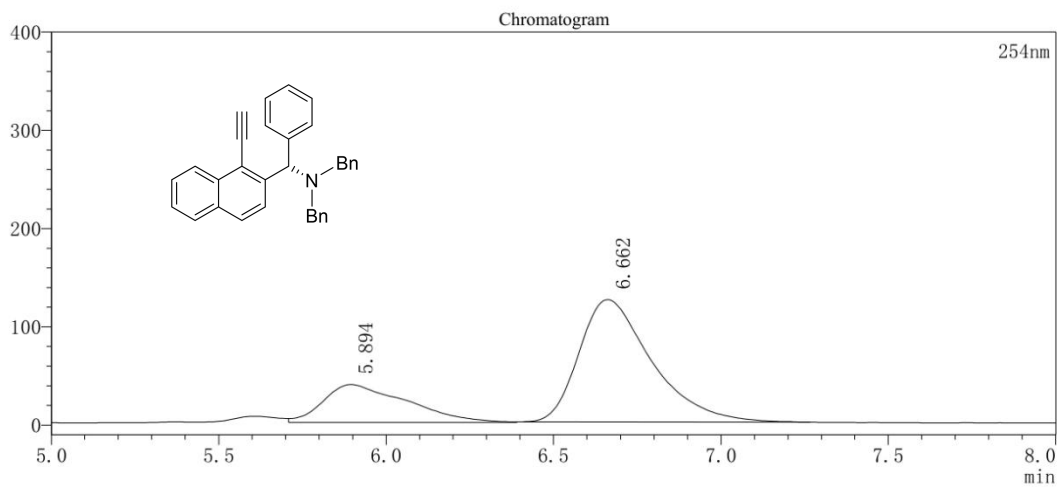

| Peak# | Ret. Time | Area    | Height | Area%   |
|-------|-----------|---------|--------|---------|
| 1     | 5.894     | 672057  | 38610  | 26.395  |
| 2     | 6.662     | 1874077 | 124521 | 73.605  |
| Total |           | 2546135 | 163132 | 100.000 |

## racemic-5j

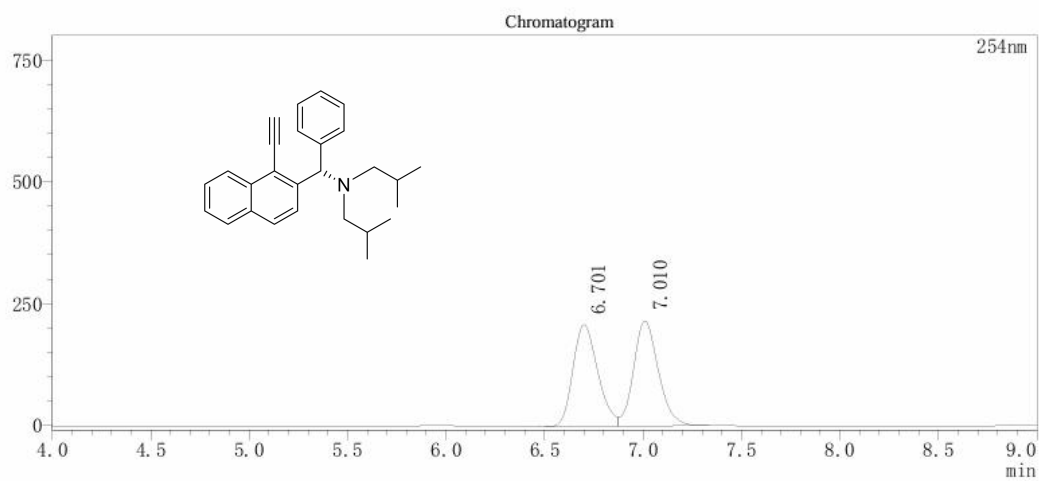

254nm

| Peak# | Ret. Time | Area    | Height | Area%   |
|-------|-----------|---------|--------|---------|
| 1     | 6.701     | 1826196 | 208742 | 49.312  |
| 2     | 7.010     | 1877137 | 215836 | 50.688  |
| Total |           | 3703333 | 424578 | 100.000 |

## chiral-5j

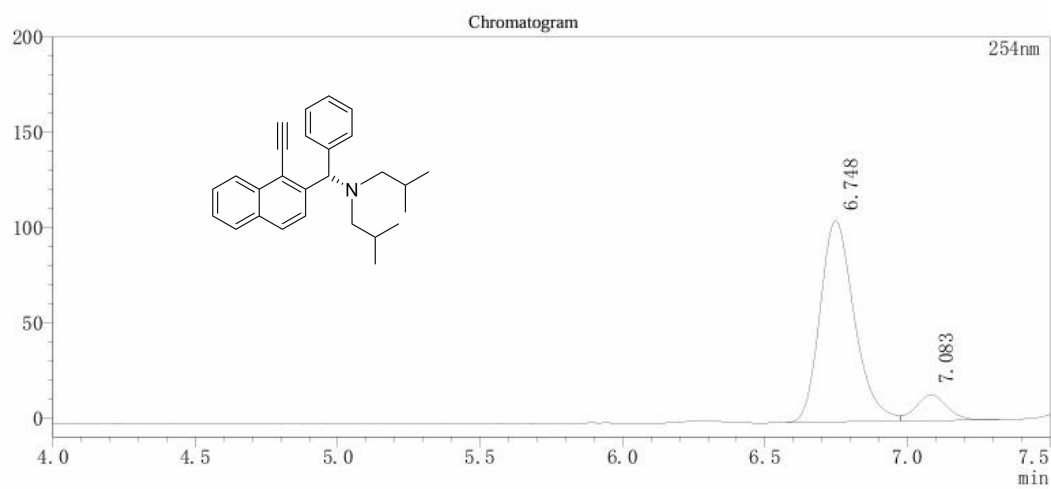

254nm

| Peak# | Ret. Time | Area   | Height | Area%   |
|-------|-----------|--------|--------|---------|
| 1     | 6.748     | 884644 | 105873 | 89.572  |
| 2     | 7.083     | 102988 | 13716  | 10.428  |
| Total |           | 987632 | 119589 | 100.000 |

## racemic-5k

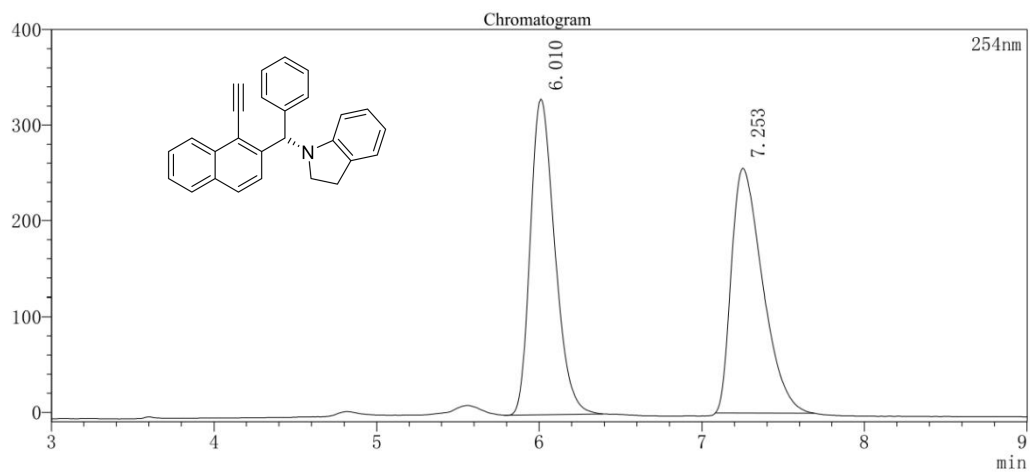

| 254nm |           | Peak Table |        |         |
|-------|-----------|------------|--------|---------|
| Peak# | Ret. Time | Area       | Height | Area%   |
| 1     | 6.010     | 3455371    | 329781 | 50.263  |
| 2     | 7.253     | 3419229    | 255539 | 49.737  |
| Total |           | 6874599    | 585320 | 100.000 |

## chiral-5k

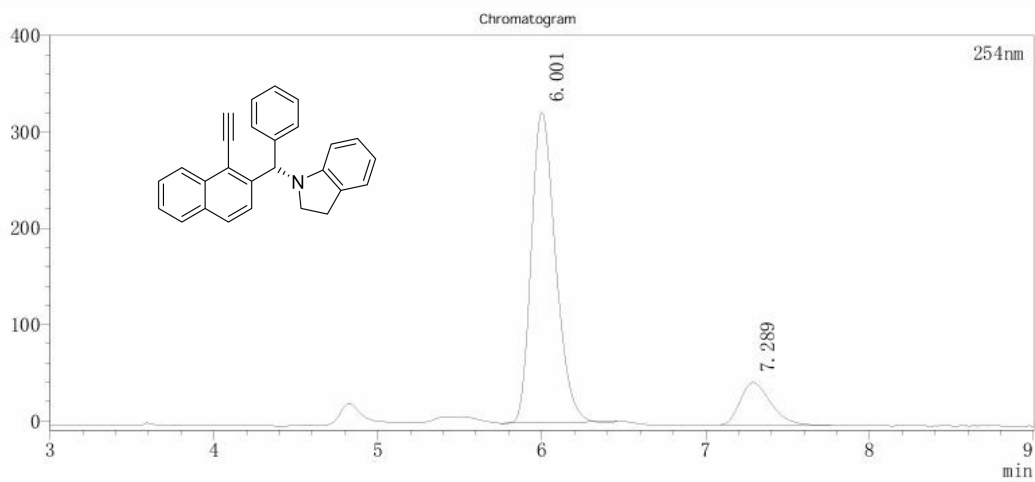

| 254nm |           | Peak Table |        |         |
|-------|-----------|------------|--------|---------|
| Peak# | Ret. Time | Area       | Height | Area%   |
| 1     | 6.001     | 3312739    | 322352 | 85.251  |
| 2     | 7.289     | 573105     | 43969  | 14.749  |
| Total |           | 3885844    | 366321 | 100.000 |

## racemic-5l

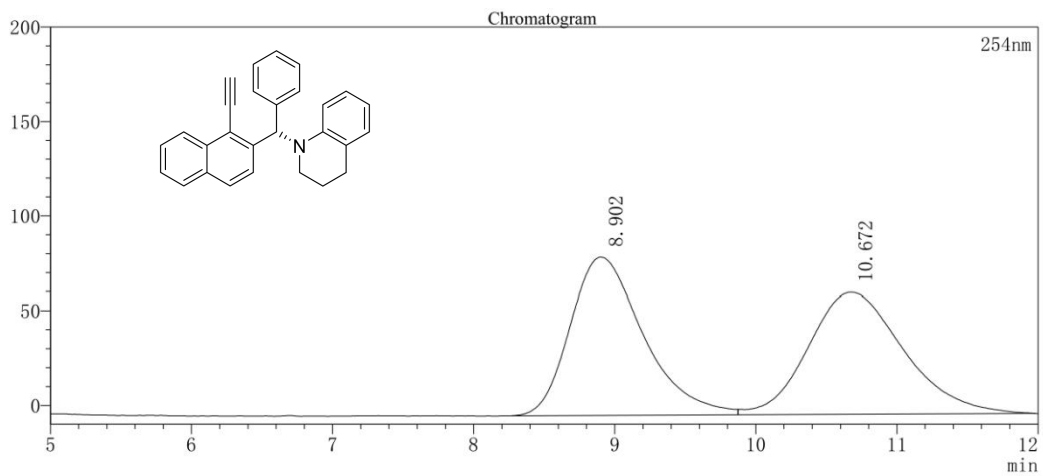

| 254nm |           | Peak Table |        |         |
|-------|-----------|------------|--------|---------|
| Peak# | Ret. Time | Area       | Height | Area%   |
| 1     | 8.902     | 3018611    | 83491  | 49.918  |
| 2     | 10.672    | 3028588    | 64386  | 50.082  |
| Total |           | 6047199    | 147877 | 100.000 |

## chiral-5l

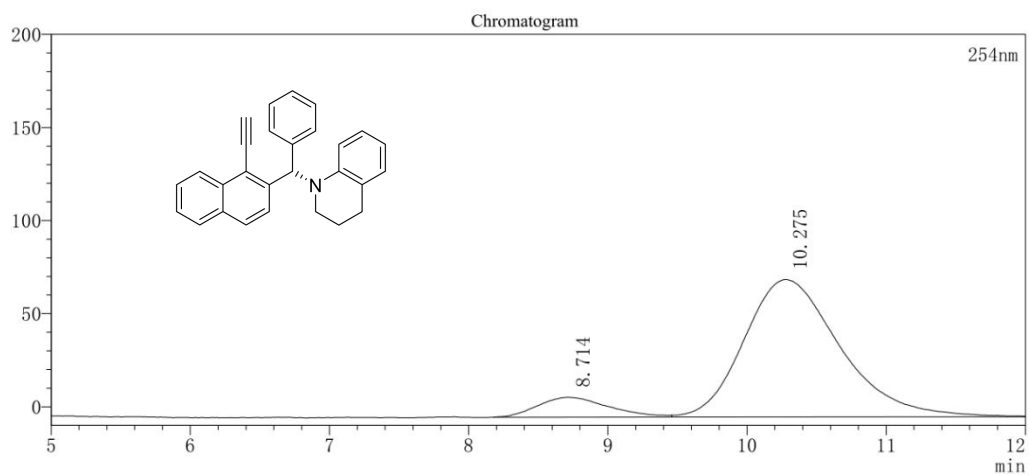

| 254nm |           | Peak Table |        |         |
|-------|-----------|------------|--------|---------|
| Peak# | Ret. Time | Area       | Height | Area%   |
| 1     | 8.714     | 374164     | 10610  | 9.571   |
| 2     | 10.275    | 3535336    | 73765  | 90.429  |
| Total |           | 3909500    | 84376  | 100.000 |

## racemic-5m

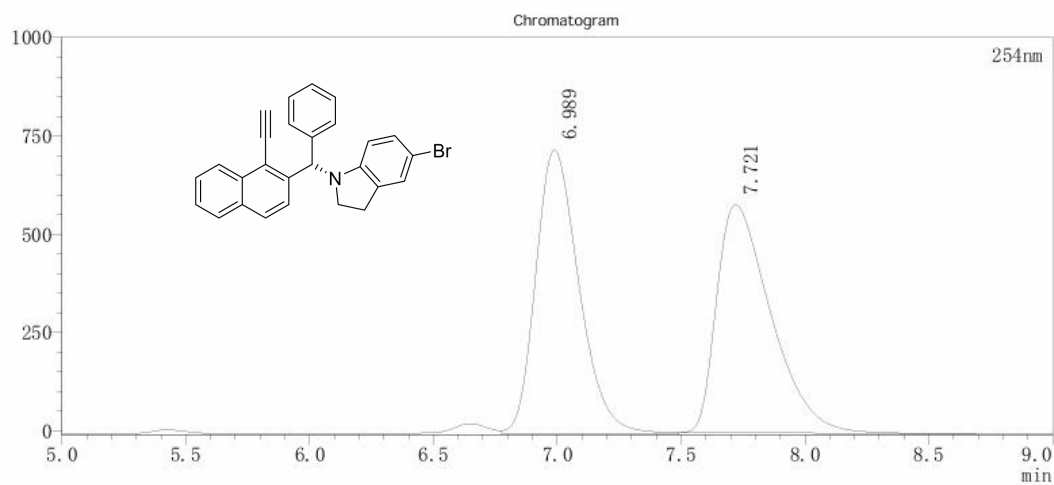

| 254nm |           | Peak Table |         |         |
|-------|-----------|------------|---------|---------|
| Peak# | Ret. Time | Area       | Height  | Area%   |
| 1     | 6.989     | 8794203    | 722461  | 49.987  |
| 2     | 7.721     | 8798606    | 579554  | 50.013  |
| Total |           | 17592810   | 1302015 | 100.000 |

## chiral-5m

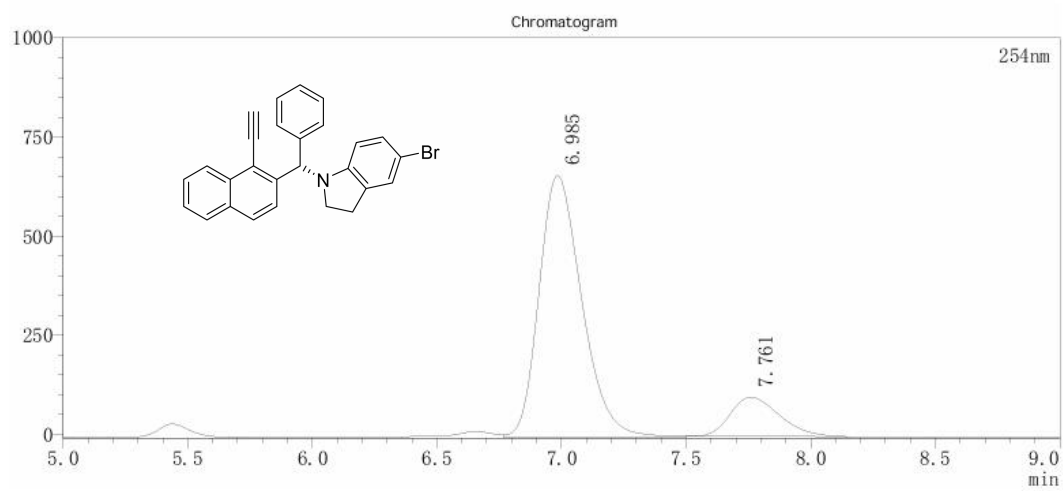

| 254nm |           | Peak Table |        |         |
|-------|-----------|------------|--------|---------|
| Peak# | Ret. Time | Area       | Height | Area%   |
| 1     | 6.985     | 7887021    | 661323 | 85.349  |
| 2     | 7.761     | 1353834    | 98828  | 14.651  |
| Total |           | 9240855    | 760151 | 100.000 |

## racemic-5n

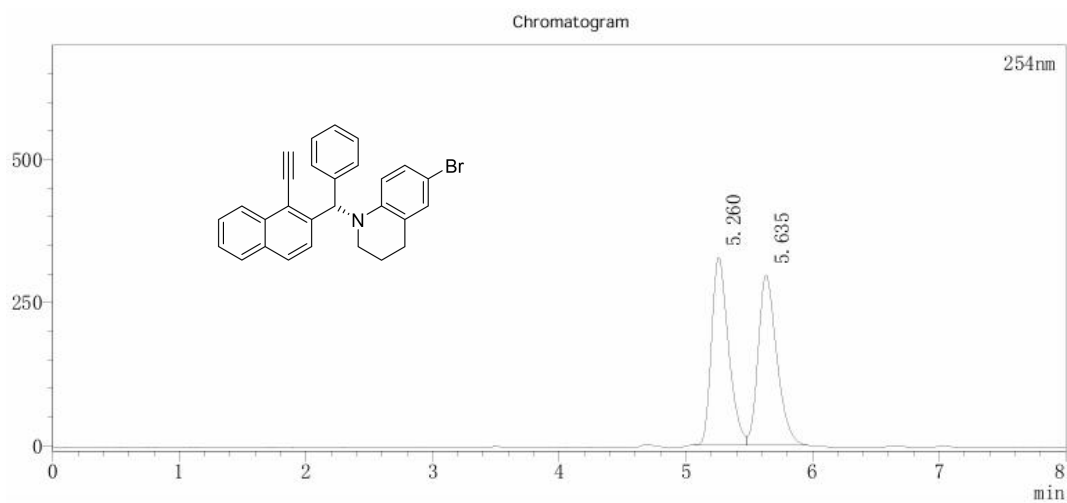

| 254nm        |           | Peak Table     |               |                |  |
|--------------|-----------|----------------|---------------|----------------|--|
| Peak#        | Ret. Time | Area           | Height        | Area%          |  |
| 1            | 5.260     | 3070868        | 328753        | 50.228         |  |
| 2            | 5.635     | 3042939        | 297370        | 49.772         |  |
| <b>Total</b> |           | <b>6113807</b> | <b>626123</b> | <b>100.000</b> |  |

## chiral-5n

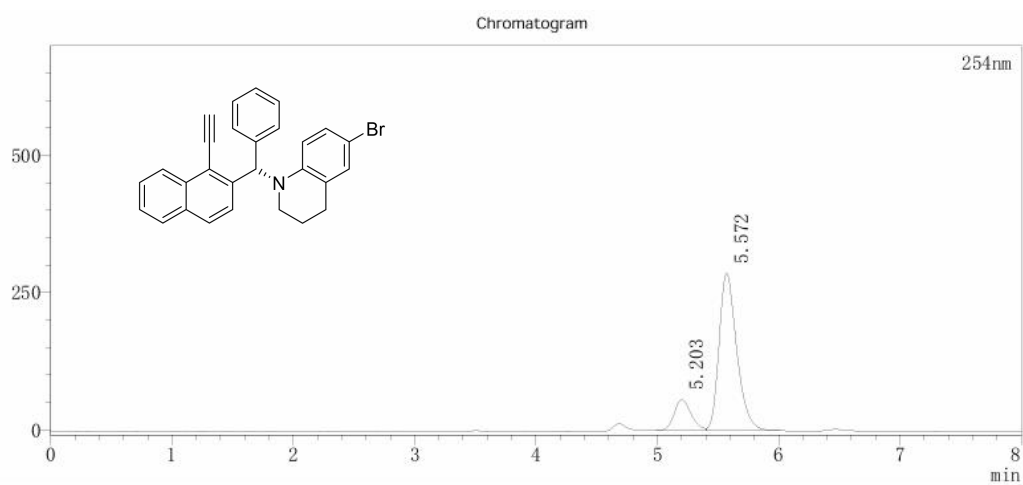

| 254nm        |           | Peak Table     |               |                |  |
|--------------|-----------|----------------|---------------|----------------|--|
| Peak#        | Ret. Time | Area           | Height        | Area%          |  |
| 1            | 5.203     | 535446         | 56133         | 15.581         |  |
| 2            | 5.572     | 2901030        | 286275        | 84.419         |  |
| <b>Total</b> |           | <b>3436476</b> | <b>342408</b> | <b>100.000</b> |  |

## racemic-6a

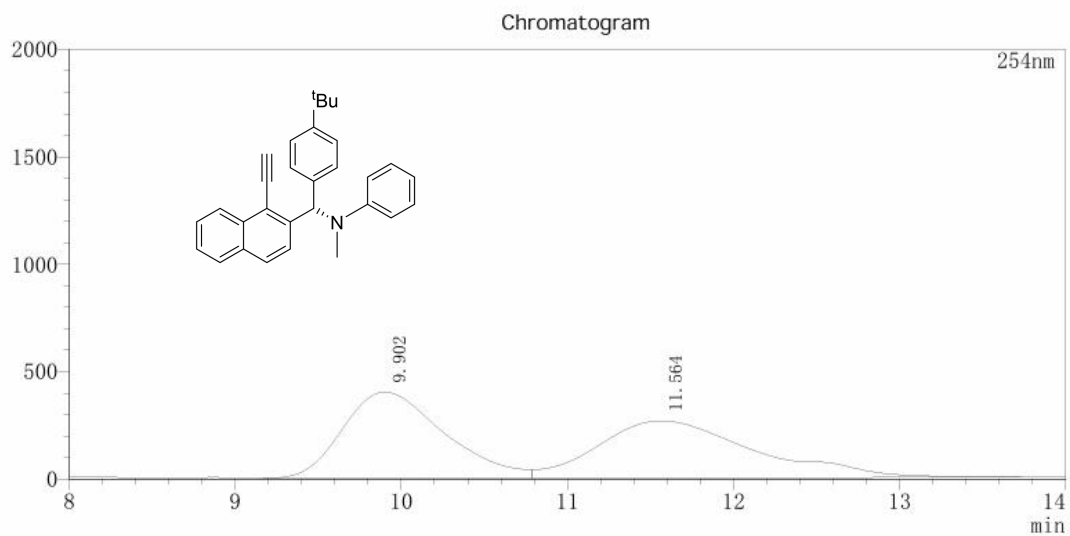

254nm

| Peak# | Ret. Time | Area     | Height | Area%   |
|-------|-----------|----------|--------|---------|
| 1     | 9.902     | 16925760 | 400108 | 49.461  |
| 2     | 11.564    | 17294332 | 264853 | 50.539  |
| Total |           | 34220093 | 664961 | 100.000 |

## chiral-6a

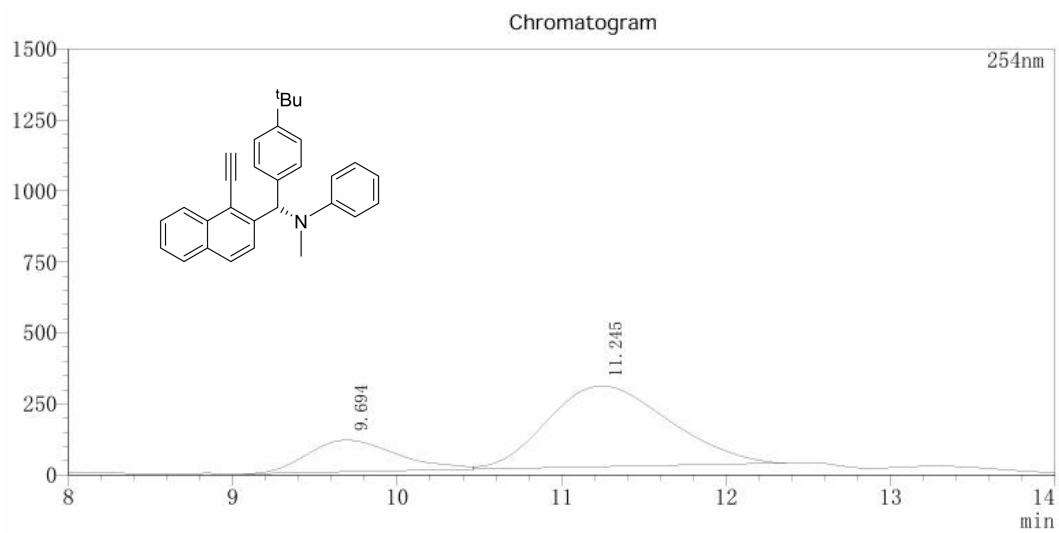

254nm

| Peak# | Ret. Time | Area     | Height | Area%   |
|-------|-----------|----------|--------|---------|
| 1     | 9.694     | 4223817  | 111490 | 22.427  |
| 2     | 11.245    | 14609814 | 283631 | 77.573  |
| Total |           | 18833631 | 395121 | 100.000 |

## racemic-6b

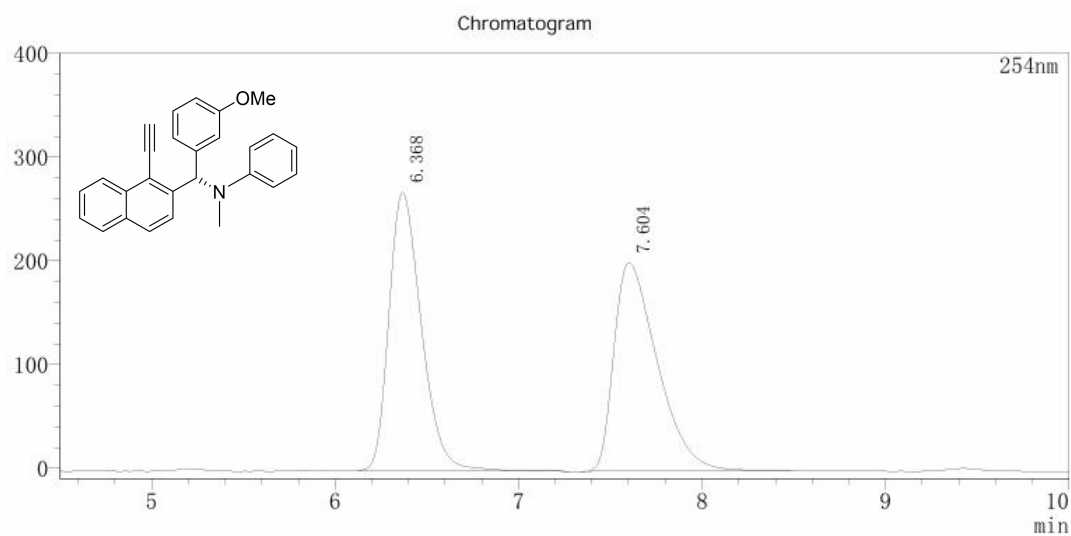

254nm Peak Table

| Peak# | Ret. Time | Area    | Height | Area%   |
|-------|-----------|---------|--------|---------|
| 1     | 6.368     | 3278014 | 268424 | 49.823  |
| 2     | 7.604     | 3301252 | 201051 | 50.177  |
| Total |           | 6579266 | 469475 | 100.000 |

## chiral-6b

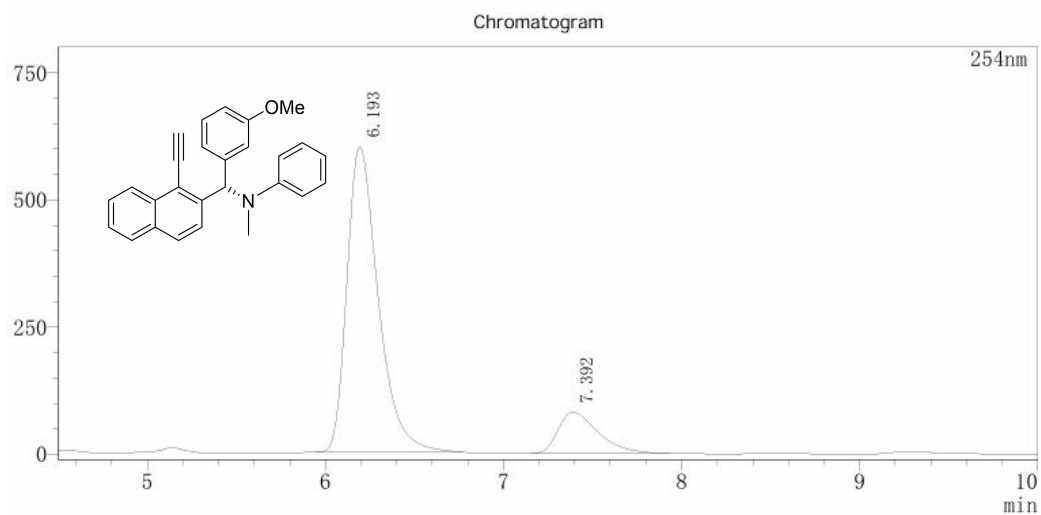

254nm Peak Table

| Peak# | Ret. Time | Area    | Height | Area%   |
|-------|-----------|---------|--------|---------|
| 1     | 6.193     | 7318231 | 600217 | 85.327  |
| 2     | 7.392     | 1258469 | 81064  | 14.673  |
| Total |           | 8576700 | 681281 | 100.000 |

## racemic-6c

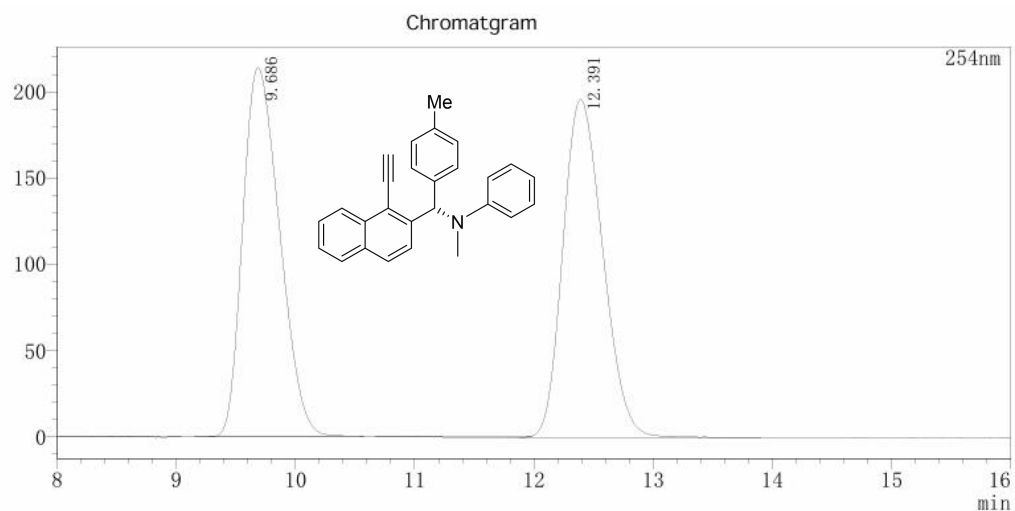

254nm Peak Table

| Peak# | Ret. Time | Area    | Height | Area%   |
|-------|-----------|---------|--------|---------|
| 1     | 9.686     | 4594987 | 213738 | 50.224  |
| 2     | 12.391    | 4554022 | 196010 | 49.776  |
| Total |           | 9149009 | 409748 | 100.000 |

## chiral-6c

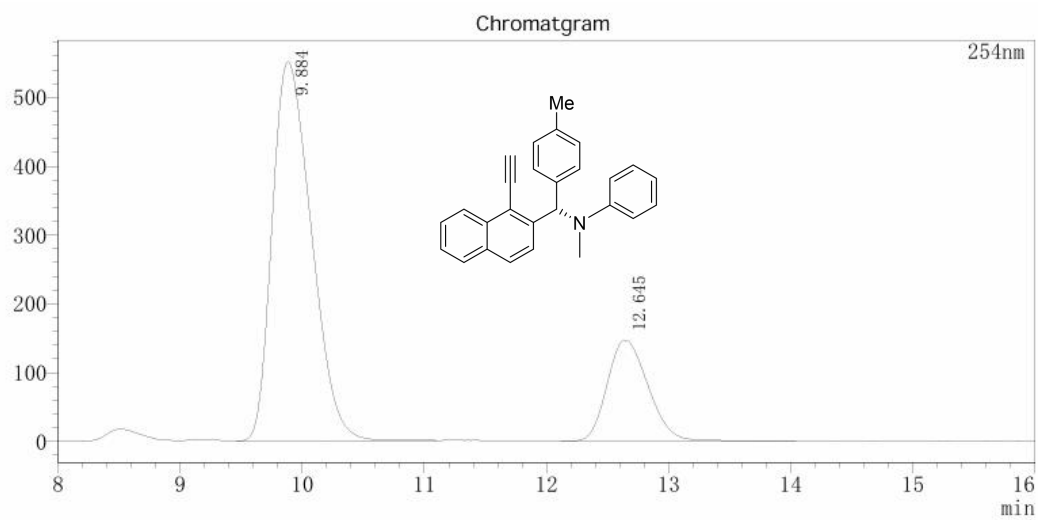

254nm Peak Table

| Peak# | Ret. Time | Area     | Height | Area%   |
|-------|-----------|----------|--------|---------|
| 1     | 9.884     | 12294029 | 551332 | 78.304  |
| 2     | 12.645    | 3406402  | 146794 | 21.696  |
| Total |           | 15700431 | 698126 | 100.000 |

## racemic-6d

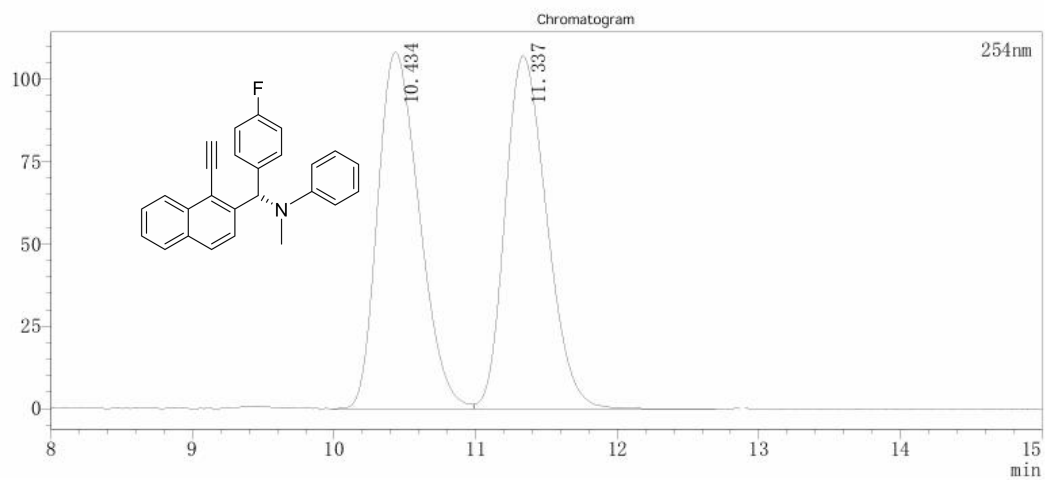

| 254nm        |           | Peak Table     |               |                |
|--------------|-----------|----------------|---------------|----------------|
| Peak#        | Ret. Time | Area           | Height        | Area%          |
| 1            | 10.434    | 2216058        | 108360        | 50.256         |
| 2            | 11.337    | 2193524        | 107176        | 49.744         |
| <b>Total</b> |           | <b>4409582</b> | <b>215536</b> | <b>100.000</b> |

## chiral-6d

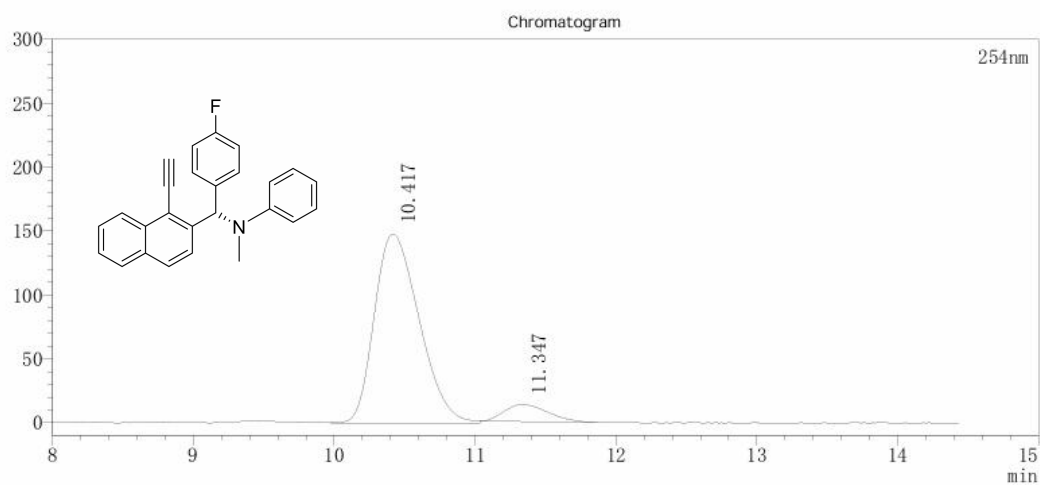

| 254nm        |           | Peak Table     |               |                |
|--------------|-----------|----------------|---------------|----------------|
| Peak#        | Ret. Time | Area           | Height        | Area%          |
| 1            | 10.417    | 3259677        | 147988        | 92.053         |
| 2            | 11.347    | 281425         | 13120         | 7.947          |
| <b>Total</b> |           | <b>3541102</b> | <b>161108</b> | <b>100.000</b> |

## racemic-6e

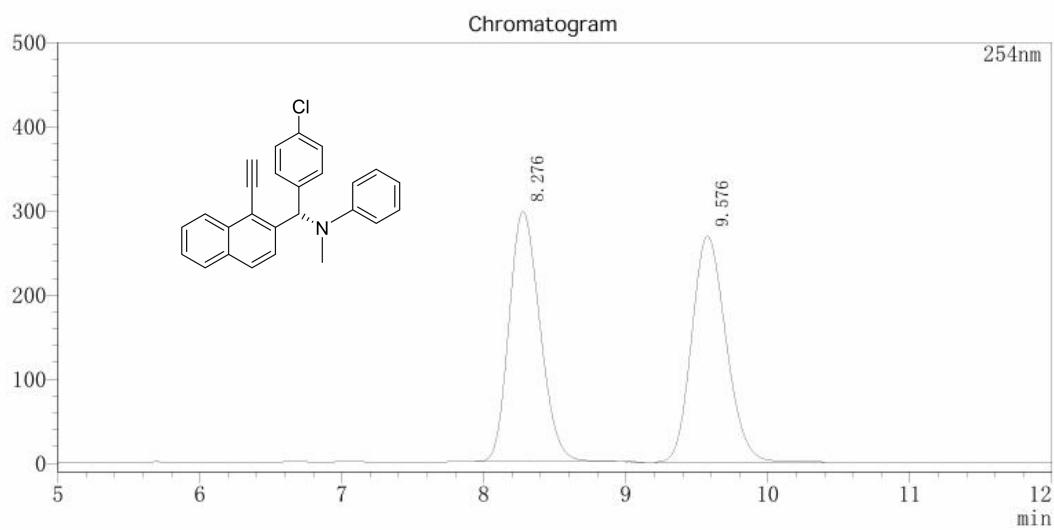

254nm Peak Table

| Peak# | Ret. Time | Area    | Height | Area%   |
|-------|-----------|---------|--------|---------|
| 1     | 8.276     | 4485411 | 297361 | 49.970  |
| 2     | 9.576     | 4490773 | 268196 | 50.030  |
| 总计    |           | 8976184 | 565558 | 100.000 |

## chiral-6e

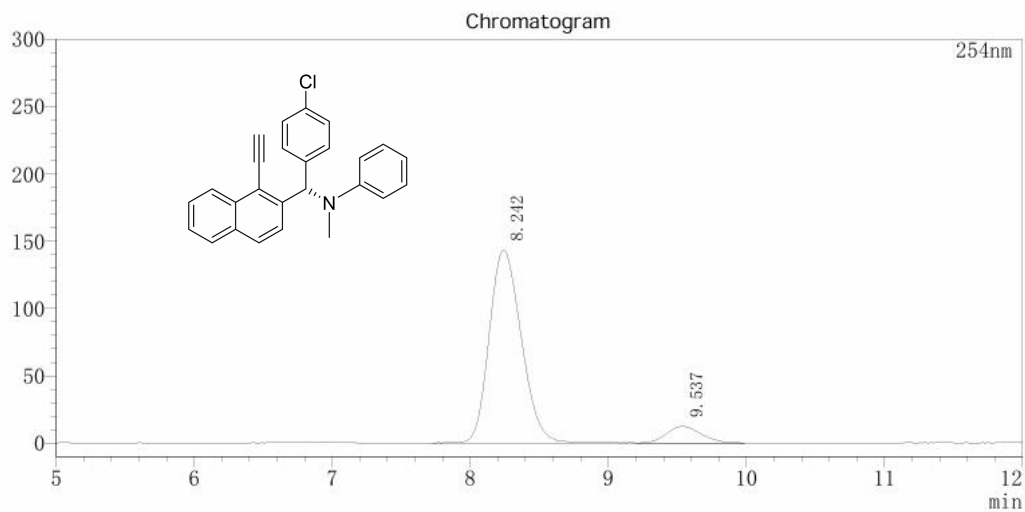

254nm Peak Table

| Peak# | Ret. Time | Area    | Height | Area%   |
|-------|-----------|---------|--------|---------|
| 1     | 8.242     | 2315330 | 143518 | 91.715  |
| 2     | 9.537     | 209157  | 12145  | 8.285   |
| Total |           | 2524487 | 155662 | 100.000 |

## racemic-6f

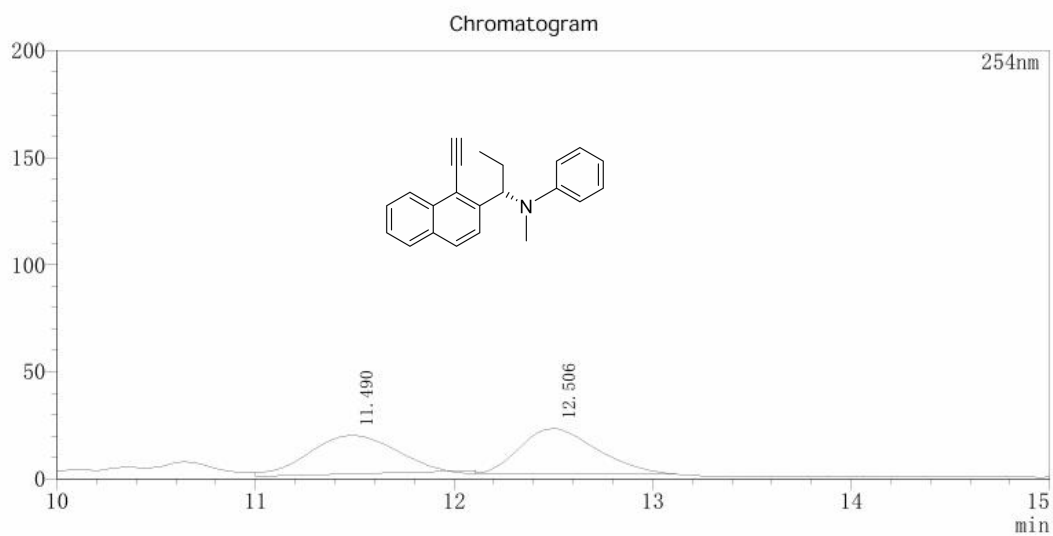

254nm Peak Table

| Peak# | Ret. Time | Area    | Height | Area%   |
|-------|-----------|---------|--------|---------|
| 1     | 11.490    | 539490  | 17927  | 49.056  |
| 2     | 12.506    | 560243  | 20986  | 50.944  |
| Total |           | 1099733 | 38912  | 100.000 |

## chiral-6f

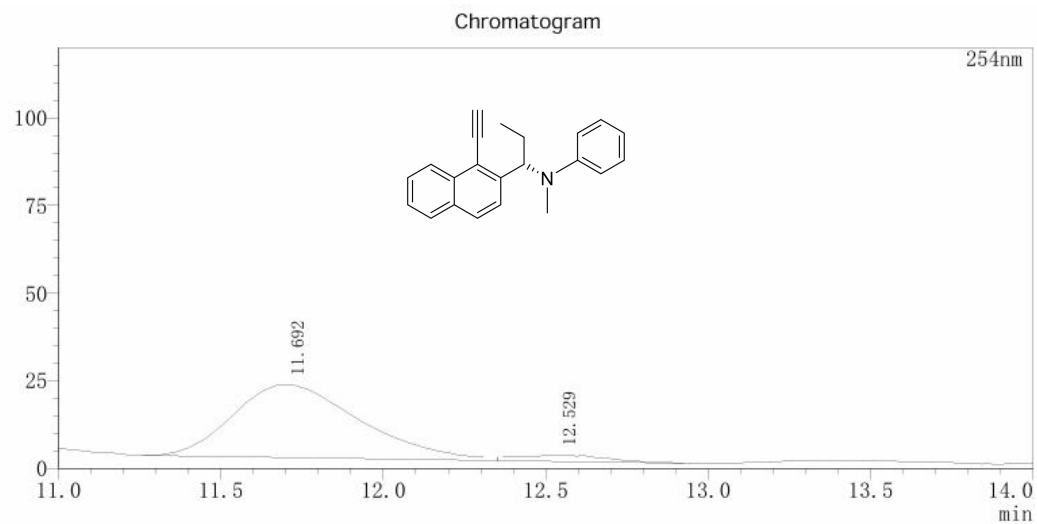

254nm Peak Table

| Peak# | Ret. Time | Area   | Height | Area%   |
|-------|-----------|--------|--------|---------|
| 1     | 11.692    | 562949 | 20836  | 94.251  |
| 2     | 12.529    | 34341  | 1750   | 5.749   |
| Total |           | 597290 | 22586  | 100.000 |

## racemic-6g

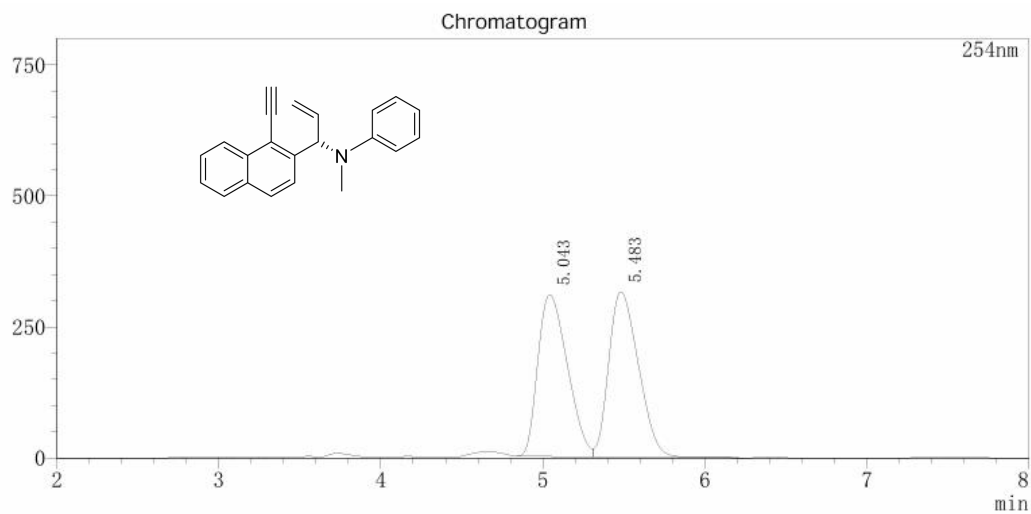

254nm Peak Table

| Peak# | Ret. Time | Area    | Height | Area%   |
|-------|-----------|---------|--------|---------|
| 1     | 5.043     | 3908239 | 308690 | 49.452  |
| 2     | 5.483     | 3994826 | 315117 | 50.548  |
| Total |           | 7903066 | 623807 | 100.000 |

## chiral-6g

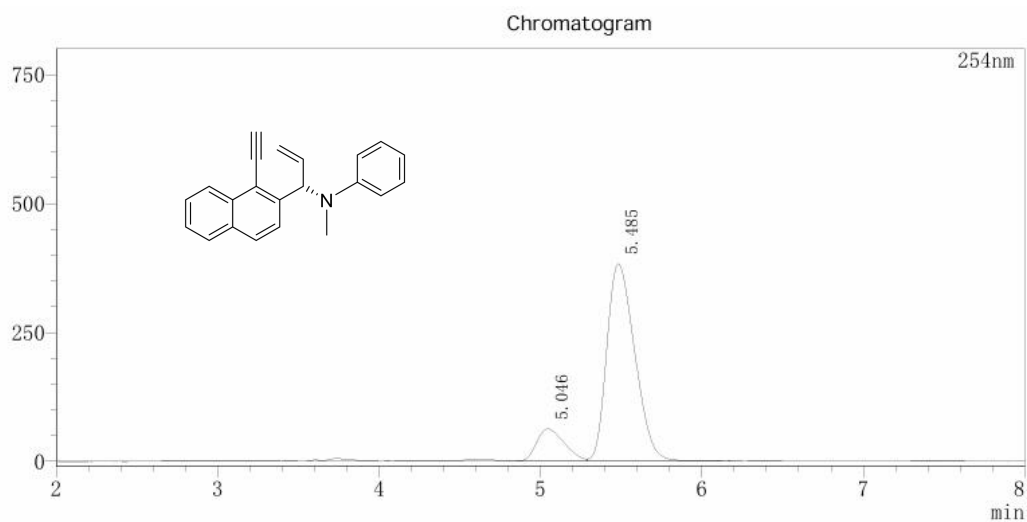

254nm Peak Table

| Peak# | Ret. Time | Area    | Height | Area%   |
|-------|-----------|---------|--------|---------|
| 1     | 5.046     | 732744  | 61946  | 13.751  |
| 2     | 5.485     | 4595745 | 382672 | 86.249  |
| Total |           | 5328488 | 444618 | 100.000 |

## racemic-scale-up

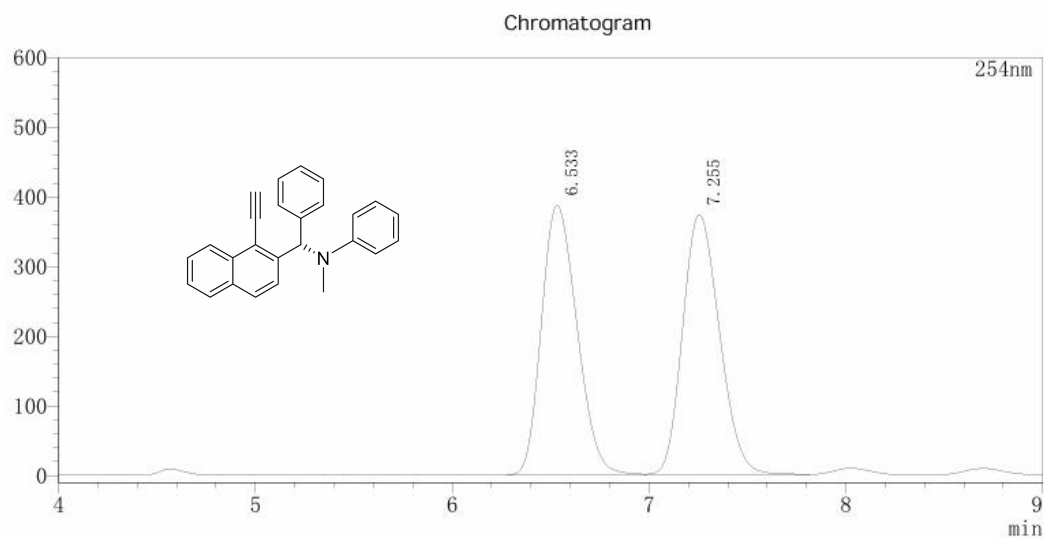

254nm

Peak Table

| Peak# | Ret. Time | Area    | Height | Area%   |
|-------|-----------|---------|--------|---------|
| 1     | 6.533     | 4851710 | 387383 | 49.935  |
| 2     | 7.255     | 4864377 | 373191 | 50.065  |
| Total |           | 9716088 | 760574 | 100.000 |

## chiral-scale-up

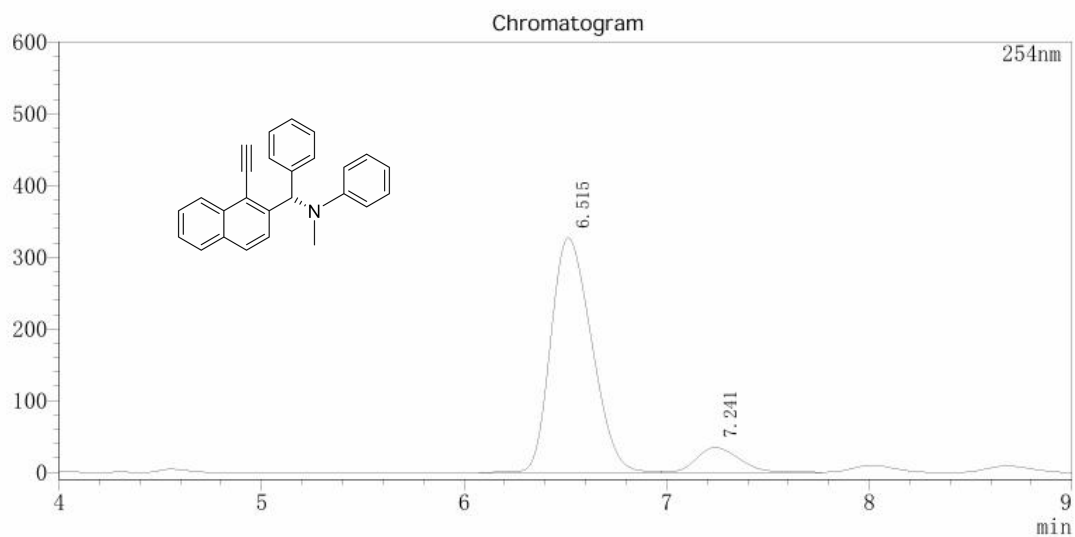

254nm

Peak Table

| Peak# | Ret. Time | Area    | Height | Area%   |
|-------|-----------|---------|--------|---------|
| 1     | 6.515     | 4574586 | 327008 | 90.188  |
| 2     | 7.241     | 497683  | 34460  | 9.812   |
| Total |           | 5072268 | 361469 | 100.000 |

## racemic-9a

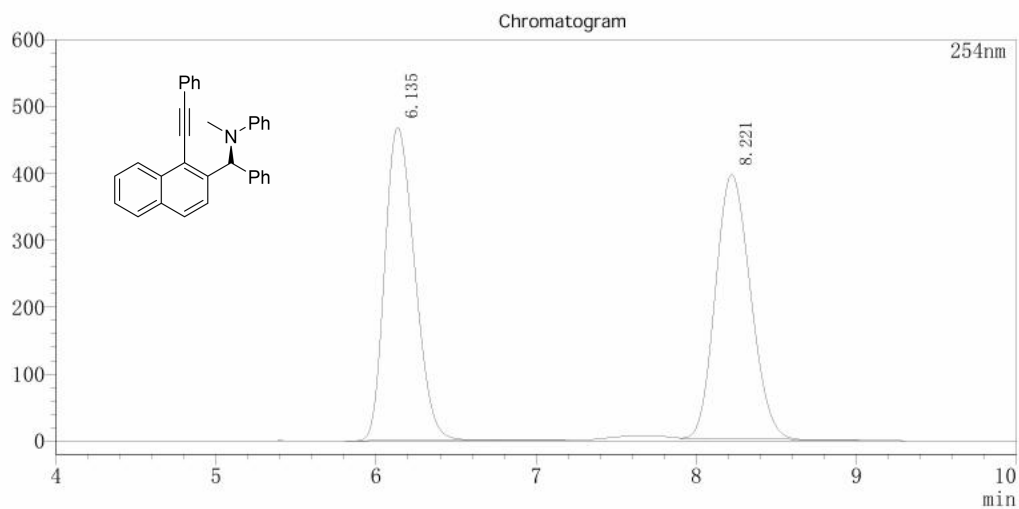

254nm Peak Table

| Peak# | Ret. Time | Area     | Height | Area%   |
|-------|-----------|----------|--------|---------|
| 1     | 6.135     | 6092039  | 468879 | 50.435  |
| 2     | 8.221     | 5986952  | 394714 | 49.565  |
| Total |           | 12078991 | 863594 | 100.000 |

## chiral-9a

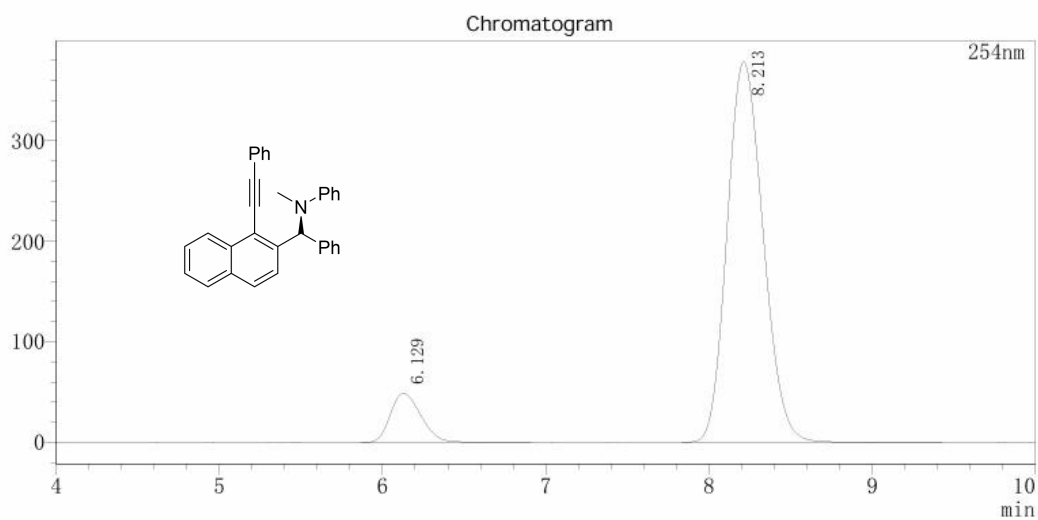

254nm Peak Table

| Peak# | Ret. Time | Area    | Height | Area%   |
|-------|-----------|---------|--------|---------|
| 1     | 6.129     | 634889  | 48748  | 9.842   |
| 2     | 8.213     | 5815686 | 378268 | 90.158  |
| Total |           | 6450575 | 427016 | 100.000 |

## VII. Single Crystal X-Ray Diffraction of 3q, 5a and 7a.

Crystal data and structure refinement for **3q**. The method for crystal growth: mixture of dichloromethane and methanol, at room temperature. X-ray derived ORTEP of **3q** with thermal ellipsoids shown at the 50% probability level.

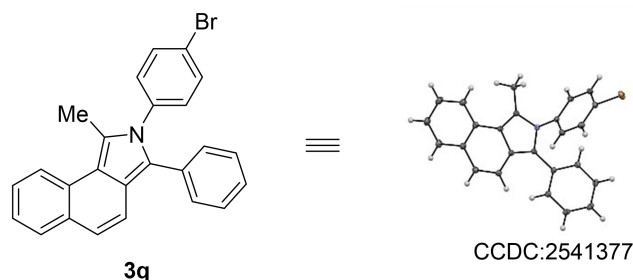

### CCDC :2541377

|                                 |                                        |                 |
|---------------------------------|----------------------------------------|-----------------|
| Identification code             | 3q                                     |                 |
| Empirical formula               | C <sub>25</sub> H <sub>18</sub> BrN    |                 |
| Formula weight                  | 412.31                                 |                 |
| Temperature                     | 173.0 K                                |                 |
| Wavelength                      | 1.54178 Å                              |                 |
| Crystal system                  | Monoclinic                             |                 |
| Space group                     | P 1 21/c 1                             |                 |
| Unit cell dimensions            | a = 11.1703(6) Å                       | a = 90°         |
|                                 | b = 6.4509(3) Å                        | b = 100.878(3)° |
|                                 | c = 26.2834(15) Å                      | g = 90°         |
| Volume                          | 1859.91(17) Å <sup>3</sup>             |                 |
| Z                               | 4                                      |                 |
| Density (calculated)            | 1.472 Mg/m <sup>3</sup>                |                 |
| Absorption coefficient          | 3.061 mm <sup>-1</sup>                 |                 |
| F(000)                          | 840                                    |                 |
| Crystal size                    | 0.24 x 0.22 x 0.19 mm <sup>3</sup>     |                 |
| Theta range for data collection | 3.424 to 71.998°                       |                 |
| Index ranges                    | -13 ≤ h ≤ 13, -7 ≤ k ≤ 7, -32 ≤ l ≤ 22 |                 |
| Reflections collected           | 13857                                  |                 |
| Independent reflections         | 3633 [R(int) = 0.0640]                 |                 |
| Completeness to theta = 67.679° | 99.8 %                                 |                 |
| Absorption correction           | Semi-empirical from equivalents        |                 |

|                                   |                                             |
|-----------------------------------|---------------------------------------------|
| Max. and min. transmission        | 0.7536 and 0.4499                           |
| Refinement method                 | Full-matrix least-squares on F <sup>2</sup> |
| Data / restraints / parameters    | 3633 / 0 / 245                              |
| Goodness-of-fit on F <sup>2</sup> | 1.054                                       |
| Final R indices [I>2sigma(I)]     | R1 = 0.0438, wR2 = 0.1077                   |
| R indices (all data)              | R1 = 0.0583, wR2 = 0.1173                   |
| Extinction coefficient            | n/a                                         |
| Largest diff. peak and hole       | 0.581 and -0.507 e.Å <sup>-3</sup>          |

Crystal data and structure refinement for **5a**. The method for crystal growth: mixture of ethanol, at room temperature. X-ray derived ORTEP of **5a** with thermal ellipsoids shown at the 50% probability level.

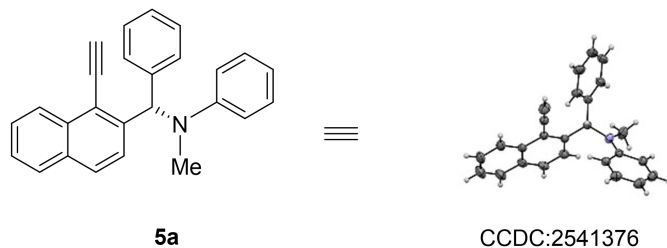

**CCDC :2541376**

|                                 |                                          |                 |
|---------------------------------|------------------------------------------|-----------------|
| Identification code             | 5a                                       |                 |
| Empirical formula               | C <sub>26</sub> H <sub>21</sub> N        |                 |
| Formula weight                  | 347.44                                   |                 |
| Temperature                     | 296.15 K                                 |                 |
| Wavelength                      | 1.54178 Å                                |                 |
| Crystal system                  | Monoclinic                               |                 |
| Space group                     | P 1 21 1                                 |                 |
| Unit cell dimensions            | a = 8.5087(14) Å                         | a = 90°         |
|                                 | b = 9.0486(15) Å                         | b = 105.010(8)° |
|                                 | c = 13.346(2) Å                          | g = 90°         |
| Volume                          | 992.5(3) Å <sup>3</sup>                  |                 |
| Z                               | 2                                        |                 |
| Density (calculated)            | 1.163 Mg/m <sup>3</sup>                  |                 |
| Absorption coefficient          | 0.509 mm <sup>-1</sup>                   |                 |
| F(000)                          | 368                                      |                 |
| Crystal size                    | 0.22 x 0.2 x 0.17 mm <sup>3</sup>        |                 |
| Theta range for data collection | 3.428 to 74.873°                         |                 |
| Index ranges                    | -10 ≤ h ≤ 10, -10 ≤ k ≤ 11, -16 ≤ l ≤ 16 |                 |
| Reflections collected           | 14515                                    |                 |
| Independent reflections         | 3959 [R(int) = 0.0480]                   |                 |
| Completeness to theta = 67.679° | 99.5 %                                   |                 |
| Absorption correction           | Semi-empirical from equivalents          |                 |
| Max. and min. transmission      | 0.7538 and 0.6650                        |                 |

|                                      |                                    |
|--------------------------------------|------------------------------------|
| Refinement method                    | Full-matrix least-squares on $F^2$ |
| Data / restraints / parameters       | 3959 / 1 / 246                     |
| Goodness-of-fit on $F^2$             | 1.041                              |
| Final R indices [ $I > 2\sigma(I)$ ] | R1 = 0.0423, wR2 = 0.0969          |
| R indices (all data)                 | R1 = 0.0589, wR2 = 0.1102          |
| Absolute structure parameter         | 0.4(5)                             |
| Extinction coefficient               | 0.032(3)                           |
| Largest diff. peak and hole          | 0.096 and -0.109 e.Å <sup>-3</sup> |

Crystal data and structure refinement for **7a**. The method for crystal growth: mixture of dichloromethane and methanol, at room temperature. X-ray derived ORTEP of **7a** with thermal ellipsoids shown at the 50% probability level.

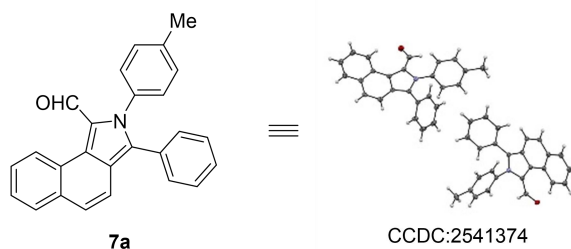

### CCDC :2541374

|                                 |                                         |                |
|---------------------------------|-----------------------------------------|----------------|
| Identification code             | 7a                                      |                |
| Empirical formula               | C <sub>26</sub> H <sub>19</sub> NO      |                |
| Formula weight                  | 361.42                                  |                |
| Temperature                     | 173.0 K                                 |                |
| Wavelength                      | 1.54178 Å                               |                |
| Crystal system                  | Triclinic                               |                |
| Space group                     | P-1                                     |                |
| Unit cell dimensions            | a = 9.2110(9) Å                         | a = 87.203(4)° |
|                                 | b = 9.3934(9) Å                         | b = 80.528(4)° |
|                                 | c = 22.180(2) Å                         | g = 84.782(4)° |
| Volume                          | 1884.0(3) Å <sup>3</sup>                |                |
| Z                               | 4                                       |                |
| Density (calculated)            | 1.274 Mg/m <sup>3</sup>                 |                |
| Absorption coefficient          | 0.600 mm <sup>-1</sup>                  |                |
| F(000)                          | 760                                     |                |
| Crystal size                    | 0.14 x 0.12 x 0.08 mm <sup>3</sup>      |                |
| Theta range for data collection | 2.021 to 68.320°                        |                |
| Index ranges                    | -11 ≤ h ≤ 11, -11 ≤ k ≤ 9, -24 ≤ l ≤ 26 |                |
| Reflections collected           | 18311                                   |                |
| Independent reflections         | 6773 [R(int) = 0.0486]                  |                |
| Completeness to theta = 67.679° | 98.4 %                                  |                |
| Absorption correction           | Semi-empirical from equivalents         |                |
| Max. and min. transmission      | 0.7531 and 0.6540                       |                |

|                                      |                                    |
|--------------------------------------|------------------------------------|
| Refinement method                    | Full-matrix least-squares on $F^2$ |
| Data / restraints / parameters       | 6773 / 0 / 506                     |
| Goodness-of-fit on $F^2$             | 1.056                              |
| Final R indices [ $I > 2\sigma(I)$ ] | R1 = 0.0496, wR2 = 0.1221          |
| R indices (all data)                 | R1 = 0.0652, wR2 = 0.1343          |
| Extinction coefficient               | n/a                                |
| Largest diff. peak and hole          | 0.267 and -0.241 e.Å <sup>-3</sup> |
